# Supplementary material
Source: PubMed Central journal article supplement (PMC9336542)
Supplement: NIHMS1824212-supplement-Final_SI_File.pdf [file NIHMS1824212-supplement-Final_SI_File.pdf]

## The Evolution of a Short and Stereocontrolled Synthesis of (+)-7,20-Diisocyanoadociane

Philipp C. Roosen<sup>a</sup>, Alexander S. Karns<sup>a</sup>, Bryan D. Ellis<sup>a</sup>, and Christopher D. Vanderwal<sup>\*a,b</sup>

<sup>a</sup>Department of Chemistry, 1102 Natural Science II, University of California, Irvine, CA 92697-2025, USA

<sup>b</sup>Department of Pharmaceutical Sciences, 101 Theory, Suite 101, University of California, Irvine, CA 92697-3958, USA

### Supporting Information

#### A. Table of Contents

|                                                           |    |
|-----------------------------------------------------------|----|
| A. Table of Contents.....                                 | S1 |
| B. General Experimental Details.....                      | S2 |
| C. Experimental Procedures and Characterization Data..... | S2 |
| 1. Preparation of S2.....                                 | S2 |
| 2. Preparation of S3.....                                 | S3 |
| 3. Preparation of S4.....                                 | S3 |
| D. NMR Spectra.....                                       | S4 |

## B. General Experimental Details

All reactions were carried out under an argon atmosphere with dry solvents under anhydrous conditions, unless otherwise noted. Argon balloons were the sole inert atmosphere used. Reactions run at an ambient temperature of 20–25 °C are designated as room temperature. Reactions that were performed open to air utilized solvent dispensed from a wash bottle or solvent bottle, and no precautions were taken to exclude water. Reactions that were performed open to air utilized solvent dispensed from a wash bottle or solvent bottle, and no precautions were taken to exclude water. Yields refer to chromatographically and spectroscopically homogeneous materials, unless otherwise stated. Dry tetrahydrofuran (THF) and dichloromethane (CH<sub>2</sub>Cl<sub>2</sub>) were obtained by passing commercially available formulations through activated alumina columns. Triethylamine (NEt<sub>3</sub>) was purified by distillation from CaH<sub>2</sub>. (±)-Propylene oxide was purified by distillation. Grignard reagents were titrated using salicylaldehyde phenylhydrazone in THF.

Thin layer chromatography was performed on 0.25 mm EMD glass-backed TLC plates impregnated with a fluorescent dye and visualized with UV light and KMnO<sub>4</sub> in K<sub>2</sub>CO<sub>3</sub>/NaOH/water. Forced flow (flash) chromatography was performed on EMD Silica 60, mesh 0.04-0.063 silica gel. NMR spectra were recorded on Bruker 500 MHz or 600 MHz instrument, obtained at 298 K unless otherwise noted and calibrated to residual undeuterated solvent as an internal reference. Chemical shifts are reported in ppm with the following abbreviations to explain multiplicities: s = singlet, d = doublet, t = triplet, q = quartet, quin = quintuplet, sext = sextet, sep = septet, bs = broad signal, m = multiplet. All coupling constants are apparent *J* values measured at the indicated field strengths and reported in Hertz (Hz). FT-IR spectra were recorded on a Perkin-Elmer spectrum RX1 or Varian 640-IR spectrometer. High-resolution mass spectra (HRMS) were recorded on a Waters LCT Premier spectrometer using ESI-TOF (electrospray ionization-time of flight) or Waters GCT Premier spectrometer using GC-MS, as indicated. Melting points were measured on a MEL-TEMP II capillary apparatus and stand uncorrected.

## C. Experimental Procedures and Characterization Data

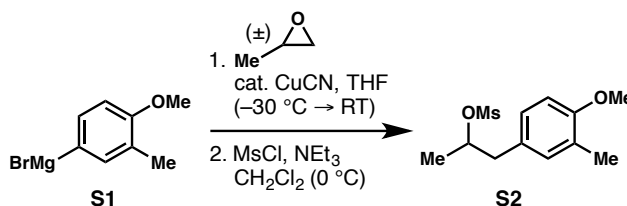

**Mesylate S2:** A 100 mL round bottom flask containing 720 mg (29.6 mmol) magnesium metal was flame-dried, layered with 5 mL THF, treated with a couple drops of dibromoethane and heated to 70 °C. A solution of 5.00 g (24.9 mmol) 4-bromo-2-methylanisole in 25 mL THF was added dropwise as to maintain a gentle reflux. After complete addition the reaction was stirred at 70 °C another hour then cooled to –30 °C. After the addition of 70 mg (0.80 mmol) CuCN and 2.0 mL (28.6 mmol) (rac)-propylene oxide the reaction was stirred for 1 hour with gradual warming to 0 °C, then stirred an additional half hour at room temperature. The reaction was quenched with 100 mL half sat. NH<sub>4</sub>Cl and extracted with 100 mL EtOAc. The aqueous layer was separated and back extracted with 20 mL EtOAc. Both organic layers were combined, washed with 50 mL sat. NH<sub>4</sub>Cl, 30 mL third sat. NH<sub>4</sub>Cl, 20 mL brine, dried over MgSO<sub>4</sub>, filtered and all volatiles removed in vacuo. The residue was used for the next without purification. To a 250 mL round bottom flask containing crude alcohol, was added 80 mL CH<sub>2</sub>Cl<sub>2</sub> and 15 mL (108 mmol) NEt<sub>3</sub>. After the dropwise addition of 3.0 mL (38.8 mmol) methanesulfonyl chloride at 0 °C, the reaction was stirred at 0 °C for 2 hours. To the stirring mixture was added 150 mL sat. NaHCO<sub>3</sub> and vigorous stirring continued without external cooling for 20 minutes. Layers were separated and the aqueous layer washed with 20 mL CH<sub>2</sub>Cl<sub>2</sub>. The organic layers were combined, washed with 40 mL brine, dried over MgSO<sub>4</sub>, filtered and all volatiles removed in vacuo. The residue was purified by column chromatography (5:1 hexanes/EtOAc) then recrystallized from Et<sub>2</sub>O/pentane to afford 5.24 g (81% over 2 steps) **S2** as white crystals (mp = 60–62 °C). <sup>1</sup>H NMR (500 MHz, CDCl<sub>3</sub> at 7.27 ppm) δ 7.03-6.98 (m, 2H), 6.77 (d, *J* = 8.1 Hz, 1H), 4.85 (ttd, *J* = 6.6, 6.4, 6.2 Hz, 1H), 3.82 (s, 3H), 2.91 (dd, *J* = 14.1, 8.0 Hz, 1H), 2.81 (dd, *J* = 14.0, 5.4 Hz, 1H), 2.54-2.52 (m, 3H), 2.18-2.16 (m, 3H), 1.46 (d, *J* = 6.2 Hz, 3H);

$^{13}\text{C}\{^1\text{H}\}$  NMR (126 MHz,  $\text{CDCl}_3$  at 77 ppm)  $\delta$  156.8, 131.8, 128.3, 127.7, 126.8, 109.9, 81.8, 55.3, 42.1, 37.8, 21.4, 16.2; IR (thin film) 2935, 2836, 1612, 1505, 1346, 1253, 1172  $\text{cm}^{-1}$ ; HRMS (ESI) calculated for  $\text{C}_{12}\text{H}_{18}\text{O}_4\text{S}$   $[\text{M}+\text{Na}]^+$  281.0833 found 281.0823.

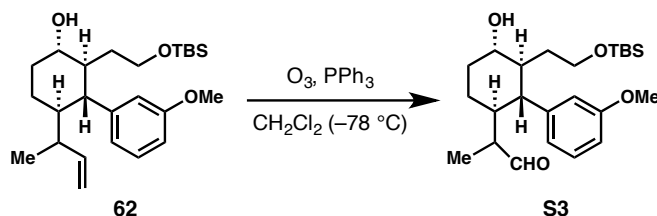

**Alcohol S3:** To a 1 dram vial containing 12 mg (0.029 mmol) **62** in 0.5 mL  $\text{CH}_2\text{Cl}_2$  was bubbled  $\text{O}_3/\text{O}_2$  at  $-78^\circ\text{C}$  until the solution turned blue. The flask was purged with  $\text{O}_2$  until the blue color faded, then 9 mg (0.034 mmol)  $\text{PPh}_3$  in 0.2 mL  $\text{CH}_2\text{Cl}_2$  was added. Stirring was continued at  $-78^\circ\text{C}$  for 1 hour then the bath was removed. After 2 hours the contents were diluted with EtOAc, dried over  $\text{MgSO}_4$ , filtered and all volatiles removed in vacuo. The crude oil was purified by column chromatography (5:1 hexanes/EtOAc) to afford 8 mg (67%) **S3** as a colorless oil.  $^1\text{H}$  NMR (500 MHz,  $\text{CDCl}_3$  at 7.27 ppm)  $\delta$  9.47 (s, 0.5H), 9.40 (s, 0.5H), 7.21 (bs, 1H), 6.88-6.57 (m, 3H), 4.80 (bs, 1H), 3.81 (s, 1.5H), 3.80 (s, 1.5H), 3.61-3.58 (m, 1H), 3.39 (qd,  $J = 10.1, 3.7$  Hz, 1H), 3.31-3.24 (m, 1H), 2.25-2.13 (m, 2H), 1.97-1.86 (m, 2H), 1.74-1.22 (m, 5H), 1.00 (d,  $J = 7.1$  Hz, 1.5H), 1.01-0.89 (m, 1H), 0.95 (d,  $J = 7.1$  Hz, 1.5H), 0.89 (s, 4.5H), 0.89 (s, 4.5H), 0.05 (s, 6H);  $^{13}\text{C}\{^1\text{H}\}$  NMR (126 MHz,  $\text{CDCl}_3$  at 77 ppm)  $\delta$  205.1, 203.9, 144.2, 144.1, 73.8, 73.8, 63.0, 55.2, 48.2, 47.8, 46.5, 35.1, 34.8, 34.4, 34.0, 26.8, 25.9, 24.6, 18.2, 10.9, 6.8,  $-5.5, -5.6$ ; IR (thin film) 3410, 2929, 2857, 1721, 1599, 1464, 1256, 1081, 1047, 836, 778  $\text{cm}^{-1}$ ; HRMS (ESI) calculated for  $\text{C}_{24}\text{H}_{40}\text{O}_4\text{Si}$   $[\text{M}+\text{Na}]^+$  443.2594 found 443.2595.

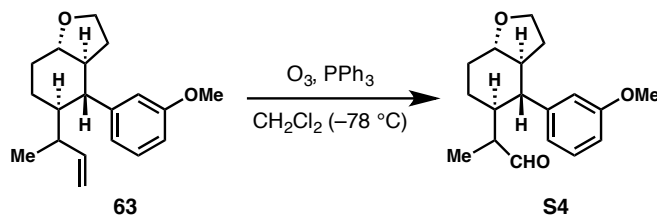

To a 1 dram vial containing 73 mg (0.255 mmol) **63** in 2.5 mL  $\text{CH}_2\text{Cl}_2$  was bubbled  $\text{O}_3/\text{O}_2$  at  $-78^\circ\text{C}$  until the solution turned blue. The flask was purged with  $\text{O}_2$  until the blue color faded, then 80 mg (0.305 mmol)  $\text{PPh}_3$  was added. Stirring was continued at  $-78^\circ\text{C}$  for 2 hours then the bath was removed. After 6 hours the reaction was dried over  $\text{MgSO}_4$ , filtered and all volatiles removed in vacuo. The crude oil was purified by column chromatography (3:1  $\rightarrow$  1:2 hexanes/EtOAc) to afford 65 mg (89%, with  $\sim 25\%$  over oxidation) **S4** as a colorless oil.  $^1\text{H}$  NMR (500 MHz,  $\text{CDCl}_3$  at 7.27 ppm) major  $\delta$  9.55 (s, 0.5H), 9.49 (s, 0.5H), 7.29-7.23 (m, 1H), 6.81-6.74 (m, 3H), 4.09 (s, 1H), 3.94-3.85 (m, 2H), 3.83 (s, 1.5H), 3.82 (s, 1.5H), 3.21 (dtd,  $J = 17.8, 10.5, 3.5$  Hz, 1H), 2.56 (t,  $J = 10.9$  Hz, 1H), 2.39-2.16 (m, 3H), 2.10-1.99 (m, 1H), 1.83-1.35 (m, 4H), 1.07 (d,  $J = 7.1$  Hz, 1.5H), 1.00 (d,  $J = 7.1$  Hz, 1.5H);  $^{13}\text{C}\{^1\text{H}\}$  NMR (126 MHz,  $\text{CDCl}_3$  at 77 ppm)  $\delta$  205.1, 204.1, 143.62, 143.59, 129.9, 129.84, 129.80, 111.8, 67.3, 67.2, 55.3, 55.2, 51.9, 51.7, 47.6, 47.0, 46.4, 42.2, 30.8, 30.4, 30.1, 29.9, 27.0, 24.8, 14.3, 11.3, 7.1; IR (thin film) 2936, 2879, 1720, 1600, 1485, 1262, 1158, 1045  $\text{cm}^{-1}$ ; HRMS (ESI) calculated for  $\text{C}_{18}\text{H}_{24}\text{O}_3$   $[\text{M}+\text{Na}]^+$  311.1623 found 311.1635.

#### D. Copies of NMR Spectra

1H spectrum

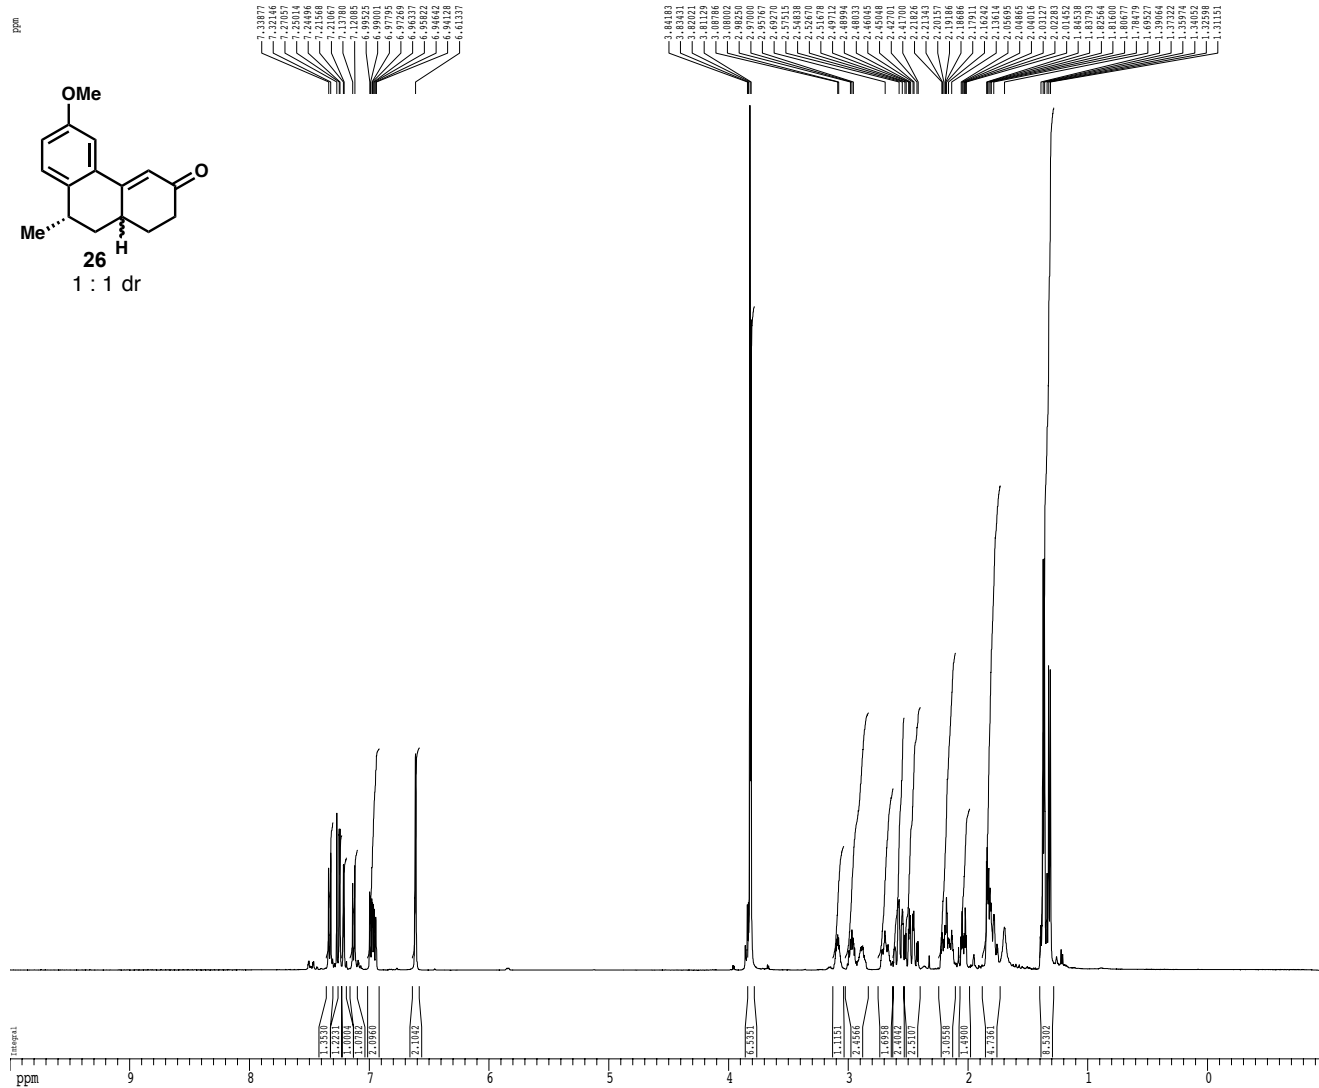

Z-restored spin-echo 13C spectrum with 1H decoupling

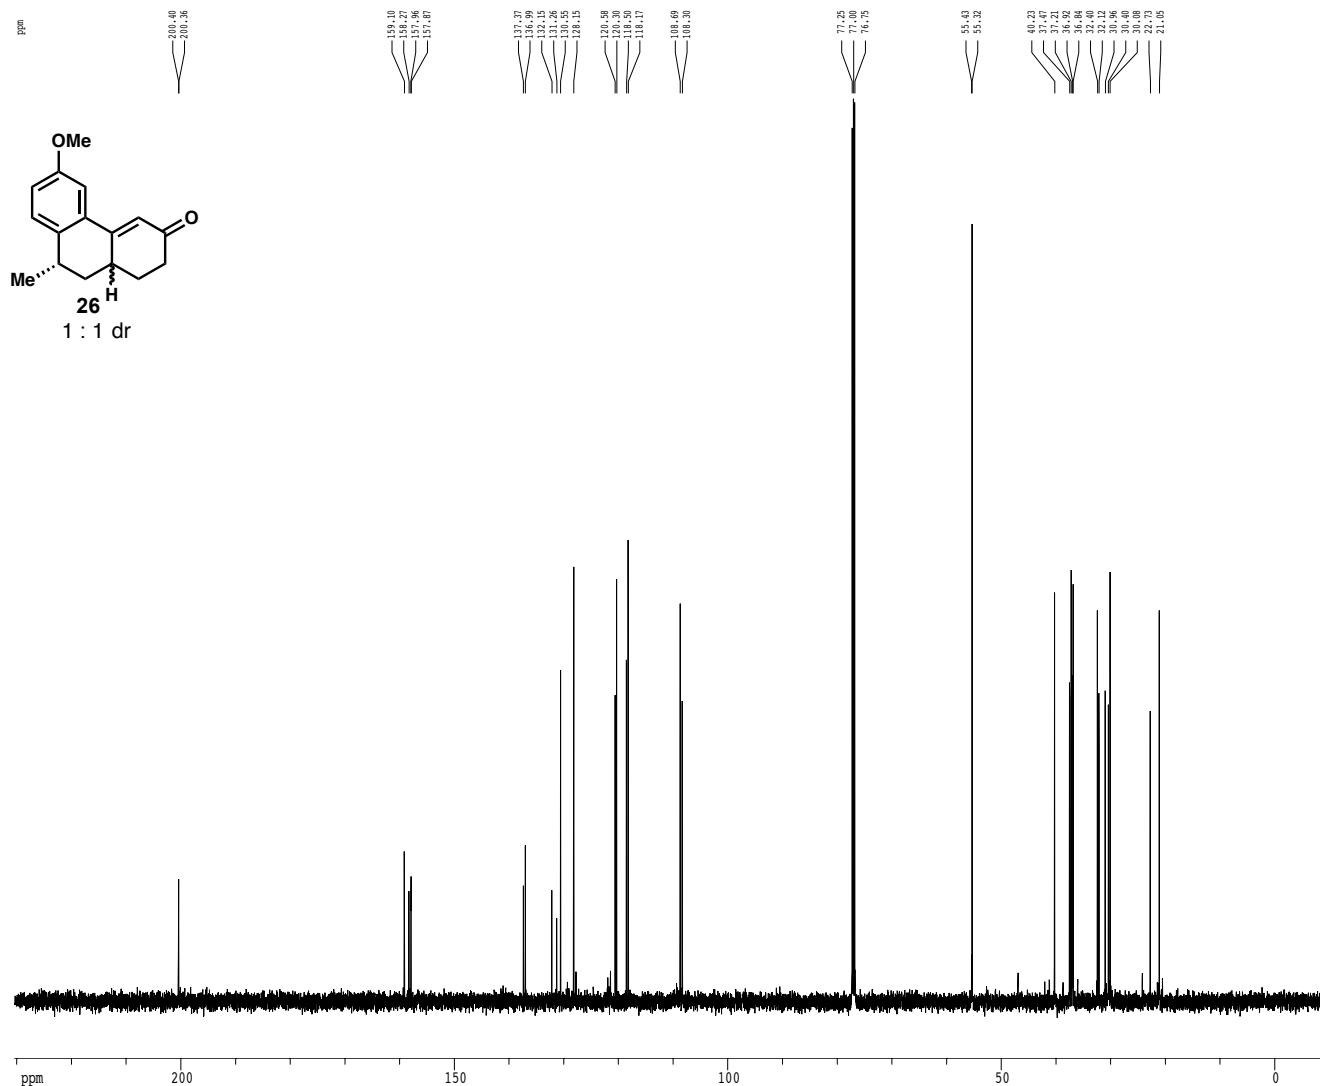

```

Current Data Parameters
USER          roosen
NAME          pcr3.113_16date
EXPNO         4
PROCNO        1

F2 - Acquisition Parameters
Date_         20140714
Time_         12.05
INSTRUM       cryo500
PROBHD        5 mm CPXI 1h-
PULPROG       SpinEcho30ppm.prd
TD            65536
SOLVENT       CDCl3
NS            296
DS            2
SWH           30303.031 Hz
FIDRES        0.462388 Hz
AQ            1.0813940 sec
RG            5792.6
EM            16.500 usec
DE            6.00 usec
TE            298.0 K
D1            0.5000000 sec
d11           0.0300000 sec
D16           0.0020000 sec
d17           0.0019600 sec
MCREST        0.0000000 sec
MCWRR         0.0150000 sec
F2            31.00 usec

===== CHANNEL f1 =====
NUC1           13C
P1            15.50 usec
P11           500.00 usec
P12           2000.00 usec
PL0           120.00 db
PL1           -1.00 db
SFO1          125.7942540 MHz
SF1           3.20 db
SF2           3.20 db
SFRAM1        Crp60, 0.5, 20.1
SFRAM2        Crp60comp, 4
SPOFF1        0.00 Hz
SPOFF2        0.00 Hz

===== CHANNEL f2 =====
CPDPRG2       waltz16
NUC2           1H
PCPD2         100.00 usec
PL2           1.60 db
PL12          24.40 db
SFO2          500.225011 MHz

===== GRADIENT CHANNEL =====
GPRAM1        SINE.100
GPRAM2        SINE.100
GPX1           0.00 %
GPX2           0.00 %
GPT1           0.00 %
GPT2           0.00 %
GPH1           30.00 %
GPH2           50.00 %
p15           500.00 usec
p16           1000.00 usec

F2 - Processing parameters
SI            65536
SF            125.7804309 MHz
WDW           EM
SSB           0
LA            1.00 Hz
GB            0
PC            2.00

1D NMR plot parameters
CX            22.80 cm
CY            15.65 cm
F1P           230.365 ppm
F1            28975.44 Hz
F2P           -10.555 ppm
F2            -1327.59 Hz
PPHMC         10.38667 ppm/cm
SFCX         1329.08932 Hz/cm
    
```

1H spectrum

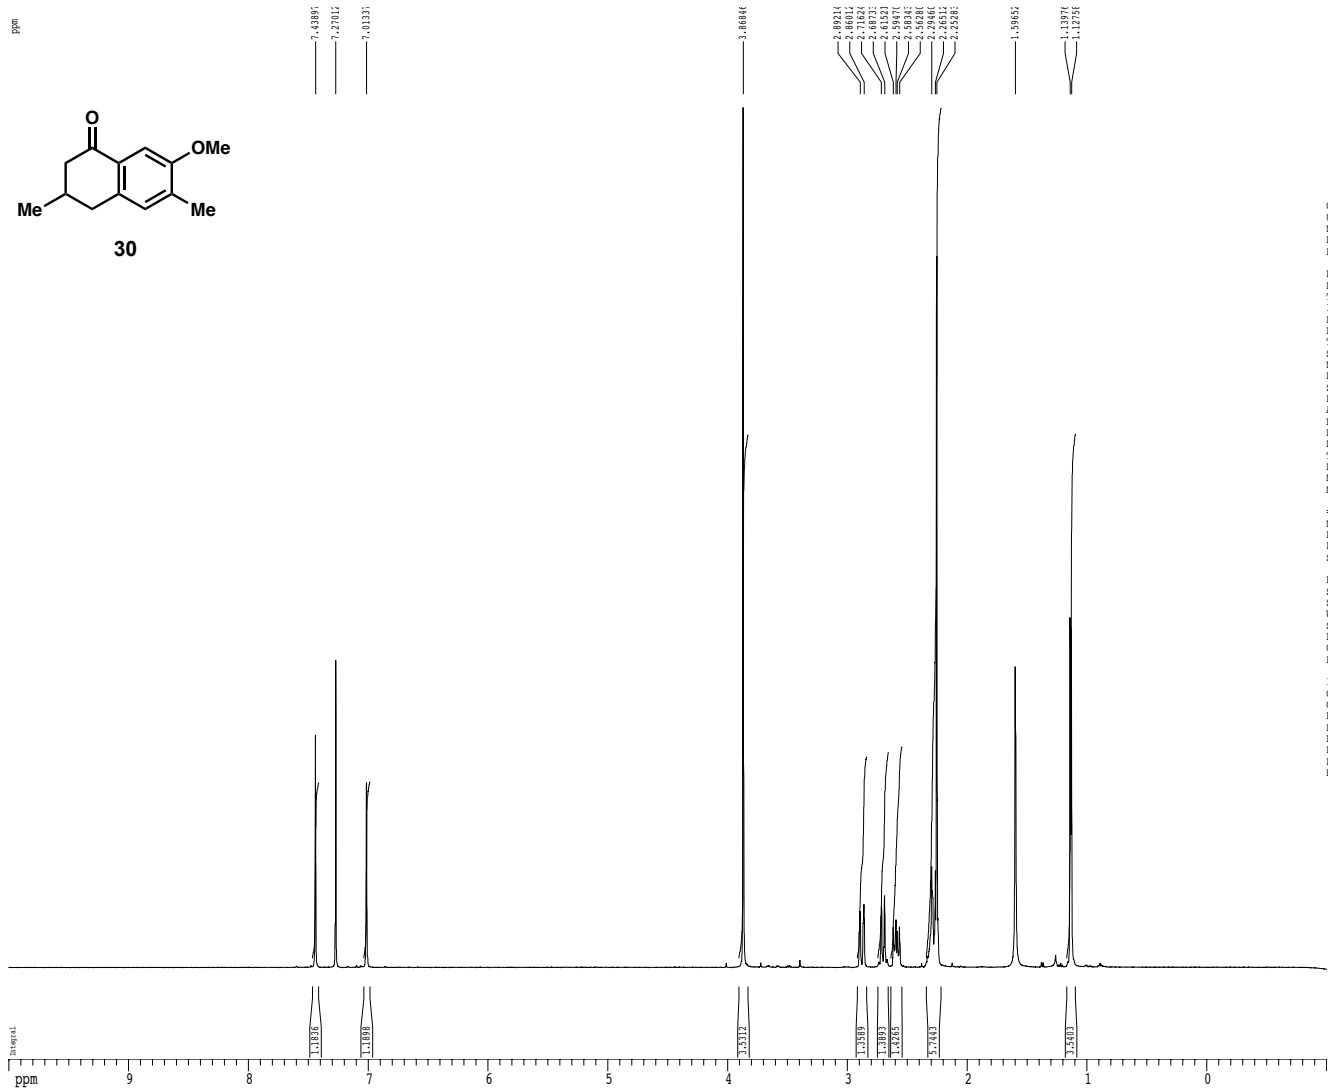

Current Data Parameters  
 USER roosen  
 NAME pcr3.159\_isolate  
 EXPNO 1  
 PROCNO 1

F2 - Acquisition Parameters  
 Date\_ 20140728  
 Time 9.45  
 INSTRUM cryo500  
 PROBRD 5 mm CPYCI 1H-  
 PULPROG zg30  
 TD 32048  
 SOLVENT CDCl3  
 NS 16  
 DS 2  
 SWH 8012.820 Hz  
 FIDRES 0.250026 Hz  
 AQ 1.9998451 sec  
 RG 5  
 DW 62.400 usec  
 DE 6.00 usec  
 TE 298.0 K  
 DI 0.10000000 sec  
 MCHST 0.00000000 sec  
 MCHRX 0.01500000 sec

----- CHANNEL f1 -----  
 NUC1 1H  
 P1 7.50 usec  
 PL1 1.60 dB  
 SFO1 500.2233015 MHz

F2 - Processing parameters  
 SI 65536  
 SF 500.2200265 MHz  
 WDW EM  
 SSB 0  
 LB 0.30 Hz  
 GB 0  
 PC 4.00

1D NMR plot parameters  
 CX 22.80 cm  
 CT 15.00 cm  
 FIP 10.000 ppm  
 FI 5002.20 Hz  
 FFP -1.000 ppm  
 FQ -500.22 Hz  
 PPMH 0.48246 ppm/cm  
 HZCM 241.33423 Hz/cm

Z-restored spin-echo 13C spectrum with 1H decoupling

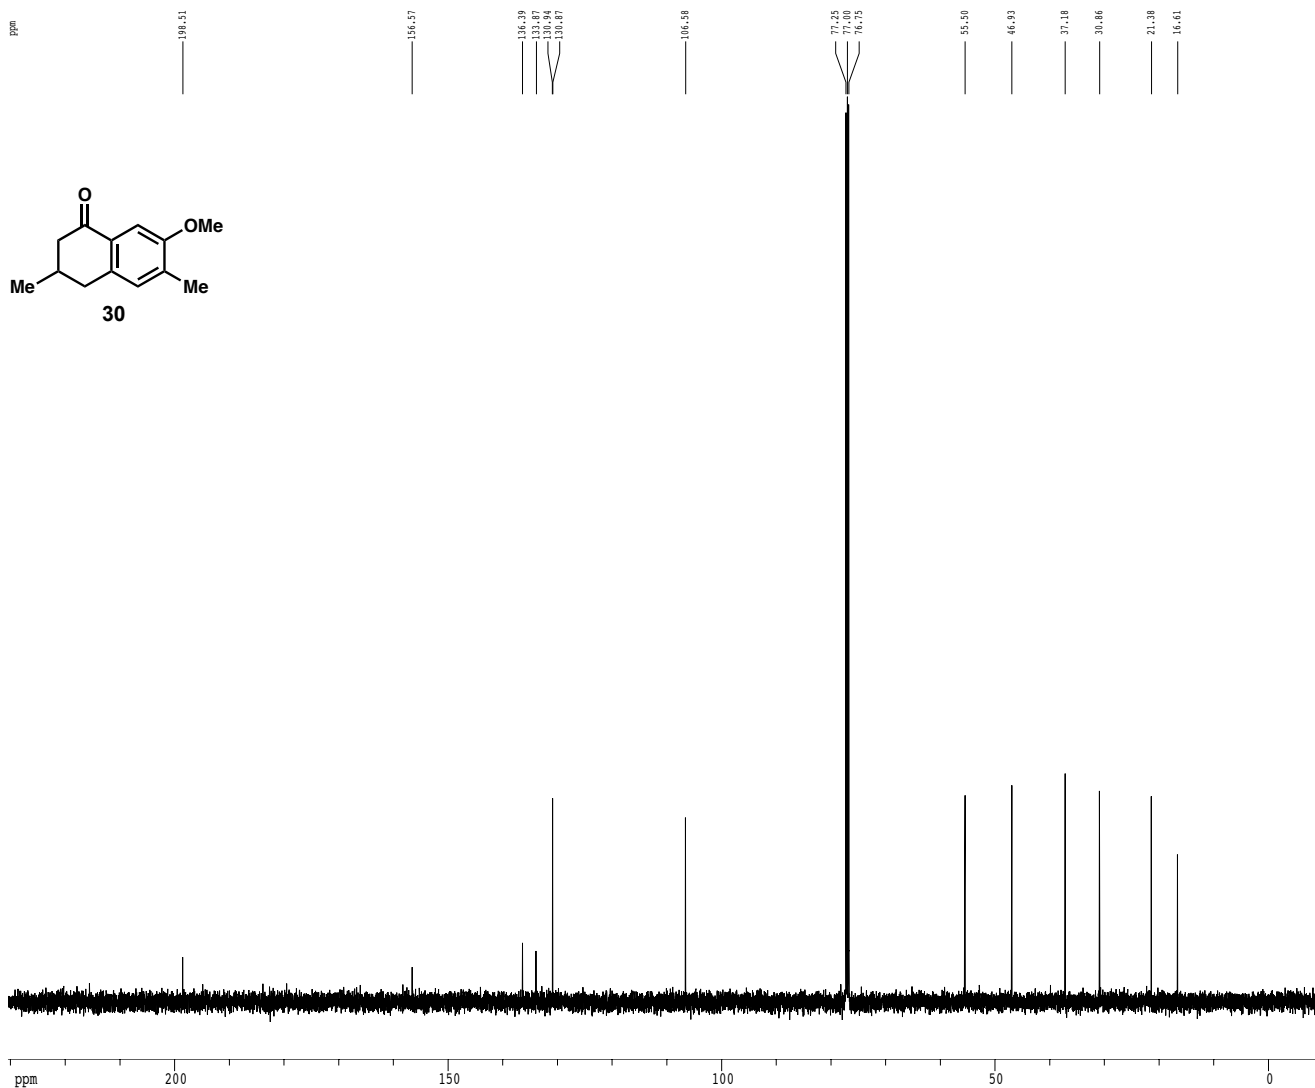

```

Current Data Parameters
USER          roosen
NAME         pcr3.159 isolate
EXPNO        2
PROCNO       1

F2 - Acquisition Parameters
Date_        20140729
Time         9.48
INSTRUM      cryo500
PROBHD       5 mm CP13 1H-
PULPROG      SpinEcho30pp.prd
TD           65536
SOLVENT      CDCl3
NS           232
DS           2
SWEZ         30303.031 Hz
FIDRES       0.462388 Hz
AQ           1.0813940 sec
RG           7296.2
DW           16.500 usec
DE           6.00 usec
TE           298.2 K
D1           0.50000000 sec
d11          0.03000000 sec
D16          0.00000000 sec
d17          0.00019600 sec
MCREST       0.00000000 sec
MCMCR       0.01500000 sec
P2           31.00 usec

===== CHANNEL f1 =====
NUC1         13C
P1           15.50 usec
P11          500.00 usec
P12          2000.00 usec
PL0          120.00 dB
PL1          -1.00 dB
SFO1         125.7942648 MHz
SP1          3.20 dB
SP2          3.20 dB
SPRM1        Crp60,0.5,20.1
SPRM2        Crp60comp.4
SFOFF1       0.00 Hz
SFOFF2       0.00 Hz

===== CHANNEL f2 =====
CPDPRG2      walz16
NUC2         1H
PCPD2        100.00 usec
PL2          1.60 dB
PL12         24.60 dB
SFO2         500.2225011 MHz

===== GRADIENT CHANNEL =====
GPRM1        SINE.100
GPRM2        SINE.100
GF1          0.00 k
GF2          0.00 k
GF3          0.00 k
GF4          0.00 k
GF5          30.00 k
GF6          50.00 k
p15          500.00 usec
p16          1000.00 usec

F2 - Processing parameters
SI           65536
SF           125.7804282 MHz
WDW          EM
SSB          0
LB           1.00 Hz
GB           0
PC           2.00

1D NMR plot parameters
CX           22.80 cm
CY           15.63 cm
F1P          230.637 ppm
F1           29009.68 Hz
F2P          -10.287 ppm
F2           -1293.96 Hz
FPMCM        10.56688 ppm/cm
HMCM         1329.10718 Hz/cm
    
```



1H spectrum

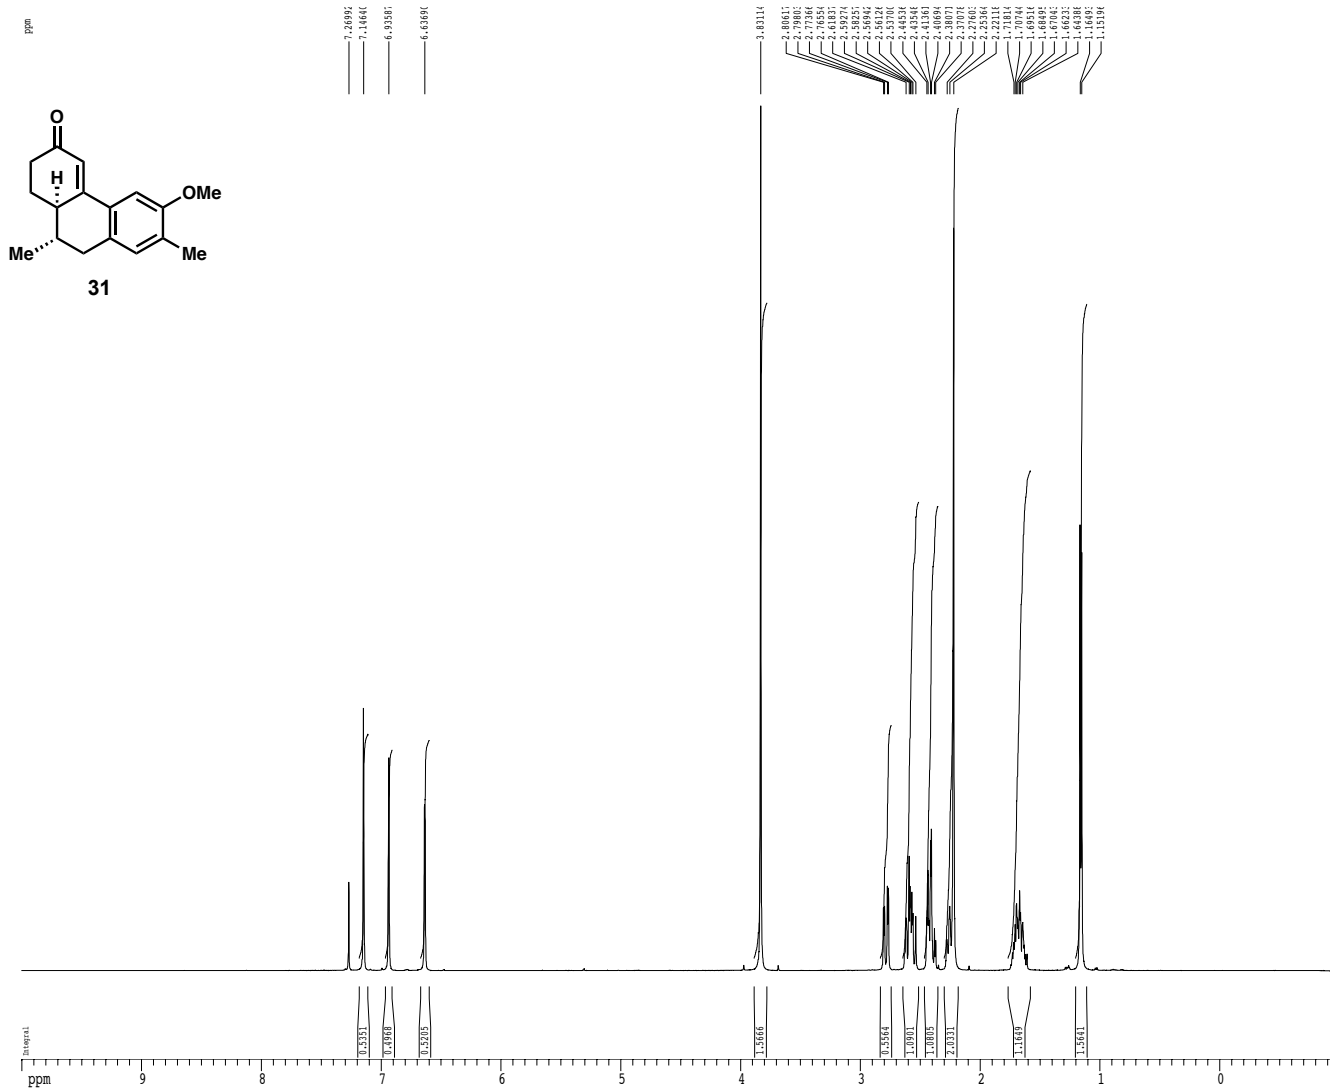

```

Current Data Parameters
USER          roosen
NAME          pcr3.180_cropl
EXPNO        1
PROCNO       1

F2 - Acquisition Parameters
Date_        20140823
Time         12.04
INSTRUM      cryo500
PROBHD       5 mm CPYCI 1H-
PULPROG      zg30
TD           32048
SOLVENT      CDCl3
NS           16
DS           2
SWH          8012.820 Hz
FIDRES       0.250026 Hz
AQ           1.9998451 sec
RG           4.5
DW           62.400 usec
DE           6.00 usec
TE           298.0 K
D1           0.10000000 sec
MCHYST       0.00000000 sec
MCHRX        0.01500000 sec

----- CHANNEL f1 -----
NUC1          1H
P1            7.50 usec
PE1           1.60 GB
SFO1          500.2233015 MHz

F2 - Processing parameters
SI            65536
SF            500.2200263 MHz
WDW           EM
SSB           0
LB            0.30 Hz
GB            0
PC            4.00

1D NMR plot parameters
CX            22.80 cm
CT            15.00 cm
FIP           10.000 ppm
F1            5002.20 Hz
F2            -1.000 ppm
F3            -500.22 Hz
PPHM          0.48246 ppm/cm
HZCM          241.33423 Hz/cm
    
```

Z-restored spin-echo 13C spectrum with 1H decoupling

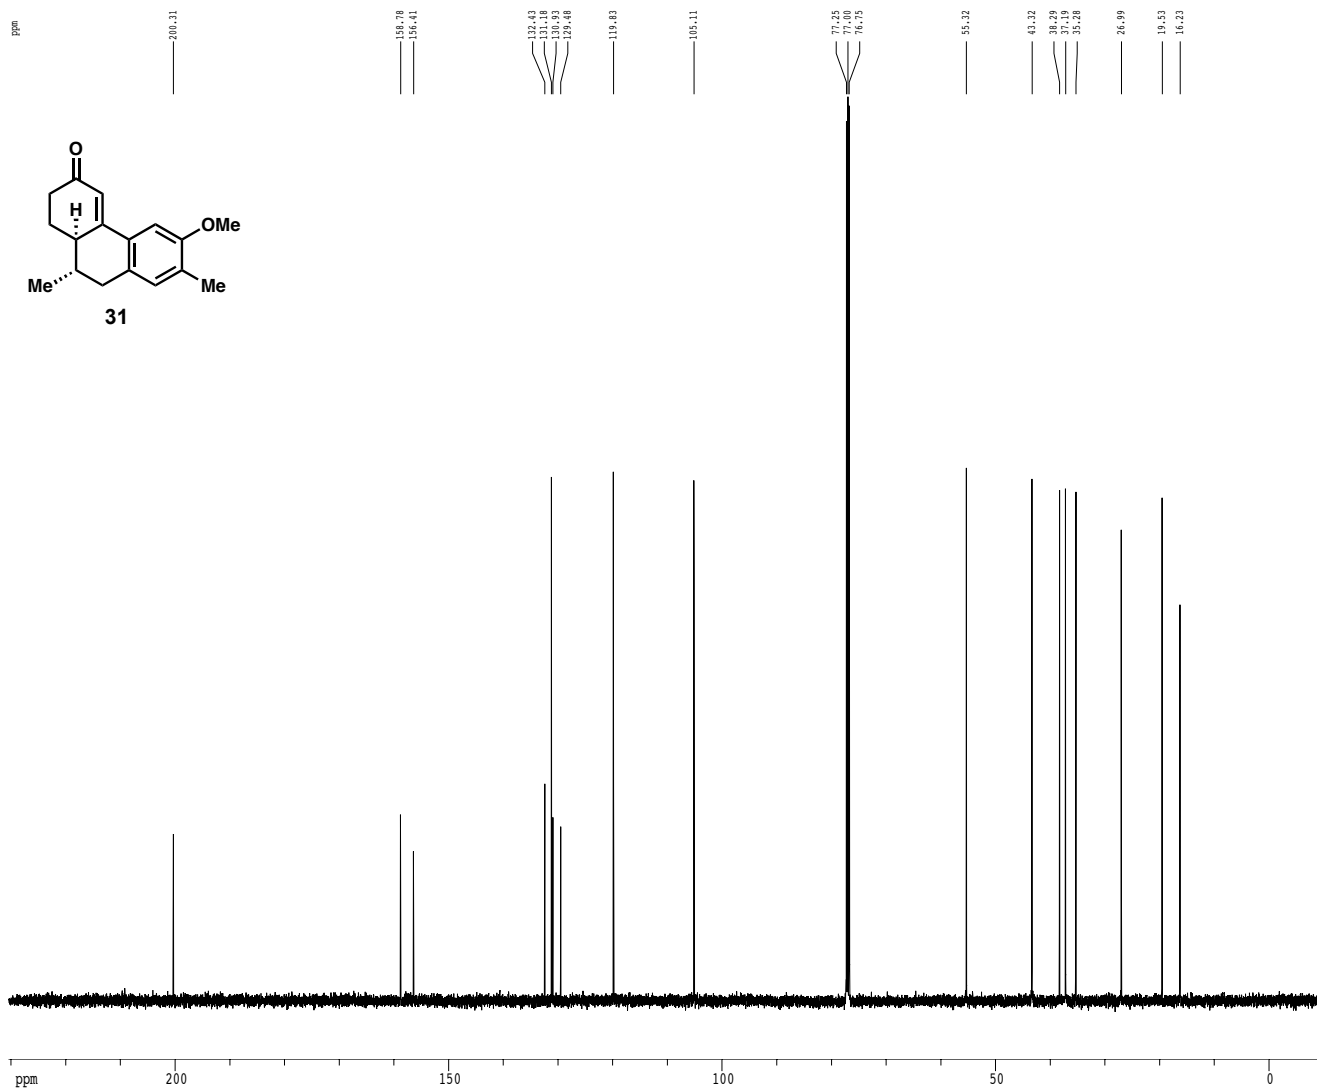

```

Current Data Parameters
USER      roosen
NAME      pcr3.180_crop1
EXPNO     2
PROCNO    1

F2 - Acquisition Parameters
Date_     20140823
Time      12.16
INSTRUM   cryo500
PROBHD    5 mm CPCL 1H-
PULPROG   SpinEcho30pp.prd
TD         65536
SOLVENT   CDCl3
NS         424
DS         2
SWE        30303.031 Hz
FIDRES     0.462388 Hz
AQ          1.0813940 sec
RG          650
DW          16.500 usec
DE           6.00 usec
TE          298.2 K
D1          0.50000000 sec
d11         0.03000000 sec
D16         0.00020000 sec
d17         0.00019600 sec
MCREST     0.00000000 sec
MCMXR      0.01500000 sec
P2          31.00 usec

===== CHANNEL f1 =====
NUC1        13C
P1          15.50 usec
PI1         500.00 usec
PI2         2000.00 usec
PL0         120.00 dB
PL1         -1.00 dB
SFO1        125.7942548 MHz
SP1         3.20 dB
SP2         3.20 dB
SFO2        0.00 MHz
SFOFF1      0.00 Hz
SFOFF2      0.00 Hz

===== CHANNEL f2 =====
CPDPRG2    walz16
NUC2        1H
PCPD2      100.00 usec
PL2         1.60 dB
PL12        24.60 dB
SFO2        500.2225011 MHz

===== GRADIENT CHANNEL =====
GPRAM1     SINE.100
GPRAM2     SINE.100
GX1         0.00 k
GPX2        0.00 k
GPT1        0.00 k
GPT2        0.00 k
GPZ1        30.00 k
GPZ2        50.00 k
p15         500.00 usec
p16         1000.00 usec

F2 - Processing parameters
SI          65536
SF          125.7804295 MHz
WDW         EM
SSB         0
LB          1.00 Hz
GB          0
PC          2.00

1D NMR plot parameters
CX          22.80 cm
CY          15.65 cm
F1P         230.376 ppm
F1          28976.83 Hz
F2P         -10.544 ppm
F2          -1326.25 Hz
FPMCH       10.56667 ppm/cm
H1CH        1329.08020 Hz/cm
    
```

1H spectrum

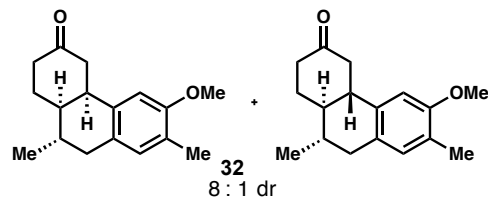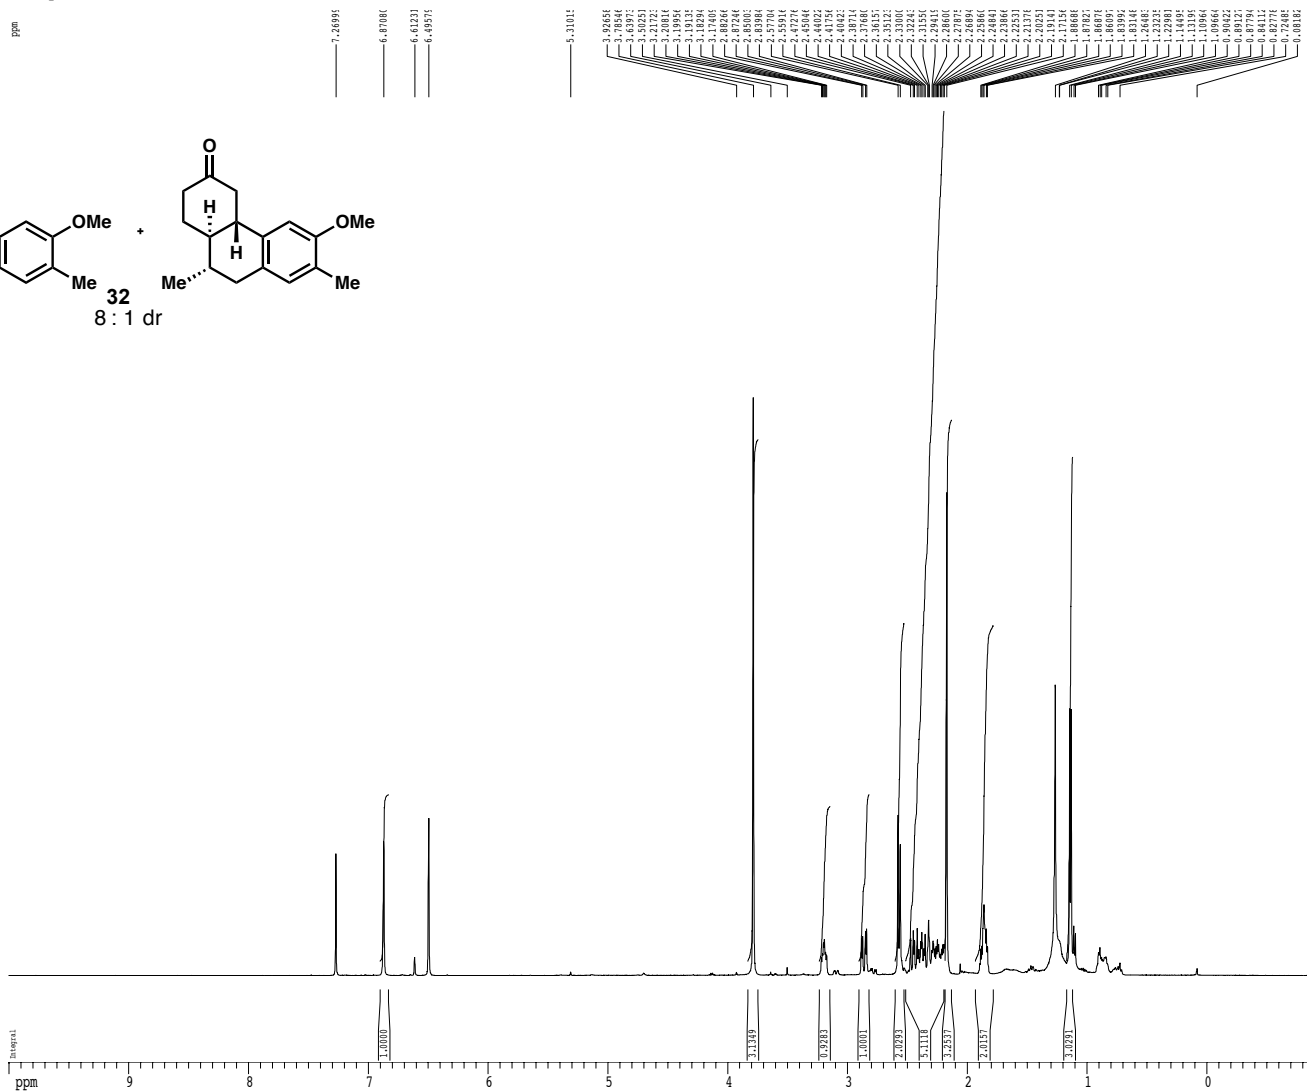

Current Data Parameters  
 USER roosen  
 NAME pcr3.185 isolate  
 EXPNO 1  
 PROCNO 1

F2 - Acquisition Parameters  
 Date\_ 20140816  
 Time 12.46  
 INSTRUM cryo500  
 PROBRD 5 mm CPYC1 1H-  
 PULPROG zg30  
 TD 32048  
 SOLVENT CDCl3  
 NS 16  
 DS 2  
 SWH 8012.820 Hz  
 FIDRES 0.250026 Hz  
 AQ 1.9998451 sec  
 RG 5  
 DW 62.400 usec  
 DE 6.00 usec  
 TE 298.0 K  
 D1 0.10000000 sec  
 WCHST 0.00000000 sec  
 MCHRX 0.01500000 sec

----- CHANNEL f1 -----  
 NUC1 1H  
 P1 7.50 usec  
 PE1 1.60 dB  
 SFO1 500.2239015 MHz

F2 - Processing parameters  
 SI 65536  
 SF 500.2200263 MHz  
 WDW EM  
 SSB 0  
 LB 0.30 Hz  
 GB 0  
 PC 0.10

1D NMR plot parameters  
 CX 22.80 cm  
 CT 10.00 cm  
 FIP 10.000 ppm  
 FI 5002.20 Hz  
 FFP -1.000 ppm  
 FQ -500.22 Hz  
 PPMCM 0.48246 ppm/cm  
 HZCM 241.33423 Hz/cm

Z-restored spin-echo 13C spectrum with 1H decoupling

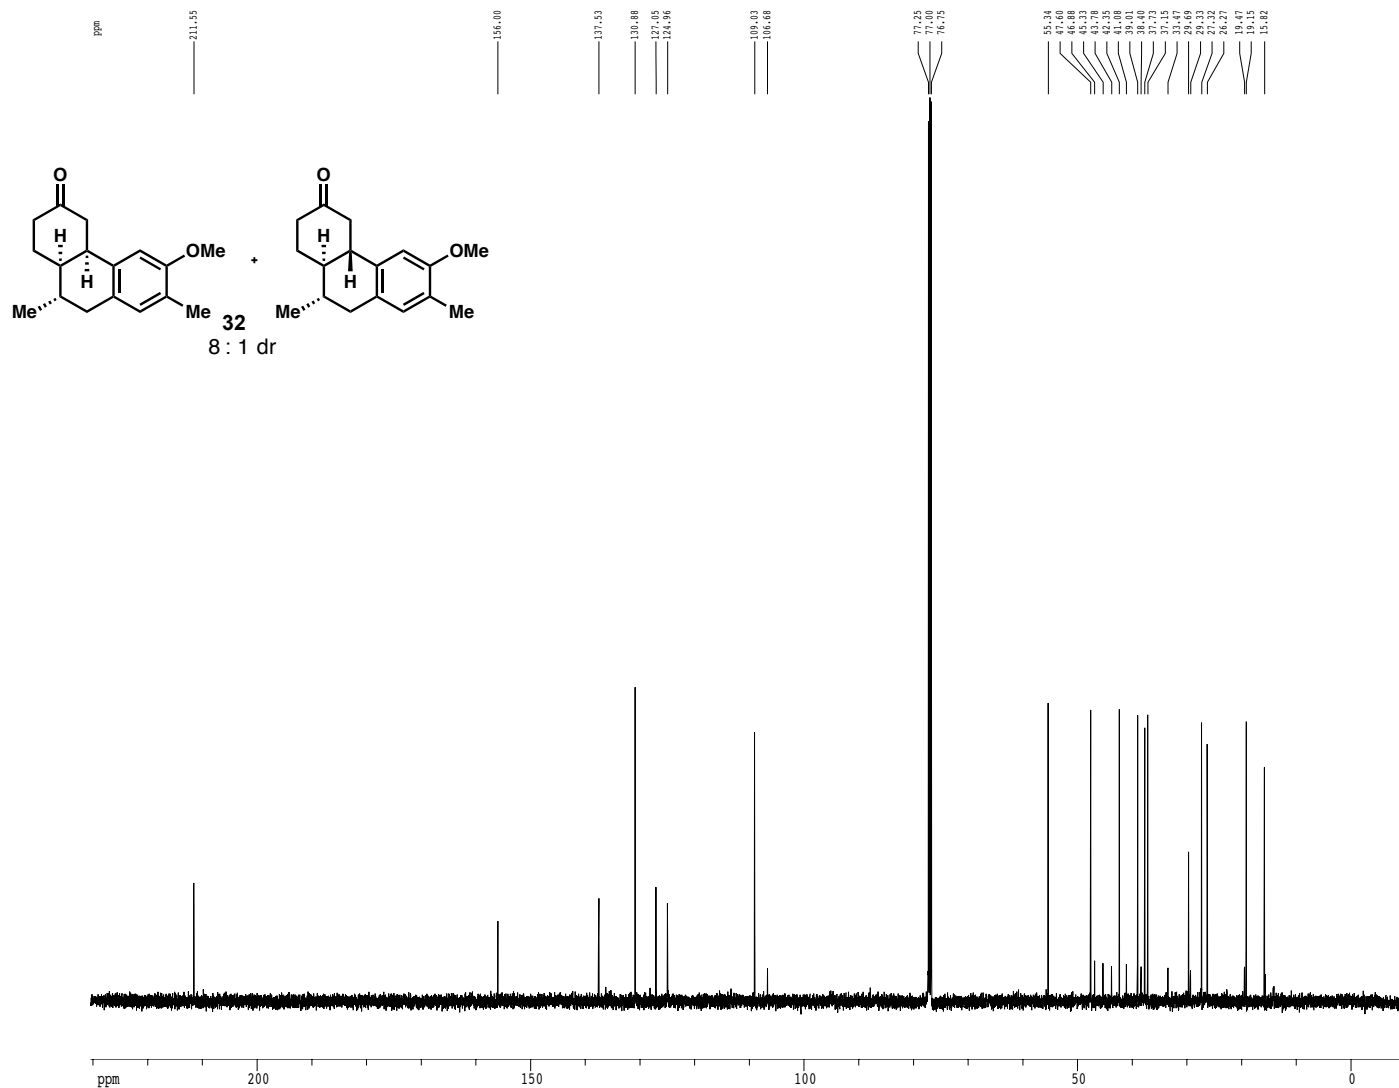

```

Current Data Parameters
USER          roosen
NAME         pcr3.185_isolate
EXPNO        2
PROCNO       1

F2 - Acquisition Parameters
Date_         20140816
Time_        12.51
INSTRUM      cryo500
PROBHD       5 mm CPCL 1H-
PULPROG      SpinEcho30pp.prd
TD           65536
SOLVENT      CDCl3
NS           2
DS           4
SWH          30303.031 Hz
FIDRES       0.462388 Hz
AQ           1.0813940 sec
RG           7296.2
DW           16.500 usec
DE           6.00 usec
TE           298.2 K
D1           0.50000000 sec
d11          0.03000000 sec
D16          0.00020000 sec
d17          0.00019600 sec
MCREST       0.00000000 sec
MCMRST       0.01500000 sec
P2           31.00 usec

===== CHANNEL f1 =====
NUC1         13C
P1           15.50 usec
PL1          500.00 usec
PL2          2000.00 usec
PL0          120.00 dB
PL1          -1.00 dB
SFO1         125.7942548 MHz
SP1          3.20 dB
SP2          3.20 dB
SFO2         Cmp60,0.5,20.1
SFO3         Cmp60comp,4
SFOFF1       0.00 Hz
SFOFF2       0.00 Hz

===== CHANNEL f2 =====
CPDPRG2      walz16
NUC2         1H
PCPD2        100.00 usec
PL2          1.60 dB
PL12         24.60 dB
SFO2         500.2225011 MHz

===== GRADIENT CHANNEL =====
GPRAM1       SINE.100
GPRAM2       SINE.100
GX1          0.00 k
GPX2         0.00 k
GPT1         0.00 k
GPT2         0.00 k
GPT3         30.00 k
GPT4         50.00 k
p15          500.00 usec
p16          1000.00 usec

F2 - Processing parameters
SI           65536
SF           125.7804286 MHz
WDW          EM
SSB          0
LB           1.00 Hz
GB           0
PC           2.00

1D NMR plot parameters
CX           22.80 cm
CY           15.65 cm
F1P         230.384 ppm
F1          28977.75 Hz
F2P         -10.536 ppm
F2          -1235.2 Hz
FPMCM       10.56667 ppm/cm
H1CH        1329.08032 Hz/cm
    
```

deptq 13C spectrum with 1H decoupling (CH & CH3 one way up; C, CH2 and solvent the other)

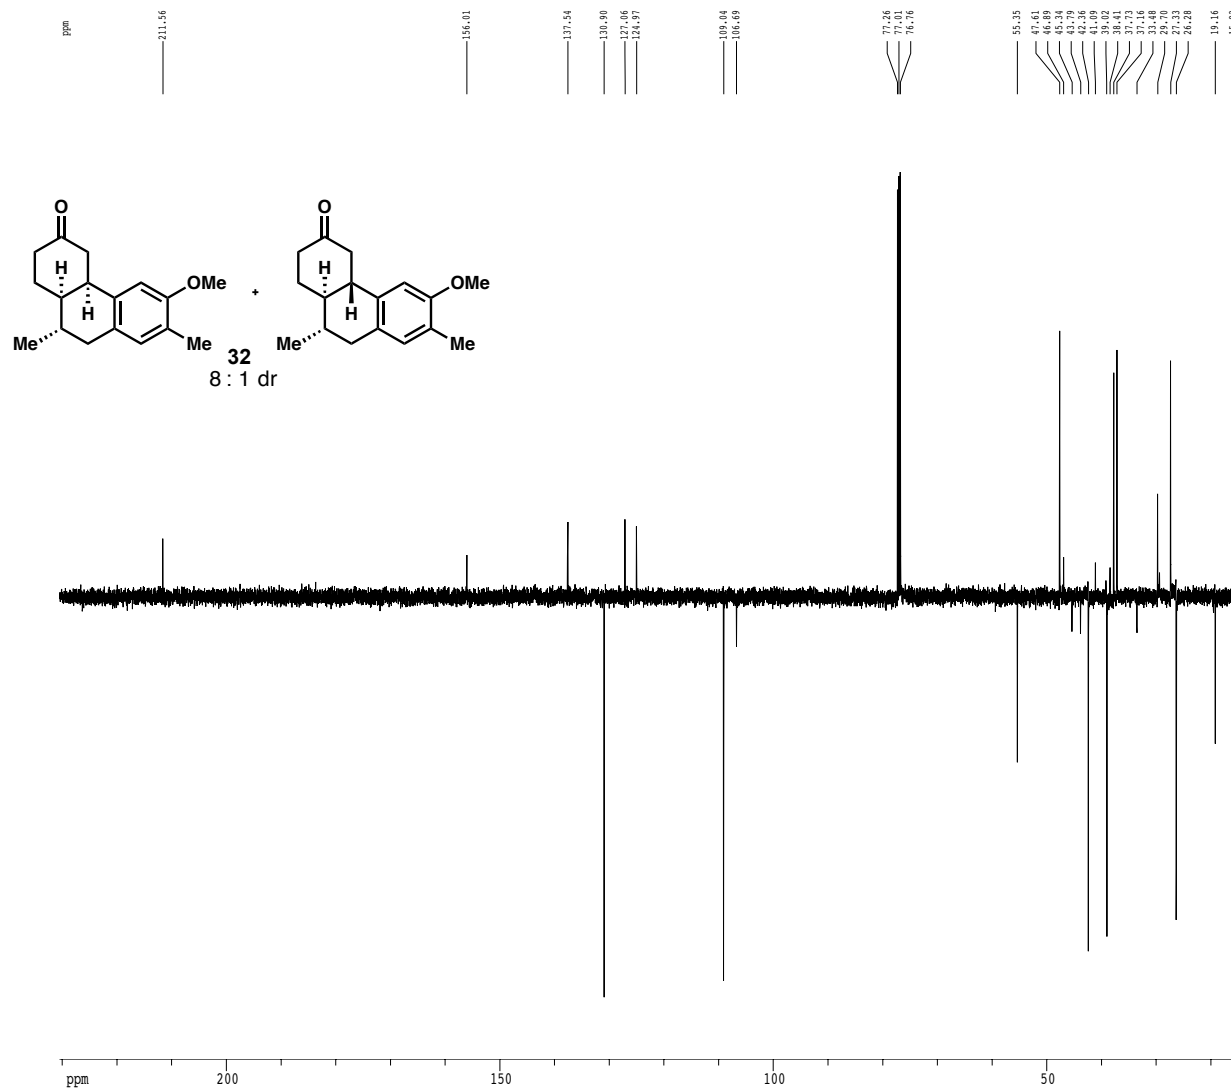

```

Current Data Parameters
USER      roosen
NAME      pcr3.185_isolate
EXPNO     3
PROCNO    1

F2 - Acquisition Parameters
Date_     20140816
Time      13.00
INSTRUM   cryo500
PROBHD    5 mm CPCCI 1H-
PULPROG   deptqqppp
TD         65536
SOLVENT   CDCl3
NS         152
DS         2
SHE       30303.011 Hz
FIDRES    0.462388 Hz
AQ         1.0813940 sec
RG         5169.6
DW         16.500 usec
DE         6.00 usec
TE         298.0 K
CSTF2     145.0000000
CHSTF12   1.5000000
D1         1.00000000 sec
d2         0.00344828 sec
d12        0.0002000 sec
D16        0.00020000 sec
DELTA     0.0001574 sec
DELTA1    0.00227878 sec
DELTA2    0.00226378 sec
DELTA3    0.00224828 sec
MCREST    0.00000000 sec
MORPH     0.03000000 sec

===== CHANNEL f1 =====
NUC1       13C
P1         15.50 usec
P12        2000.00 usec
PL0        120.00 dB
PL1        -1.00 dB
SFO1       125.7942548 MHz
SF2        3.20 dB
SFOA2      Crp60comp.4
SPOFF2     0.00 Hz

===== CHANNEL f2 =====
CPDPRG2    waltz16
NUC2       1H
p0         11.25 usec
P3         7.50 usec
p4         15.00 usec
PCPD2     100.00 usec
PL2        1.60 dB
PL12       24.60 dB
SFO2       500.2225011 MHz

===== GRADIENT CHANNEL =====
GPMAM1     SINE.100
GPMAM2     SINE.100
GPMAM3     SINE.100
GX1        0.00 %
GPX2       0.00 %
GPX3       0.00 %
GPT1       0.00 %
GPY2       0.00 %
GPY3       0.00 %
GPE1       31.00 %
GPE2       31.00 %
GPE3       31.00 %
P16        1000.00 usec

F2 - Processing parameters
SI         65536
SF         125.7604272 MHz
WDW        EM
SSB        0
LB         1.00 Hz
GB         0
PC         2.00

1D NMR plot parameters
CX         22.80 cm
CY         7.50 cm
FIP        230.395 ppm
FI         28979.14 Hz
F2P        -10.525 ppm
F2         -1323.89 Hz
FPMCH     10.5667 ppm/cm
HSCM      1329.08032 Hz/cm
    
```

ghmqc

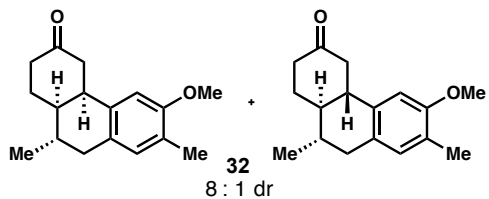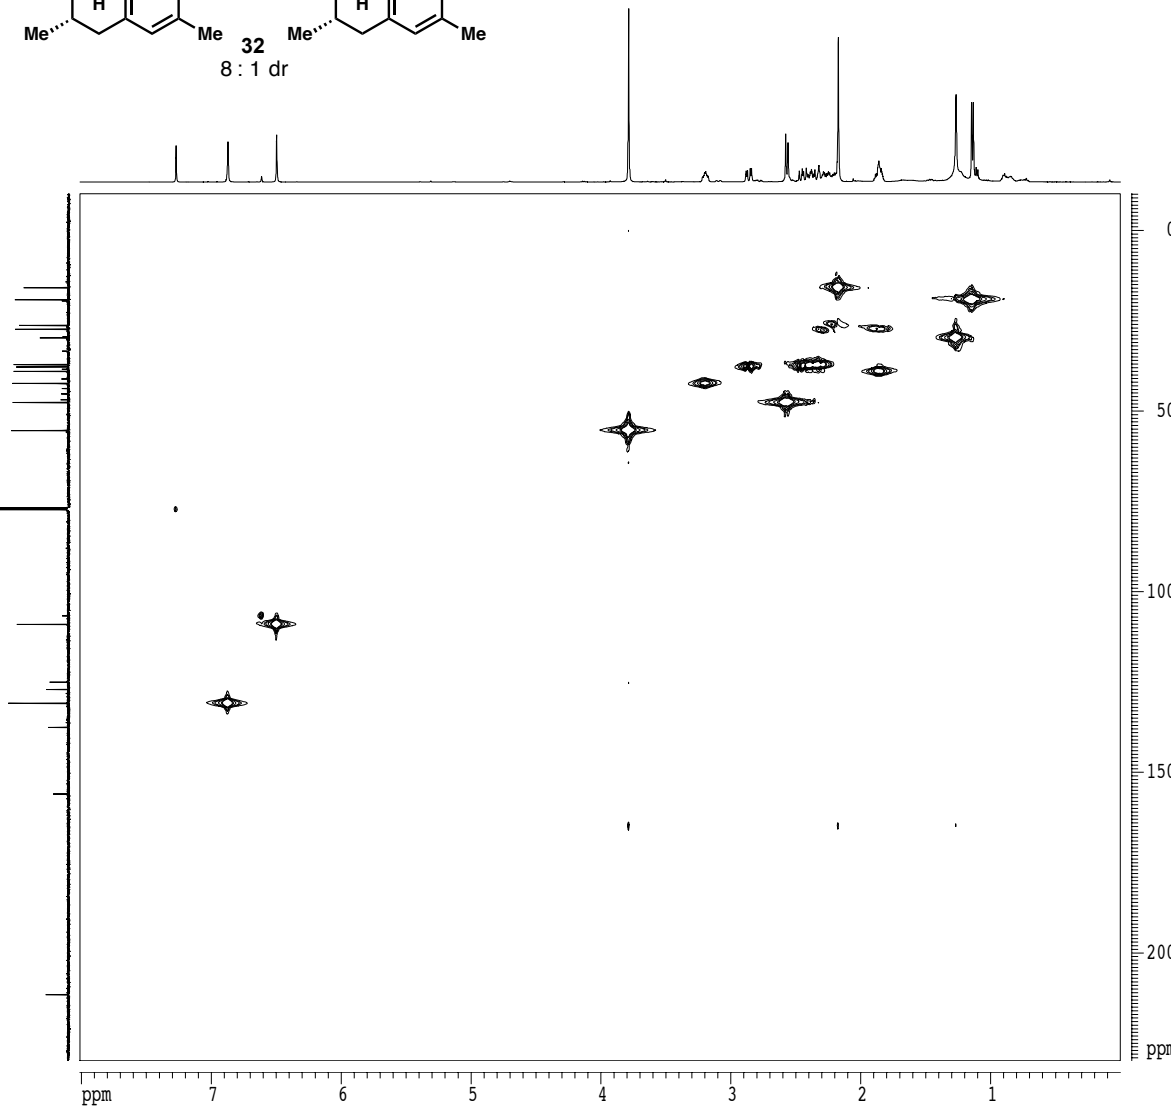

```
Current Data Parameters
USER roosen
NAME pcr3.185_isolate
EXPNO 4
PROCNO 1

F2 - Acquisition Parameters
Date_ 20140816
Time 13.03
INSTRUM cryo500
PROBHD 5 mm CPYCI 1H-
PULPROG invtqg.wu
TD 2048
SOLVENT CDCl3
NS 2
DS 16
SHS 4006.410 Hz
FIDRES 1.956255 Hz
AQ 0.2556404 sec
RG 11585.2
DM 124.800 usec
DE 6.50 usec
TE 298.0 K
CNST2 145.0000000
d0 0.0000000 sec
d1 1.0000000 sec
d2 0.00344828 sec
d12 0.0002000 sec
d13 0.0000000 sec
D16 0.0002000 sec
d20 0.00242528 sec
INW 0.0001155 sec

===== CHANNEL f1 =====
NUC1 1H
P1 7.50 usec
p2 15.00 usec
PL1 1.00 dB
SFO1 500.2220272 MHz

===== CHANNEL f2 =====
CPDPRG2 qnfp
NUC2 13C
P3 15.50 usec
PCPD2 65.00 usec
PL2 -1.00 dB
PL12 11.30 dB
SFO2 125.7842548 MHz

===== GRADIENT CHANNEL =====
GPMAM1 sine.100
GPMAM2 sine.100
GPMAM3 sine.100
GPX1 0.00 %
GPX2 0.00 %
GPX3 0.00 %
GPY1 0.00 %
GPY2 0.00 %
GPY3 0.00 %
GPI1 30.00 %
GPI2 18.00 %
GPI3 24.00 %
PI6 1000.00 usec

F1 - Acquisition parameters
ND0 2
TD 128
SFO1 125.7843 MHz
FIDRES 235.849060 Hz
SN 239.985 ppm
PnMODE undefined

F2 - Processing parameters
SI 1024
SF 500.220033 MHz
WDW EM
SSB 0
LB 5.00 Hz
GB 0
PC 4.00

F1 - Processing parameters
SI 1024
MC2 QF
SF 125.7804344 MHz
WDW QSINE
SSB 3
LB 0.00 Hz
GB 0

2D NMR plot parameters
CY2 18.00 cm
CX1 15.00 cm
F2PLO 8.011 ppm
F2LO 40071.1 Hz
F2PHI 0.001 ppm
F2HI 0.70 Hz
F1PLO 239.844 ppm
F1LO 28909.83 Hz
F1PHI -10.167 ppm
F1HI -1278.85 Hz
F2PPMCH 0.44496 ppm/cm
F2HZCH 222.57834 Hz/cm
F1PPMCH 16.00073 ppm/cm
F1HZCH 2012.57849 Hz/cm
```

<sup>1</sup>H spectrum

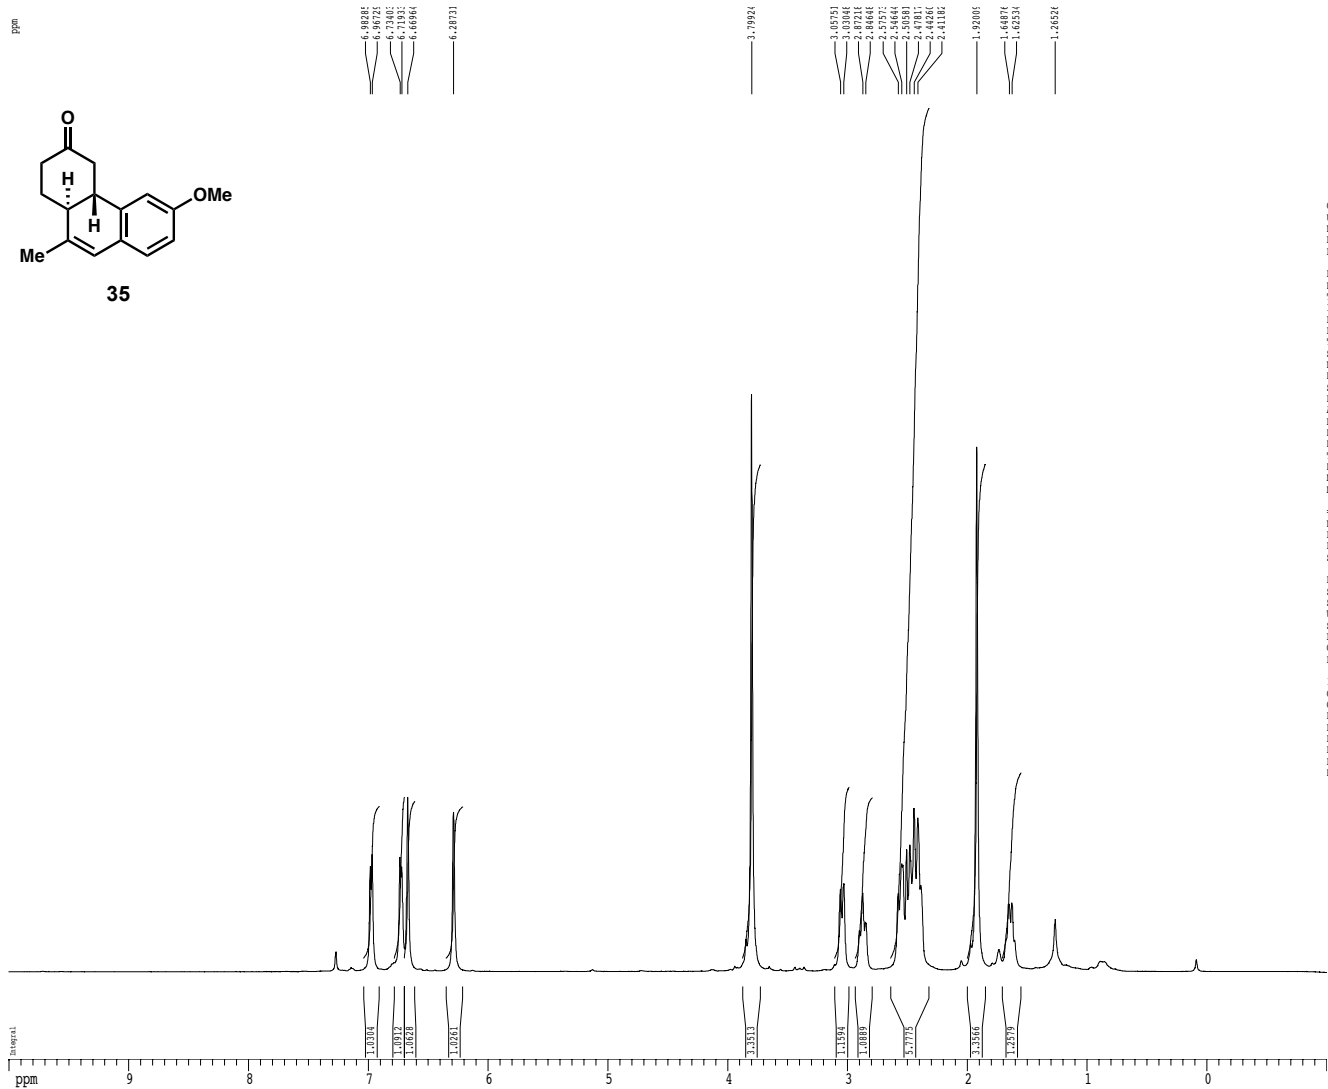

Current Data Parameters  
 USER roosen  
 NAME pcr4.015\_isolate  
 EXPNO 1  
 PROCNO 1

F2 - Acquisition Parameters  
 Date\_ 20141220  
 Time 13.02  
 INSTRUM cryo500  
 PROBP0 5 mm CPYCI 1H-  
 PULPROG zg30  
 TD 32048  
 SOLVENT CDCl3  
 NS 8  
 DS 2  
 SWH 8012.820 Hz  
 FIDRES 0.250026 Hz  
 AQ 1.9998451 sec  
 RG 4.5  
 DW 62.400 usec  
 DE 6.00 usec  
 TE 298.0 K  
 D1 0.10000000 sec  
 MCHRES 0.00000000 sec  
 MCHW 0.01500000 sec

----- CHANNEL f1 -----  
 NUC1 1H  
 P1 7.50 usec  
 PL1 1.60 dB  
 SFO1 500.2239015 MHz

F2 - Processing parameters  
 SI 65536  
 SF 500.220266 MHz  
 WDW EM  
 SSB 0  
 LB 0.30 Hz  
 GB 0  
 PC 4.00

1D NMR plot parameters  
 CX 22.80 cm  
 CF 10.00 cm  
 FIP 10.000 ppm  
 F1 5002.20 Hz  
 F0 -1.000 ppm  
 F2 -500.22 Hz  
 PPM0 0.48246 ppm/cm  
 HZ0M 241.33423 Hz/cm

Z-restored spin-echo 13C spectrum with 1H decoupling

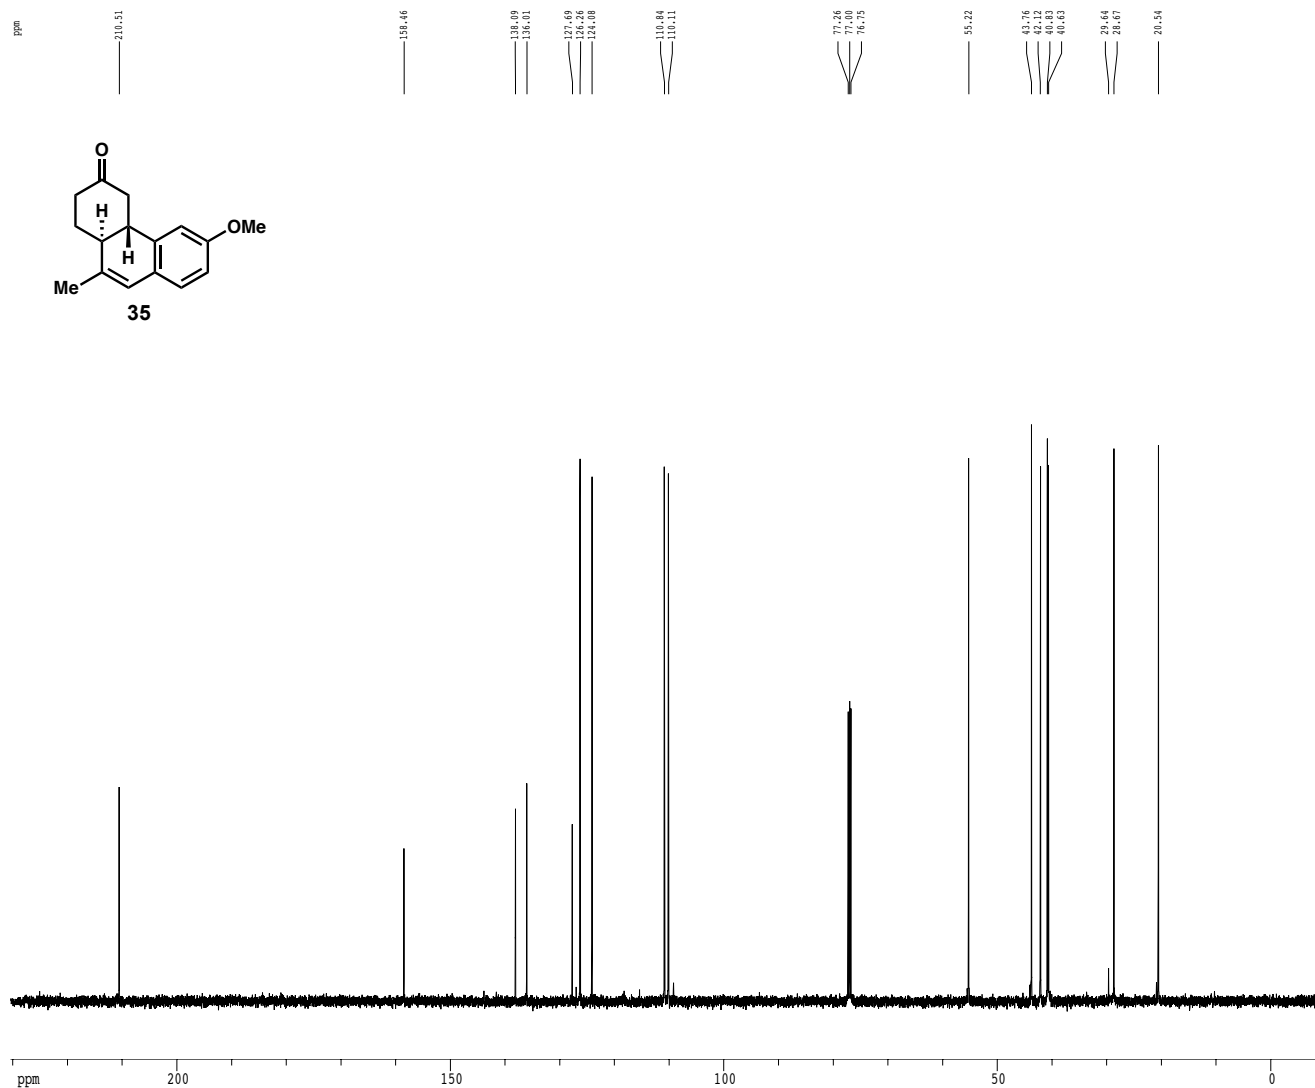

```

Current Data Parameters
USER          roosen
NAME         pcr4.015_isolate
EXPNO        2
PROCNO       1

F2 - Acquisition Parameters
Date_        20141220
Time         13.04
INSTRUM     cryo500
PROBHD      5 mm CPCLP 1H-
PULPROG     SpinEcho30pp.prd
TD           65536
SOLVENT     CDCl3
NS           2
DS           152
SWH          30303.031 Hz
FIDRES       0.462388 Hz
AQ           1.0813940 sec
RG           8192
DW           16.500 usec
DE           6.00 usec
TE           298.2 K
D1           0.50000000 sec
d11          0.03000000 sec
D16          0.00020000 sec
d17          0.00019600 sec
MCREST       0.00000000 sec
MCMCR       0.01500000 sec
P2           33.10 usec

===== CHANNEL f1 =====
NUC1         13C
P1           16.55 usec
PL1         500.00 usec
PL2         2000.00 usec
PL0         120.00 dB
PL1         -1.00 dB
SFO1        125.7942548 MHz
SF1         2.70 dB
SF2         2.70 dB
SFO2        Cmp60,0.5,20.1
SFO3        Cmp60comp.4
SFOFF1       0.00 Hz
SFOFF2       0.00 Hz

===== CHANNEL f2 =====
CPDPRG2     walz16
NUC2         1H
PCPD2       100.00 usec
PL2         1.60 dB
PL12        24.50 dB
SFO2        500.2225011 MHz

===== GRADIENT CHANNEL =====
GPRAM1      SINE.100
GPRAM2      SINE.100
GX1         0.00 k
GX2         0.00 k
GP11        0.00 k
GP12        0.00 k
GP21        30.00 k
GP22        50.00 k
p15         500.00 usec
p16         1000.00 usec

F2 - Processing parameters
SI           65536
SF           125.7804351 MHz
WDW          EM
SSB          0
LB           1.00 Hz
GB           0
PC           2.00

1D NMR plot parameters
CX           22.80 cm
CY           10.00 cm
F1P         230.332 ppm
F1          28971.28 Hz
F2P         -10.588 ppm
F2          -1331.75 Hz
FPMCH       10.56667 ppm/cm
H1CH       1329.08032 Hz/cm
    
```



1H spectrum

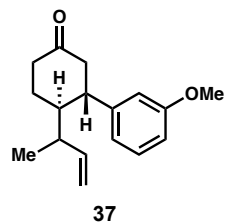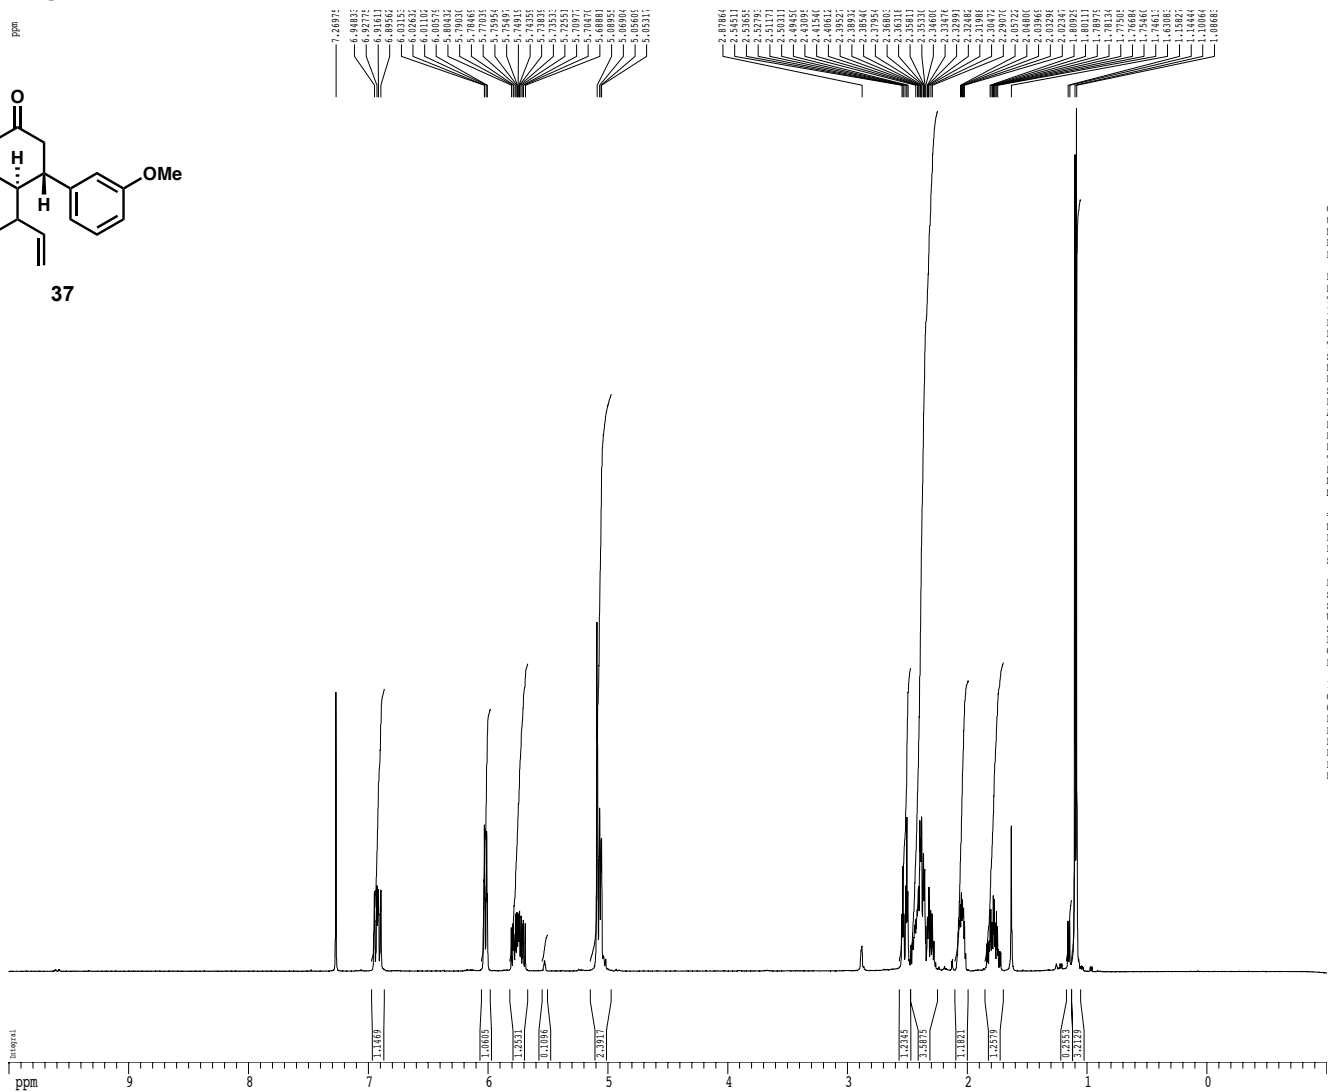

Current Data Parameters  
 USER roosen  
 NAME pcr4.115.77-80  
 EXNO 1  
 PROCNO 1

F2 - Acquisition Parameters  
 Date\_ 20150417  
 Time 13.43  
 INSTRUM cryo500  
 PROBD 5 mm CPYC1 1H-  
 PULPROG zg30  
 TD 32048  
 SOLVENT CDCl3  
 NS 8  
 DS 2  
 SWH 8012.820 Hz  
 FIDRES 0.250026 Hz  
 AQ 1.9998451 sec  
 RG 5.7  
 DW 62.400 usec  
 DE 6.00 usec  
 TE 298.0 K  
 DI 0.10000000 sec  
 WREST 0.00000000 sec  
 MCHRX 0.01500000 sec

----- CHANNEL f1 -----  
 NU01 1H  
 P1 7.50 usec  
 PL1 1.60 dB  
 SFO1 500.2233015 MHz  
 F2 - Processing parameters  
 SI 65536  
 SF 500.220265 MHz  
 WDW EM  
 SSB 0  
 LB 0.30 Hz  
 GB 0  
 PC 4.00

1D NMR plot parameters  
 CX 22.80 cm  
 CF 15.00 cm  
 FIP 10.000 ppm  
 FI 5002.20 Hz  
 FFP -1.000 ppm  
 FZ -500.22 Hz  
 PPMH 0.48246 ppm/cm  
 HZCM 241.33423 Hz/cm

Z-restored spin-echo 13C spectrum with 1H decoupling

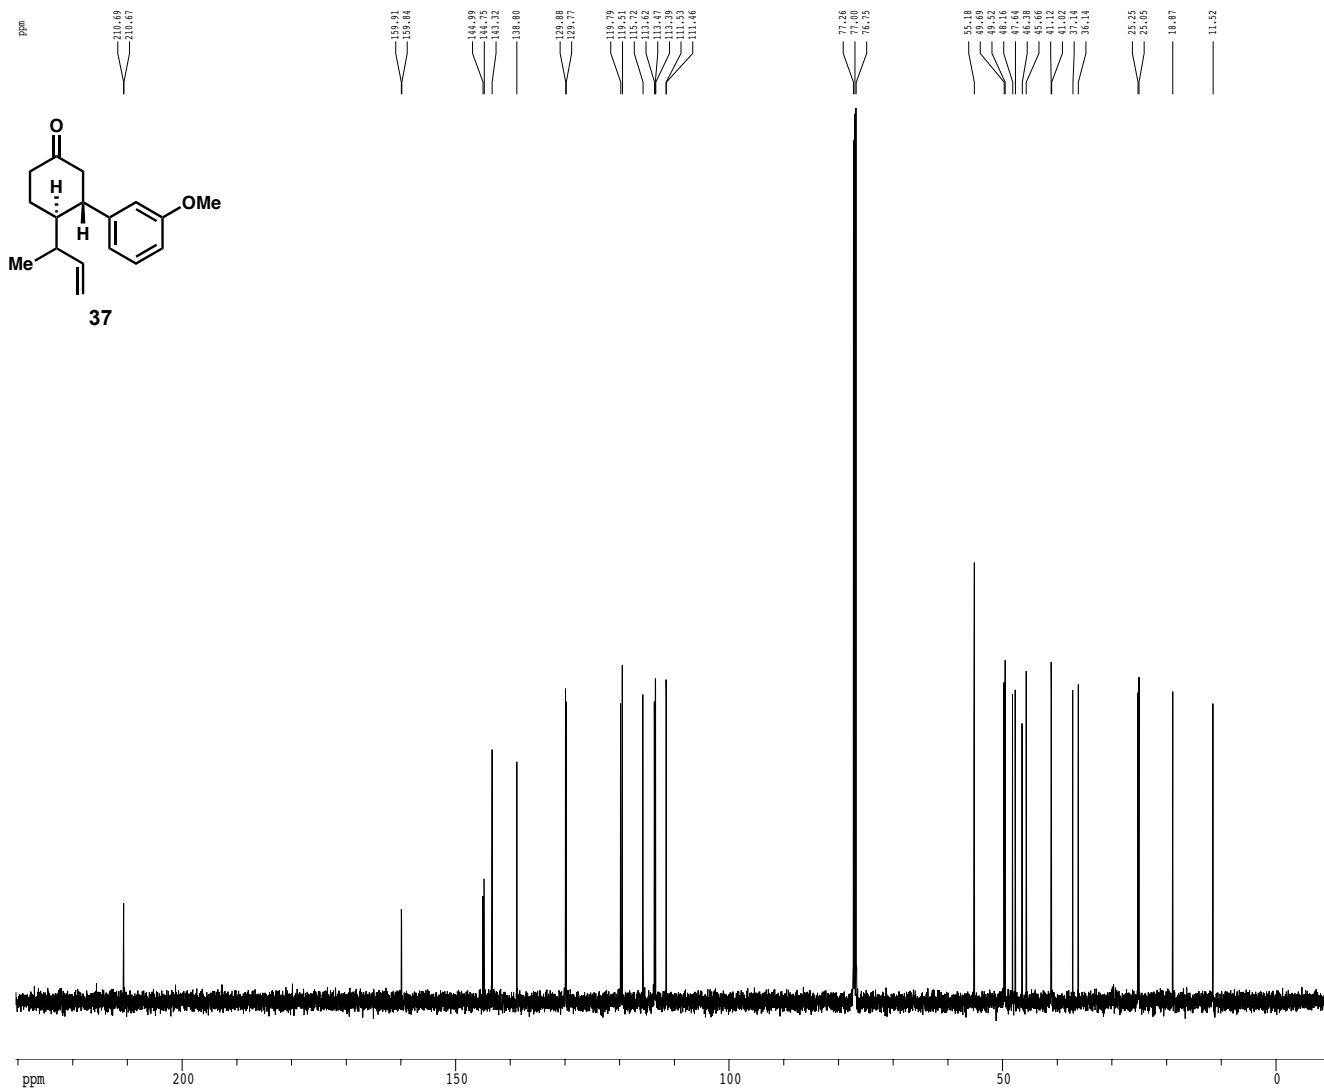

```

Current Data Parameters
USER roosen
NAME pcr4.018_isolate
EXPNO 2
PROCNO 1

F2 - Acquisition Parameters
Date_ 20150109
Time 22.51
INSTRUM cryo500
PROBHD 5 mm CPCL 1H-
PULPROG SpinEcho30pp.prd
TD 65536
SOLVENT CDCl3
NS 368
DS 2
SWE 30303.031 Hz
FIDRES 0.462388 Hz
AQ 1.0813940 sec
RG 7296.2
DW 16.500 usec
DE 6.00 usec
TE 298.2 K
D1 0.50000000 sec
d11 0.03000000 sec
D16 0.00000000 sec
d17 0.00019600 sec
MCREST 0.00000000 sec
MCMCR 0.01500000 sec
P2 33.10 usec

===== CHANNEL f1 =====
NUC1 13C
P1 16.55 usec
P11 500.00 usec
P12 2000.00 usec
PL0 120.00 dB
PL1 -1.00 dB
SFO1 125.7942048 MHz
SP1 2.70 dB
SP2 2.70 dB
SFO2 Cmp60,0.5,20.1
SFO3 Cmp60comp,4
SFOFF1 0.00 Hz
SFOFF2 0.00 Hz

===== CHANNEL f2 =====
CPDPRG2 walz16
NUC2 1H
PCPD2 100.00 usec
PL2 1.60 dB
PL12 24.50 dB
SFO2 500.2225011 MHz

===== GRADIENT CHANNEL =====
GPRAM1 SINE.100
GPRAM2 SINE.100
GX1 0.00 k
GPX2 0.00 k
GPT1 0.00 k
GPT2 0.00 k
GPT3 30.00 k
GPT4 50.00 k
p15 500.00 usec
p16 1000.00 usec

F2 - Processing parameters
SI 65536
SF 125.7804291 MHz
WDW EM
SSB 0
LB 1.00 Hz
GB 0
PC 2.00

1D NMR plot parameters
CX 22.80 cm
CY 15.65 cm
F1P 230.380 ppm
F1 28977.28 Hz
F2P -10.540 ppm
F2 -1235.76 Hz
FPCMC 10.56667 ppm/cm
HCHC 1329.08020 Hz/cm
    
```

1H spectrum

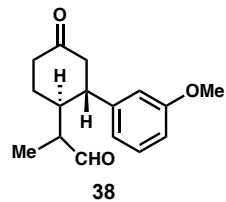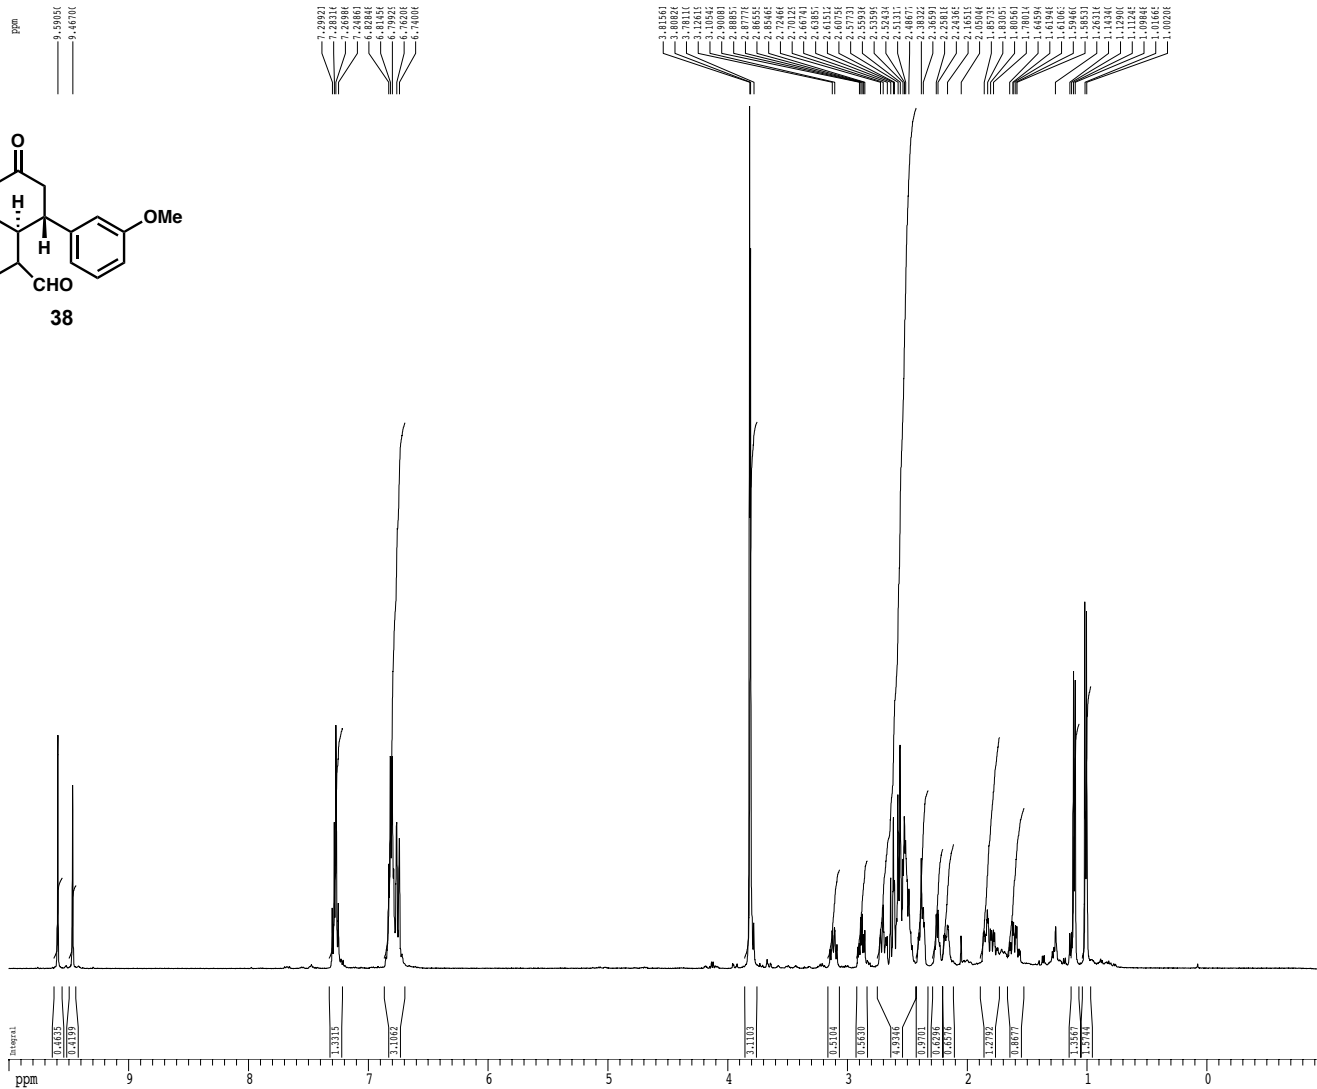

Current Data Parameters  
 USER roosen  
 NAME pcr4.014 isolate  
 EXPNO 1  
 PROCNO 1

F2 - Acquisition Parameters  
 Date\_ 20141218  
 Time 10.47  
 INSTRUM cryo500  
 PROBP0 5 mm CPYC1 1H-  
 PULPROG zg30  
 TD 32048  
 SOLVENT CDCl3  
 NS 8  
 DS 2  
 SWH 8012.820 Hz  
 FIDRES 0.250026 Hz  
 AQ 1.9998451 sec  
 RG 4.5  
 DW 62.400 usec  
 DE 6.00 usec  
 TE 298.0 K  
 D1 0.10000000 sec  
 MCHRES 0.00000000 sec  
 MCHW 0.01500000 sec

----- CHANNEL f1 -----  
 NUC1 1H  
 P1 7.50 usec  
 PL1 1.60 dB  
 SFO1 500.2233015 MHz

F2 - Processing parameters  
 SI 65536  
 SF 500.220266 MHz  
 WDW EM  
 SSB 0  
 LB 0.30 Hz  
 GB 0  
 PC 4.00

1D NMR plot parameters  
 CX 22.80 cm  
 CT 15.00 cm  
 FIP 10.000 ppm  
 F1 5002.20 Hz  
 FFP -1.000 ppm  
 FQ -500.22 Hz  
 PPMH 0.48246 ppm/cm  
 HzCM 241.33423 Hz/cm

Z-restored spin-echo 13C spectrum with 1H decoupling

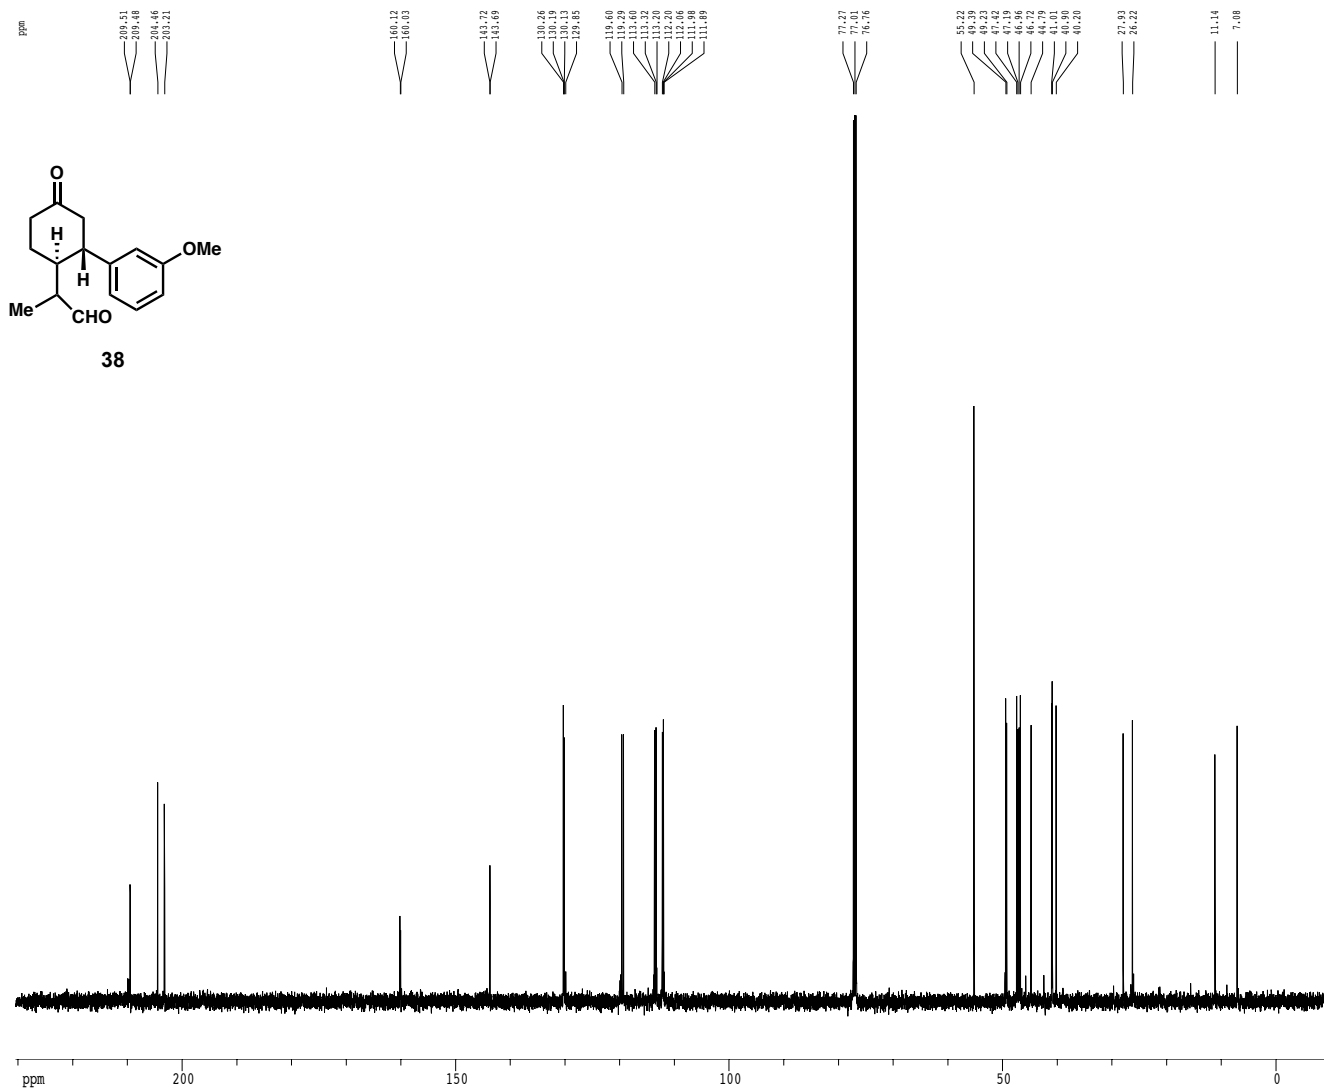

```

Current Data Parameters
USER      roosen
NAME      pcr4.014_isolate
EXPNO    2
PROCNO    1

F2 - Acquisition Parameters
Date_     20141218
Time      10.49
INSTRUM   cryo500
PROBHD    5 mm CPCL 1H-
PULPROG   SpinEcho30pp.prd
TD         65536
SOLVENT   CDCl3
NS         344
DS         2
SWE        30303.031 Hz
FIDRES     0.462388 Hz
AQ          1.0813940 sec
RG          3449.1
DW          16.500 usec
DE           6.00 usec
TE          298.2 K
D1          0.50000000 sec
d11         0.03000000 sec
D16         0.00020000 sec
d17         0.00019600 sec
MCREST     0.00000000 sec
MCHKE      0.01500000 sec
P2          33.10 usec

===== CHANNEL f1 =====
NUC1       13C
P1         16.55 usec
PI1        500.00 usec
PI2        2000.00 usec
PL0        120.00 dB
PL1        -1.00 dB
SFO1       125.7942548 MHz
SF1        2.70 dB
SP2        2.70 dB
SPM1       Crp60,0.5,20.1
SPM2       Crp60comp.4
SFOFF1     0.00 Hz
SFOFF2     0.00 Hz

===== CHANNEL f2 =====
CPDPRG2    walz16
NUC2       1H
PCPD2     100.00 usec
PL2       1.60 dB
PL12      24.50 dB
SFO2     500.2225011 MHz

===== GRADIENT CHANNEL =====
GPRM1     SINE.100
GPRM2     SINE.100
GX1       0.00 k
GPX2      0.00 k
GPT1      0.00 k
GPT2      0.00 k
GPB1      30.00 k
GPB2      50.00 k
p15       500.00 usec
p16       1000.00 usec

F2 - Processing parameters
SI         65536
SF         125.7804286 MHz
WDW        EM
SSB        0
LB         1.00 Hz
GB         0
PC         2.00

1D NMR plot parameters
CX         22.80 cm
CY         15.65 cm
F1P        230.384 ppm
F1         28977.75 Hz
F2P        -10.536 ppm
F2         -1235.2 Hz
FPMCH      10.56667 ppm/cm
H1CH      1329.08032 Hz/cm
    
```

1H spectrum

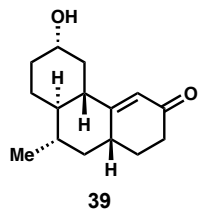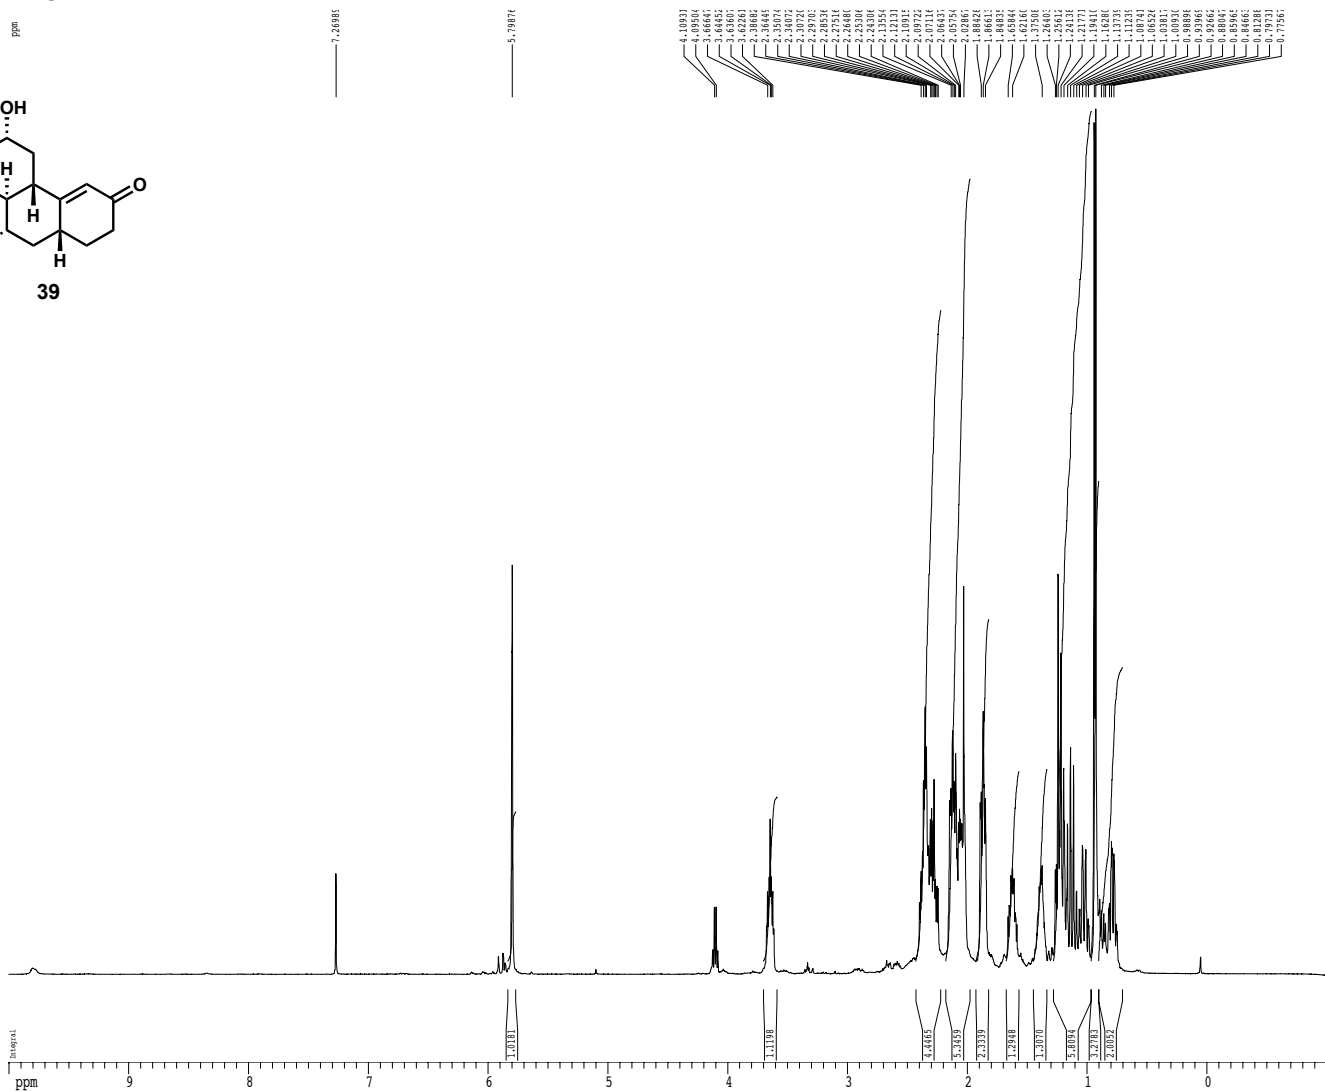

Current Data Parameters  
 USER roosen  
 NAME pcr4.024\_isolate  
 EXPNO 1  
 PROCNO 1

F2 - Acquisition Parameters  
 Date\_ 20150112  
 Time 9.23  
 INSTRUM cryo500  
 PROBRD 5 mm CPYC1 1H-  
 PULPROG zg30  
 TD 32048  
 SOLVENT CDCl3  
 NS 8  
 DS 2  
 SWH 8012.820 Hz  
 FIDRES 0.250026 Hz  
 AQ 1.9998451 sec  
 RG 4.5  
 DW 62.400 usec  
 DE 6.00 usec  
 TE 298.0 K  
 D1 0.10000000 sec  
 MCHRES 0.00000000 sec  
 MCHRX 0.01500000 sec

CHANNEL f1 -----  
 NUC1 1H  
 P1 7.50 usec  
 PL1 1.60 dB  
 SFO1 500.2233015 MHz

F2 - Processing parameters  
 SI 65536  
 SF 500.220262 MHz  
 WDW EM  
 SSB 0  
 LB 0.30 Hz  
 GB 0  
 PC 4.00

1D NMR plot parameters  
 CX 22.80 cm  
 CT 15.00 cm  
 FIP 10.000 ppm  
 F1 5002.20 Hz  
 FFP -1.000 ppm  
 FQ -500.22 Hz  
 FPM 0.48246 ppm/cm  
 HZCM 241.33423 Hz/cm

Z-restored spin-echo 13C spectrum with 1H decoupling

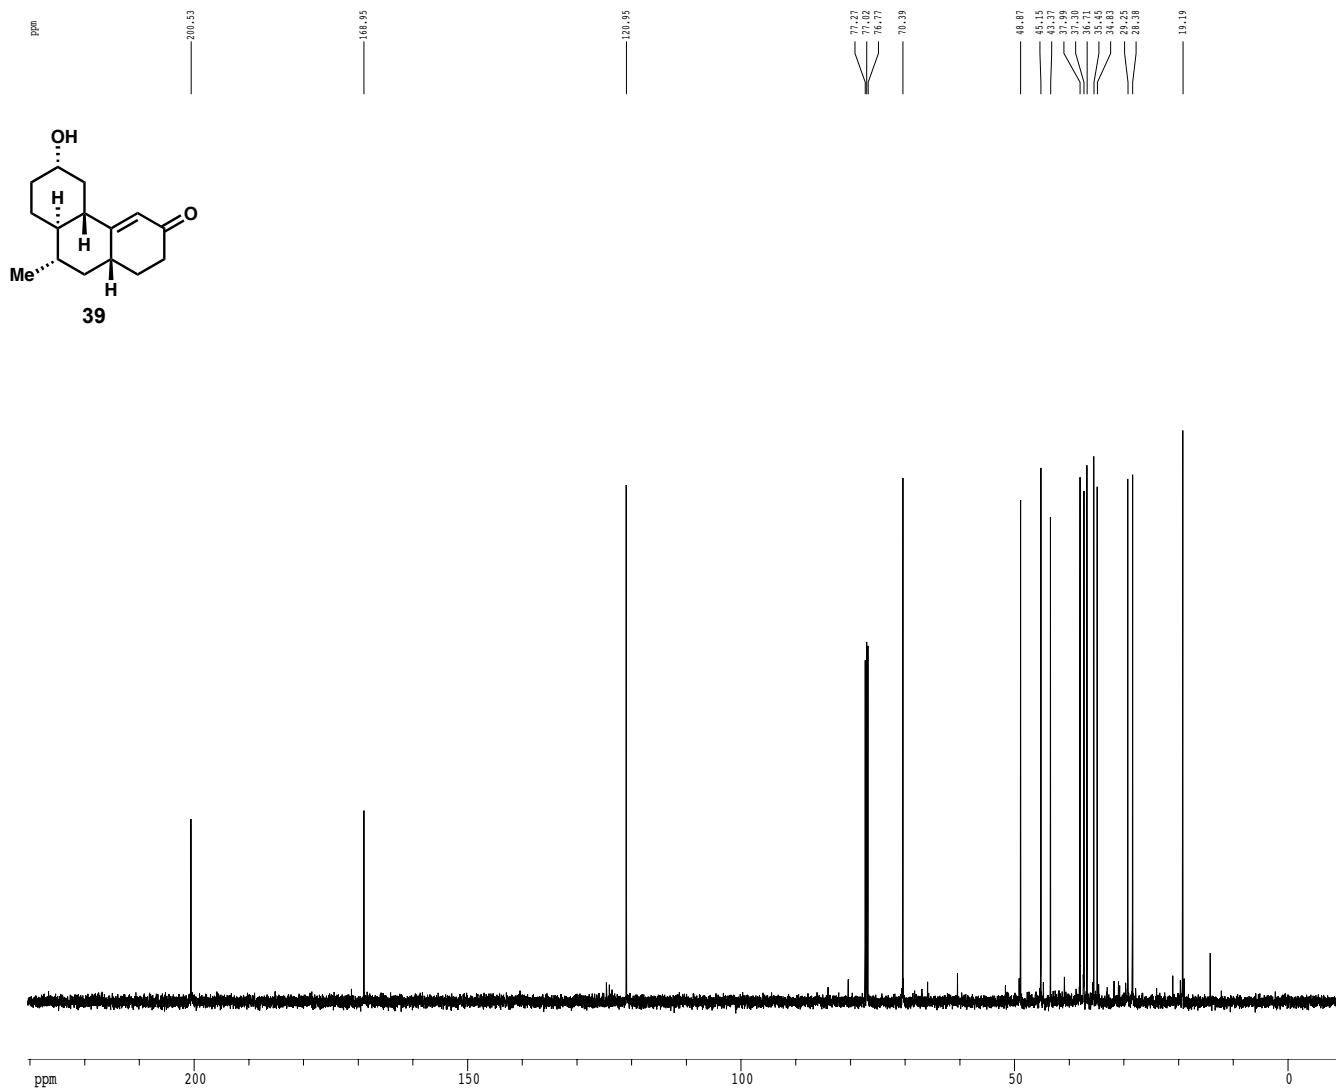

```

Current Data Parameters
USER      roosen
NAME      pcr4.024_isolate
EXPNO     2
PROCNO    1

F2 - Acquisition Parameters
Date_     20150112
Time      9.25
INSTRUM   cryo500
PROBHD    5 mm CP13 1H-
PULPROG   SpinEcho30ppg.prd
TD         65536
SOLVENT   CDCl3
NS         88
DS         2
SWE        30303.031 Hz
FIDRES     0.462388 Hz
AQ         1.0813940 sec
RG         7296.2
DN         16.500 usec
DE         6.00 usec
TE         298.2 K
D1         0.50000000 sec
d11        0.03000000 sec
D16        0.00000000 sec
d17        0.00019600 sec
MCREST     0.00000000 sec
MCMXR     0.01500000 sec
P2         33.10 usec

===== CHANNEL f1 =====
NUC1       13C
P1         16.55 usec
PL1        500.00 usec
P12        2000.00 usec
PL2        120.00 dB
PL12       -1.00 dB
SFO1       125.7942548 MHz
SF1        2.70 dB
SF2        2.70 dB
SFO2       0.00 Hz
SFOFF1     0.00 Hz
SFOFF2     0.00 Hz

===== CHANNEL f2 =====
CPDPRG2    walz16
NUC2       1H
PCPD2     100.00 usec
PL2        1.60 dB
PL12       24.50 dB
SFO2       500.2225011 MHz

===== GRADIENT CHANNEL =====
GPRAM1     SINE.100
GPRAM2     SINE.100
GX1        0.00 k
GPX2       0.00 k
GPT1       0.00 k
GPT2       0.00 k
GPF1       30.00 k
GPF2       50.00 k
p15        500.00 usec
p16        1000.00 usec

F2 - Processing parameters
SI         65536
SF         125.7804319 MHz
WDW        EM
SSB        0
LB         1.00 Hz
GB         0
PC         2.00

1D NMR plot parameters
CX         22.80 cm
CY         10.00 cm
F1P        230.358 ppm
F1         28974.51 Hz
F2P        -10.562 ppm
F2         -1338.52 Hz
FPMCM      10.56667 ppm/cm
H1CH       1329.08032 Hz/cm
    
```

1H spectrum

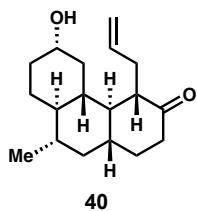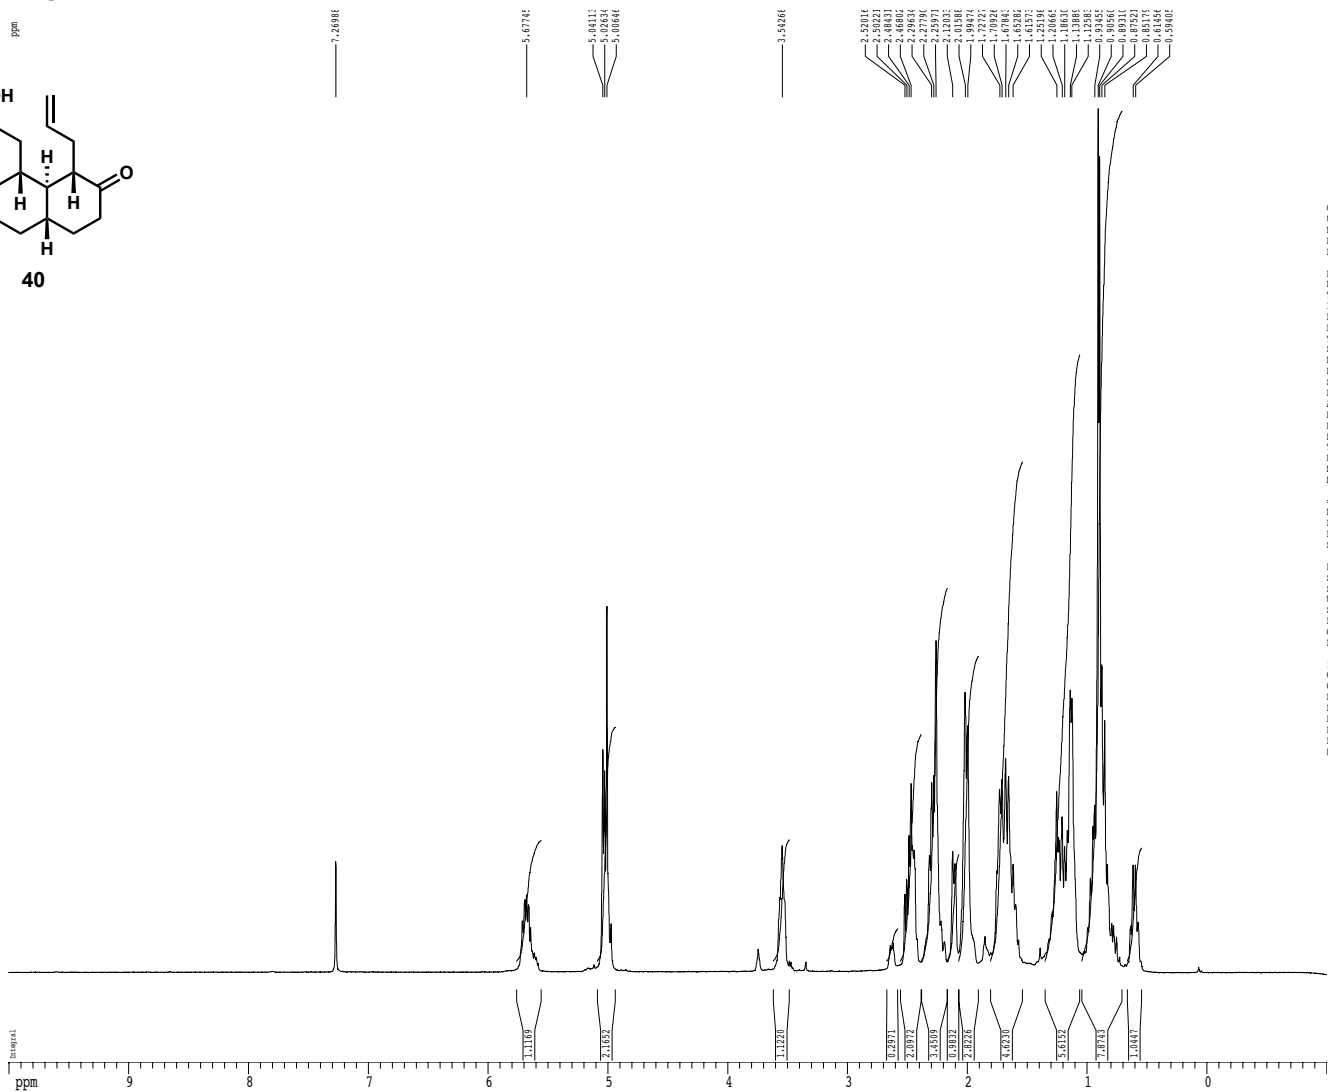

Current Data Parameters  
 USER roosen  
 NAME pcr4.083 monoallyl  
 EXPNO 1  
 PROCNO 1

F2 - Acquisition Parameters  
 Date 20150224  
 Time 23.01  
 INSTRUM cryo500  
 PROBHD 5 mm CPTCI 1H-  
 PULPROG zg30  
 TD 32768  
 SOLVENT CDCl3  
 NS 8  
 DS 2  
 SWH 8012.820 Hz  
 FIDRES 0.250026 Hz  
 AQ 1.9998451 sec  
 RG 3.6  
 DW 62.400 usec  
 DE 6.00 usec  
 TE 298.2 K  
 D1 0.10000000 sec  
 MCKEY 0.00000000 sec  
 MCKEY 0.01500000 sec

===== CHANNEL f1 =====  
 NUCL 1H  
 P1 7.50 usec  
 PL1 1.80 dB  
 SFO1 500.2235015 MHz

F2 - Processing parameters  
 SI 65536  
 SF 500.2200268 MHz  
 MW EM  
 SSB 0  
 LB 0.30 Hz  
 GB 0  
 PC 4.00

1D NMR plot parameters  
 CX 22.80 cm  
 CY 15.00 cm  
 FIP 10.000 ppm  
 FI 5002.20 Hz  
 FIP -1.000 ppm  
 F2 -500.22 Hz  
 FREQZ 0.45246 ppm/cm  
 HZCM 241.23423 Hz/cm

Z-restored spin-echo 13C spectrum with 1H decoupling

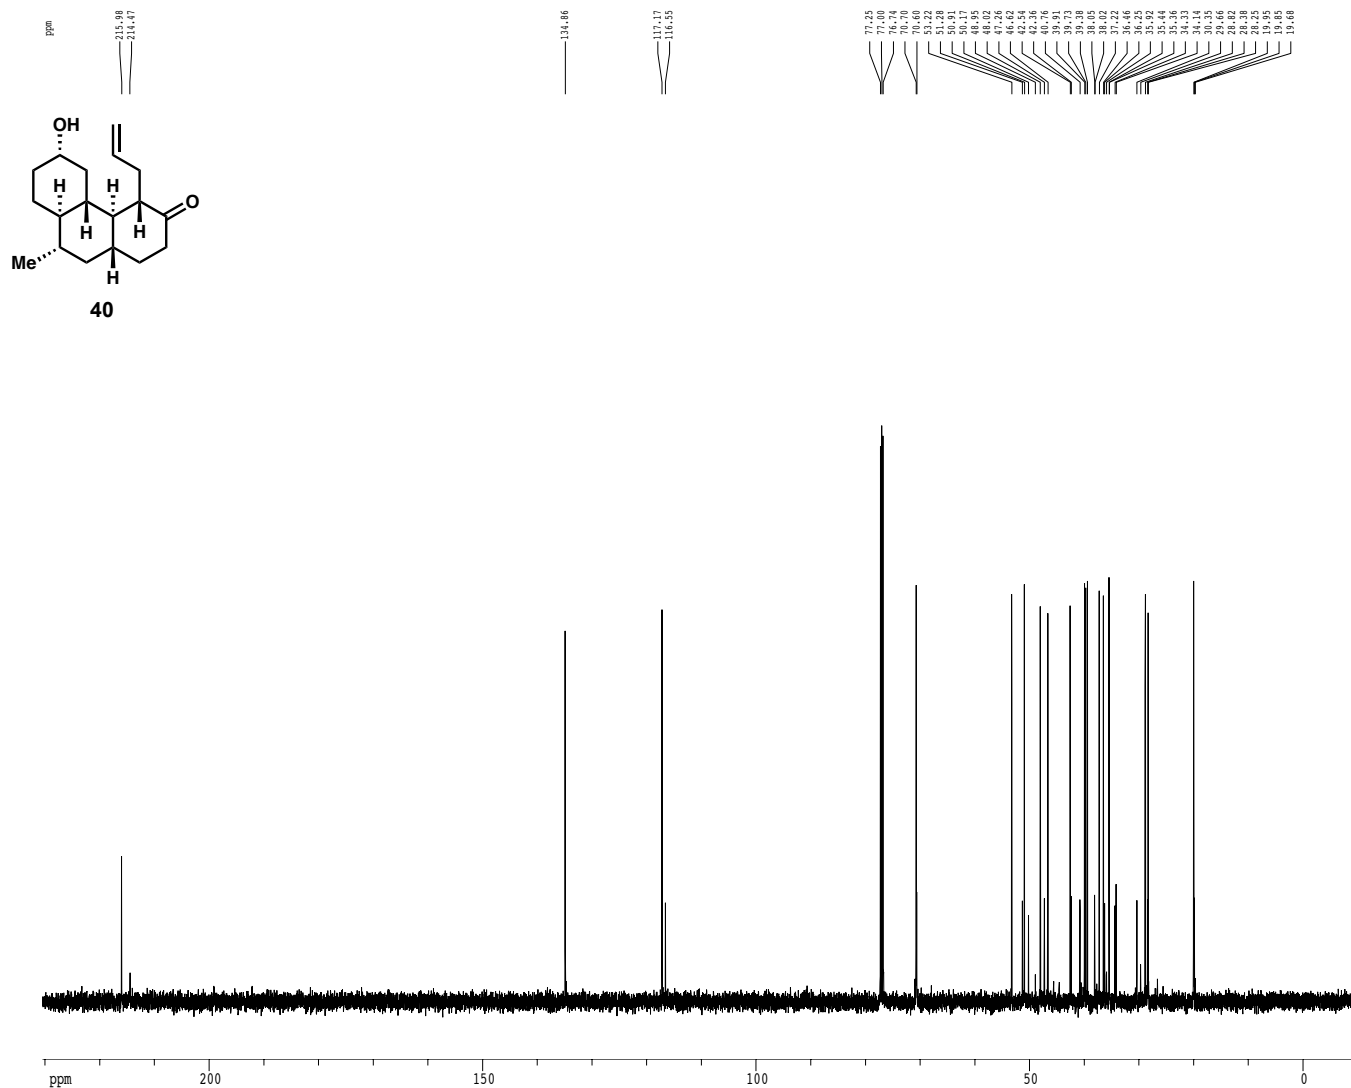



1H spectrum

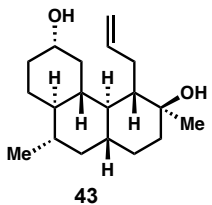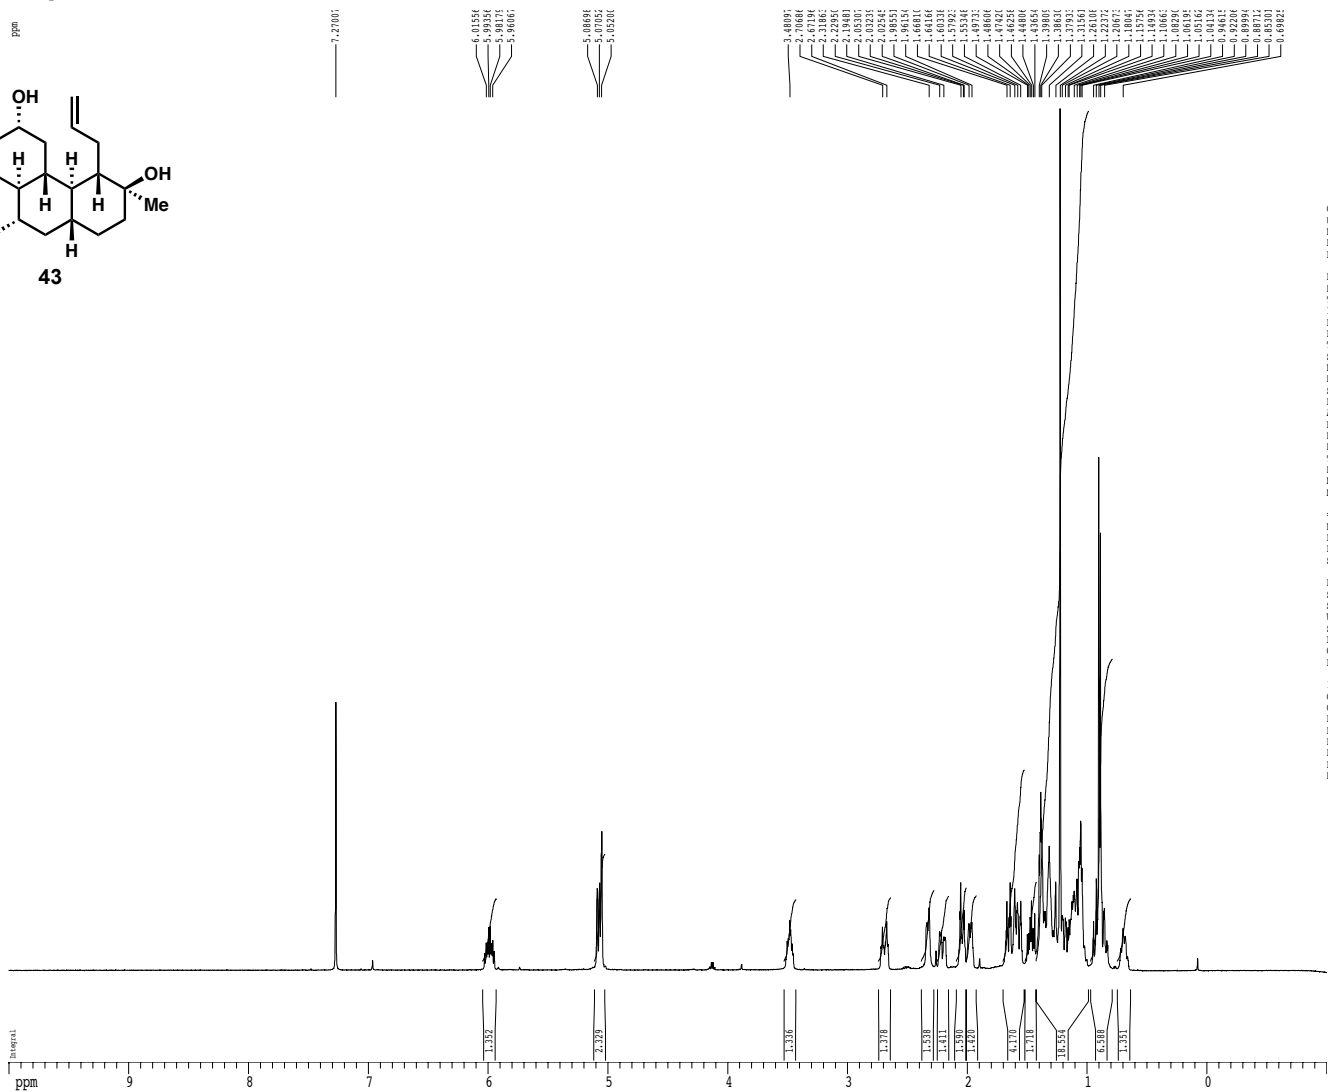

Current Data Parameters  
 USER roosen  
 NAME pcr4.086\_major  
 EXPNO 1  
 PROCNO 1

F2 - Acquisition Parameters  
 Date\_ 20150328  
 Time 15.50  
 INSTRUM cryo500  
 PROBRD 5 mm CPYC1 1H-  
 PULPROG zg30  
 TD 32048  
 SOLVENT CDCl3  
 NS 8  
 DS 2  
 SWH 8012.820 Hz  
 FIDRES 0.250026 Hz  
 AQ 1.9998451 sec  
 RG 4.5  
 DW 62.400 usec  
 DE 6.00 usec  
 TE 298.0 K  
 D1 0.1000000 sec  
 MCHRES 0.0000000 sec  
 MCHW 0.0150000 sec

----- CHANNEL f1 -----  
 NUCl 1H  
 P1 7.50 usec  
 PL1 1.60 dB  
 SFO1 500.2233015 MHz

F2 - Processing parameters  
 SI 65536  
 SF 500.220265 MHz  
 WDW EM  
 SSB 0  
 LB 0.30 Hz  
 GB 0  
 PC 4.00

1D NMR plot parameters  
 CX 22.80 cm  
 CT 15.00 cm  
 FIP 10.000 ppm  
 F1 5002.20 Hz  
 FFP -1.000 ppm  
 FQ -500.22 Hz  
 PPMH 0.48246 ppm/cm  
 HZMH 241.33423 Hz/cm

Z-restored spin-echo 13C spectrum with 1H decoupling

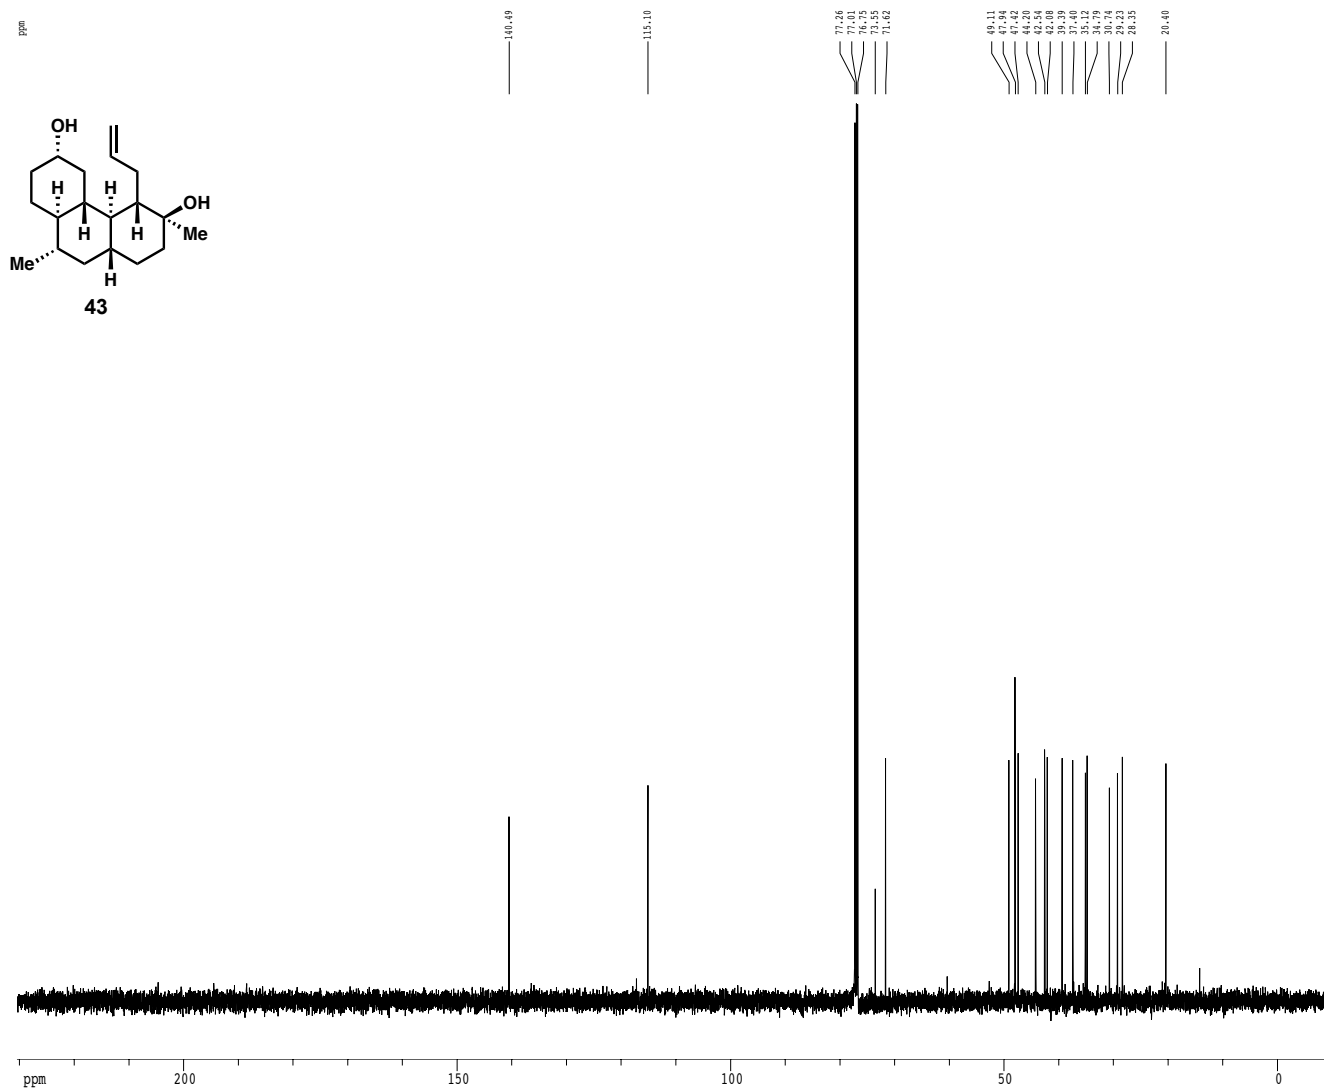

```

Current Data Parameters
USER          roosen
NAME         pcr4.086_major
EXPNO        2
PROCNO       1

F2 - Acquisition Parameters
Date_         20150227
Time_        11.38
INSTRUM      cryo500
PROBHD       5 mm CPCLP 1H-
PULPROG      SpinEcho30pp.prd
TD           65536
SOLVENT      CDCl3
NS           176
DS           2
SWE          30303.031 Hz
FIDRES       0.462388 Hz
AQ           1.0813940 sec
RG           650
DW           16.500 usec
DE           6.00 usec
TE           298.2 K
D1           0.50000000 sec
d11          0.03000000 sec
D16          0.00020000 sec
d17          0.00019600 sec
MCREST       0.00000000 sec
MCMXR       0.01500000 sec
P2           33.10 usec

===== CHANNEL f1 =====
NUC1         13C
P1           16.55 usec
P11          500.00 usec
P12          2000.00 usec
PL0          120.00 dB
PL1          -1.00 dB
SFO1         125.7942548 MHz
SP1          2.70 dB
SP2          2.70 dB
SFO2         Crp60,0.5,20.1
SFO3         Crp60comp.4
SFOFF1       0.00 Hz
SFOFF2       0.00 Hz

===== CHANNEL f2 =====
CPDPRG2      walz16
NUC2         1H
PCPD2        100.00 usec
PL2          1.60 dB
PL12         24.50 dB
SFO2         500.2225011 MHz

===== GRADIENT CHANNEL =====
GPRAM1       SINE.100
GPRAM2       SINE.100
GFX1         0.00 k
GFX2         0.00 k
GPF1         0.00 k
GPF2         0.00 k
GPF3         30.00 k
GPF4         50.00 k
p15          500.00 usec
p16          1000.00 usec

F2 - Processing parameters
SI           65536
SF           125.7804277 MHz
WDW          EM
SSB          0
LB           1.00 Hz
GB           0
PC           2.00

1D NMR plot parameters
CX           22.80 cm
CY           15.65 cm
F1P         230.637 ppm
F1          29009.68 Hz
F2P         -10.287 ppm
F2          -1293.96 Hz
FPMCM       10.56688 ppm/cm
H1CH        1329.10718 Hz/cm
    
```

1H spectrum

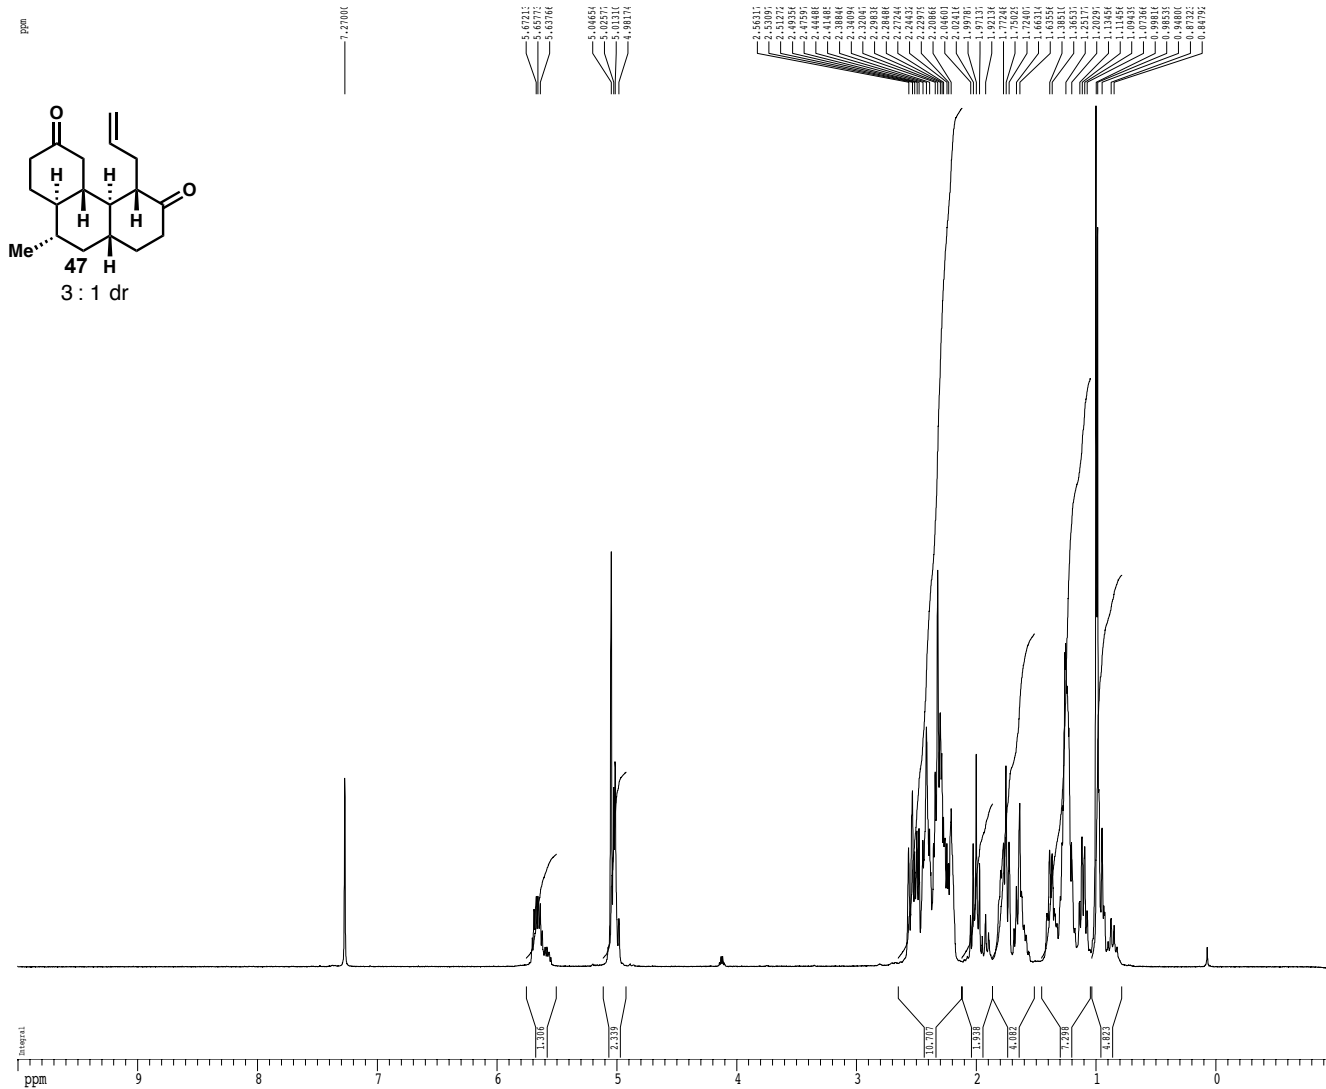

2.56211  
2.56211  
2.56211  
2.56211  
2.49354  
2.49354  
2.49354  
2.49354  
2.41882  
2.41882  
2.38844  
2.38844  
2.34091  
2.34091  
2.28484  
2.28484  
2.27241  
2.27241  
2.22975  
2.22975  
2.20861  
2.20861  
2.20240  
2.20240  
1.99785  
1.99785  
1.91137  
1.91137  
1.72047  
1.72047  
1.72047  
1.72047  
1.65354  
1.65354  
1.38511  
1.38511  
1.35537  
1.35537  
1.20295  
1.20295  
1.13164  
1.13164  
1.08433  
1.08433  
0.99811  
0.99811  
0.94800  
0.94800  
0.87322  
0.87322

Current Data Parameters  
 USER roosen  
 NAME pcr4.048\_isolate  
 EXPNO 1  
 PROCNO 1

F2 - Acquisition Parameters  
 Date\_ 20150128  
 Time 20.04  
 INSTRUM cryo500  
 PROBRD 5 mm CPYC1 1H-  
 PULPROG zg30  
 TD 32048  
 SOLVENT CDCl3  
 NS 8  
 DS 2  
 SWH 8012.820 Hz  
 FIDRES 0.250026 Hz  
 AQ 1.9998451 sec  
 RG 5  
 DW 62.400 usec  
 DE 6.00 usec  
 TE 298.0 K  
 DI 0.10000000 sec  
 MCHRES 0.00000000 sec  
 MCHRX 0.01500000 sec

----- CHANNEL f1 -----  
 NUC1 1H  
 P1 7.50 usec  
 PL1 1.60 dB  
 SFO1 500.2233015 MHz

F2 - Processing parameters  
 SI 65536  
 SF 500.220268 MHz  
 WDW EM  
 SSB 0  
 LB 0.30 Hz  
 GB 0  
 PC 4.00

1D NMR plot parameters  
 CX 22.80 cm  
 CF 15.00 cm  
 FIP 10.000 ppm  
 F1 5002.20 Hz  
 FFP -1.000 ppm  
 F2 -500.22 Hz  
 FWHM 0.48246 ppm/cm  
 HZCM 241.33423 Hz/cm

Z-restored spin-echo 13C spectrum with 1H decoupling

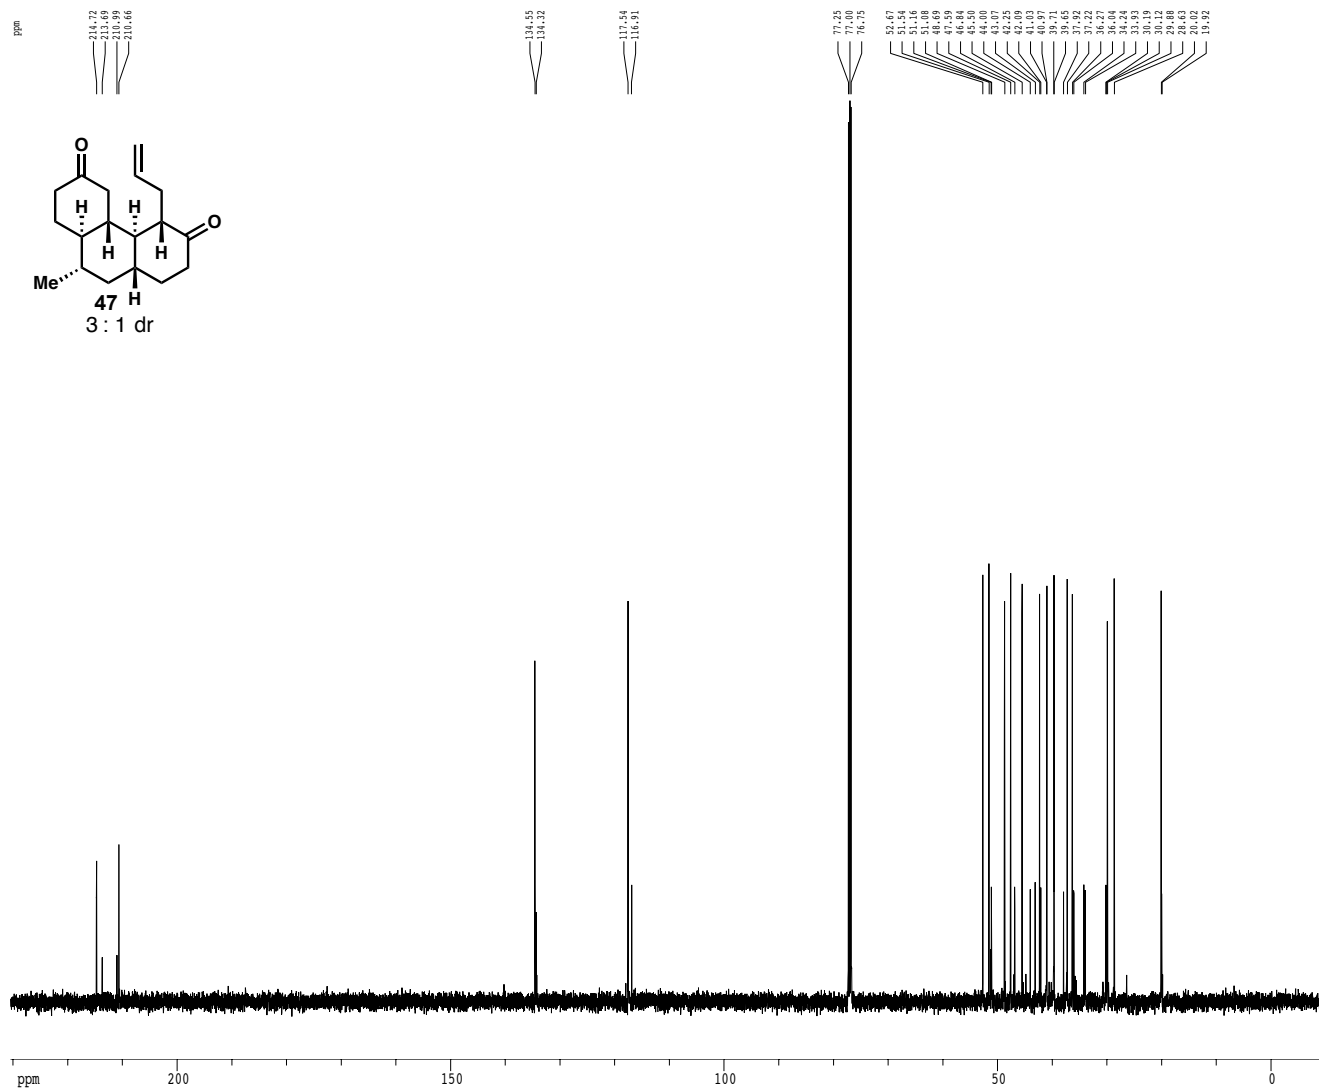

```

Current Data Parameters
USER          roosen
NAME         pcr4.048_isolate
EXPNO        2
PROCNO       1

F2 - Acquisition Parameters
Date_        20150129
Time         20.10
INSTRUM      cryo500
PROBHD       5 mm CPCL 1H-
PULPROG      SpinEcho30pp.prd
TD           65536
SOLVENT      CDCl3
NS           248
DS           2
SWEZ         30303.031 Hz
FIDRES       0.462388 Hz
AQ           1.0813940 sec
RG           3449.1
DW           16.500 usec
DE           6.00 usec
TE           298.2 K
D1           0.50000000 sec
d11          0.03000000 sec
D16          0.00000000 sec
d17          0.00019600 sec
MCREST       0.00000000 sec
MCMXR       0.01500000 sec
P2           33.10 usec

===== CHANNEL f1 =====
NUC1         13C
P1           16.55 usec
P11          500.00 usec
P12          2000.00 usec
PL0          120.00 dB
PL1          -1.00 dB
SFO1         125.7942048 MHz
SP1          2.70 dB
SP2          2.70 dB
SFOFF1       0.00 Hz
SFOFF2       0.00 Hz

===== CHANNEL f2 =====
CPDPRG2      walz16
NUC2         1H
PCPD2        100.00 usec
PL2          1.60 dB
PL12         24.50 dB
SFO2         500.2225011 MHz

===== GRADIENT CHANNEL =====
GPRAM1       SINE.100
GPRAM2       SINE.100
GX1          0.00 %
GPX2         0.00 %
GPT1         0.00 %
GPT2         0.00 %
GPE1         30.00 %
GPE2         50.00 %
p15          500.00 usec
p16          1000.00 usec

F2 - Processing parameters
SI           65536
SF           125.7804300 MHz
MVM          80
SSB          0
LB           1.00 Hz
GB           0
PC           2.00

1D NMR plot parameters
CX           22.80 cm
CY           15.65 cm
F1P          230.373 ppm
F1           28976.36 Hz
F2P          -10.547 ppm
F2           -1326.67 Hz
FPMCM        10.56667 ppm/cm
H1CH         1329.08032 Hz/cm
    
```

1H spectrum

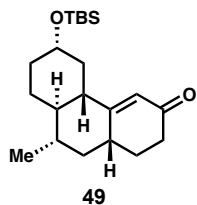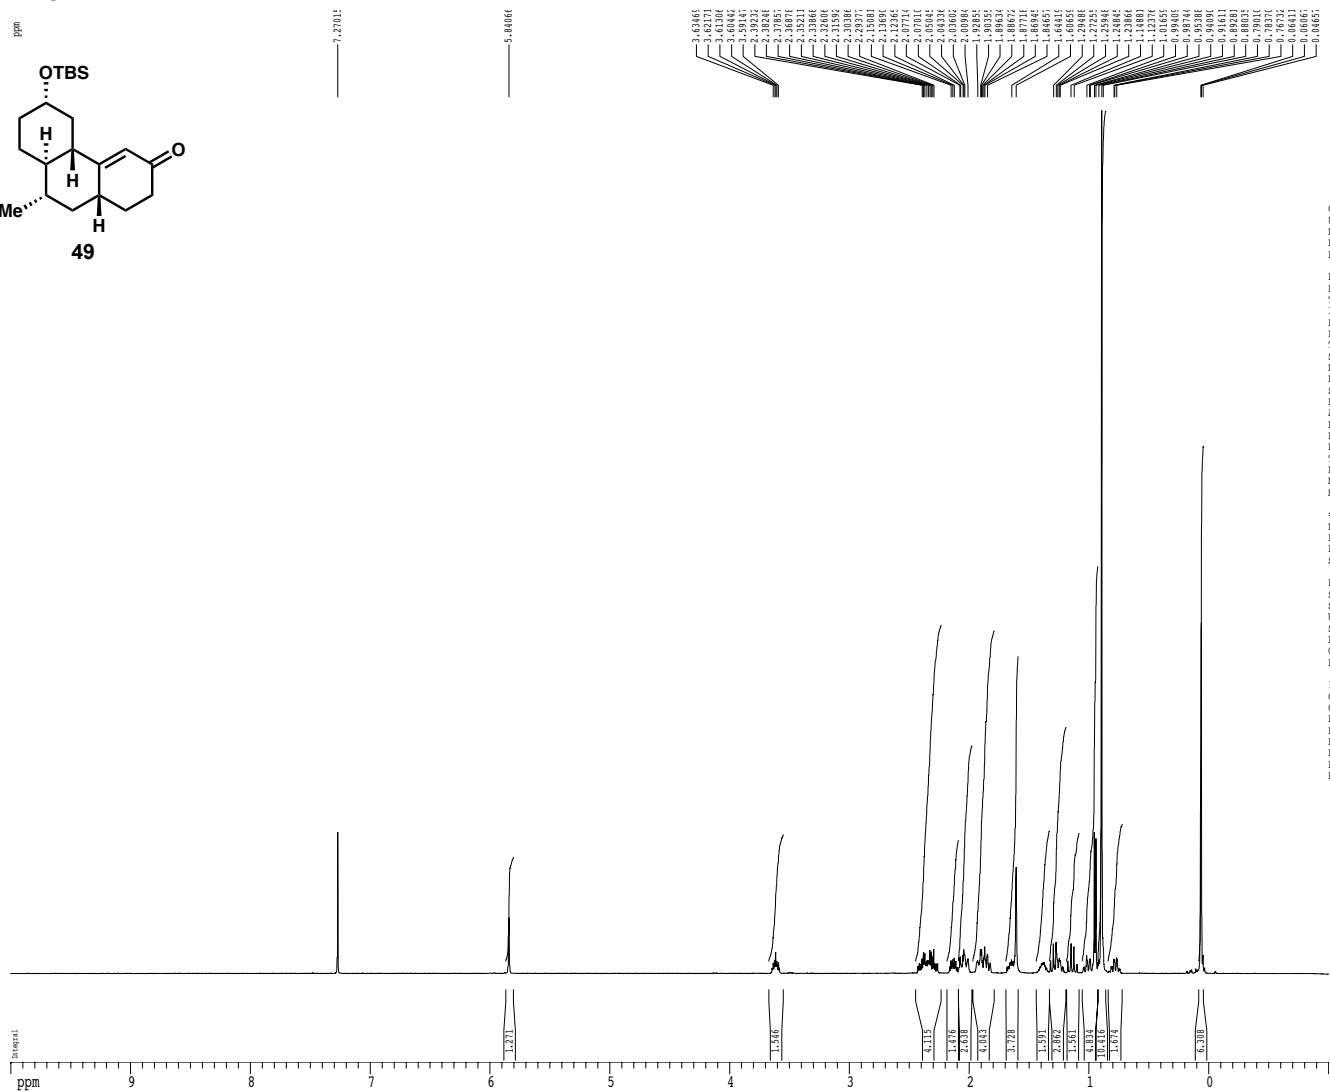

```

Current Data Parameters
USER roosen
NAME pcr4.269_isolate
EXNO 1
PROCNO 1

F2 - Acquisition Parameters
Date 20150923
Time 10.04
INSTRUM cryo500
PROBHD 5 mm CPYCI 1H-
PULPROG zg30
TD 32048
SOLVENT CDCl3
NS 8
DS 2
SWH 8012.820 Hz
FIDRES 0.250026 Hz
AQ 1.9998451 sec
RG 6.3
DN 62.400 usec
DE 6.00 usec
TE 298.0 K
D1 0.10000000 sec
MCHYST 0.00000000 sec
MCHRX 0.01500000 sec

----- CHANNEL f1 -----
NUC1 1H
P1 7.50 usec
PE1 1.60 GB
SFO1 500.2233015 MHz

F2 - Processing parameters
SI 65536
SF 500.220266 MHz
WDW EM
SSB 0
LB 0.30 Hz
GB 0
PC 1.00

1D NMR plot parameters
CX 22.80 cm
CT 15.00 cm
FIP 10.000 ppm
F1 5002.20 Hz
FPP -1.000 ppm
FQ -500.22 Hz
PPHM 0.48246 ppm/cm
HSCM 241.33423 Hz/cm
    
```

Z-restored spin-echo 13C spectrum with 1H decoupling

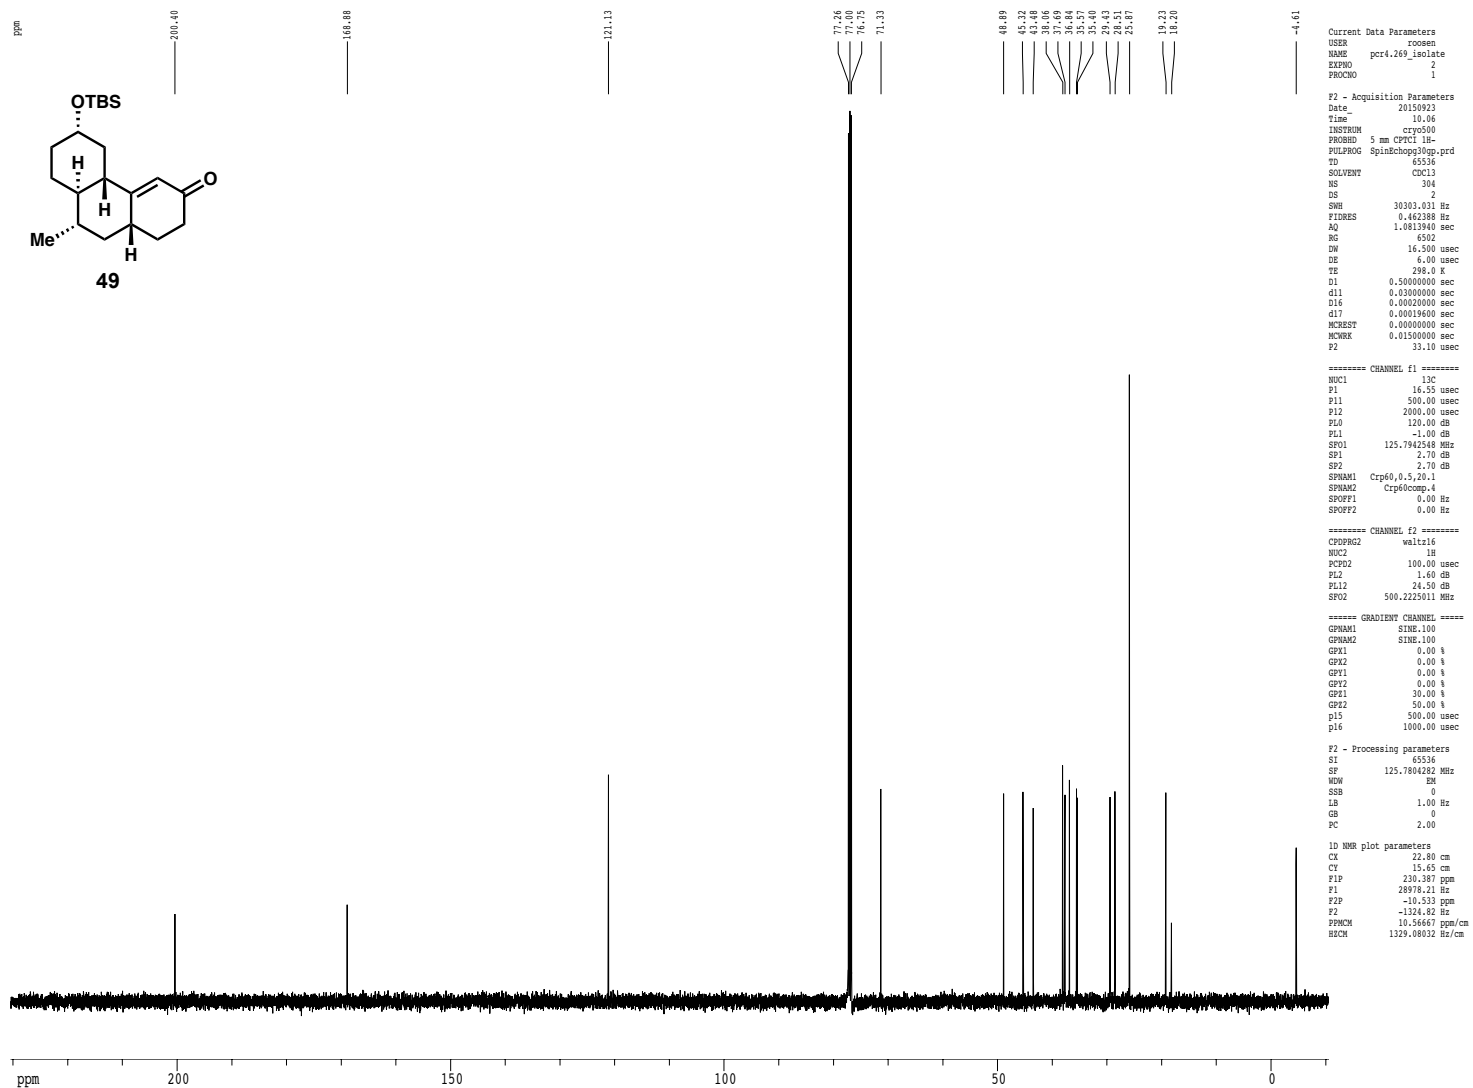

1H spectrum

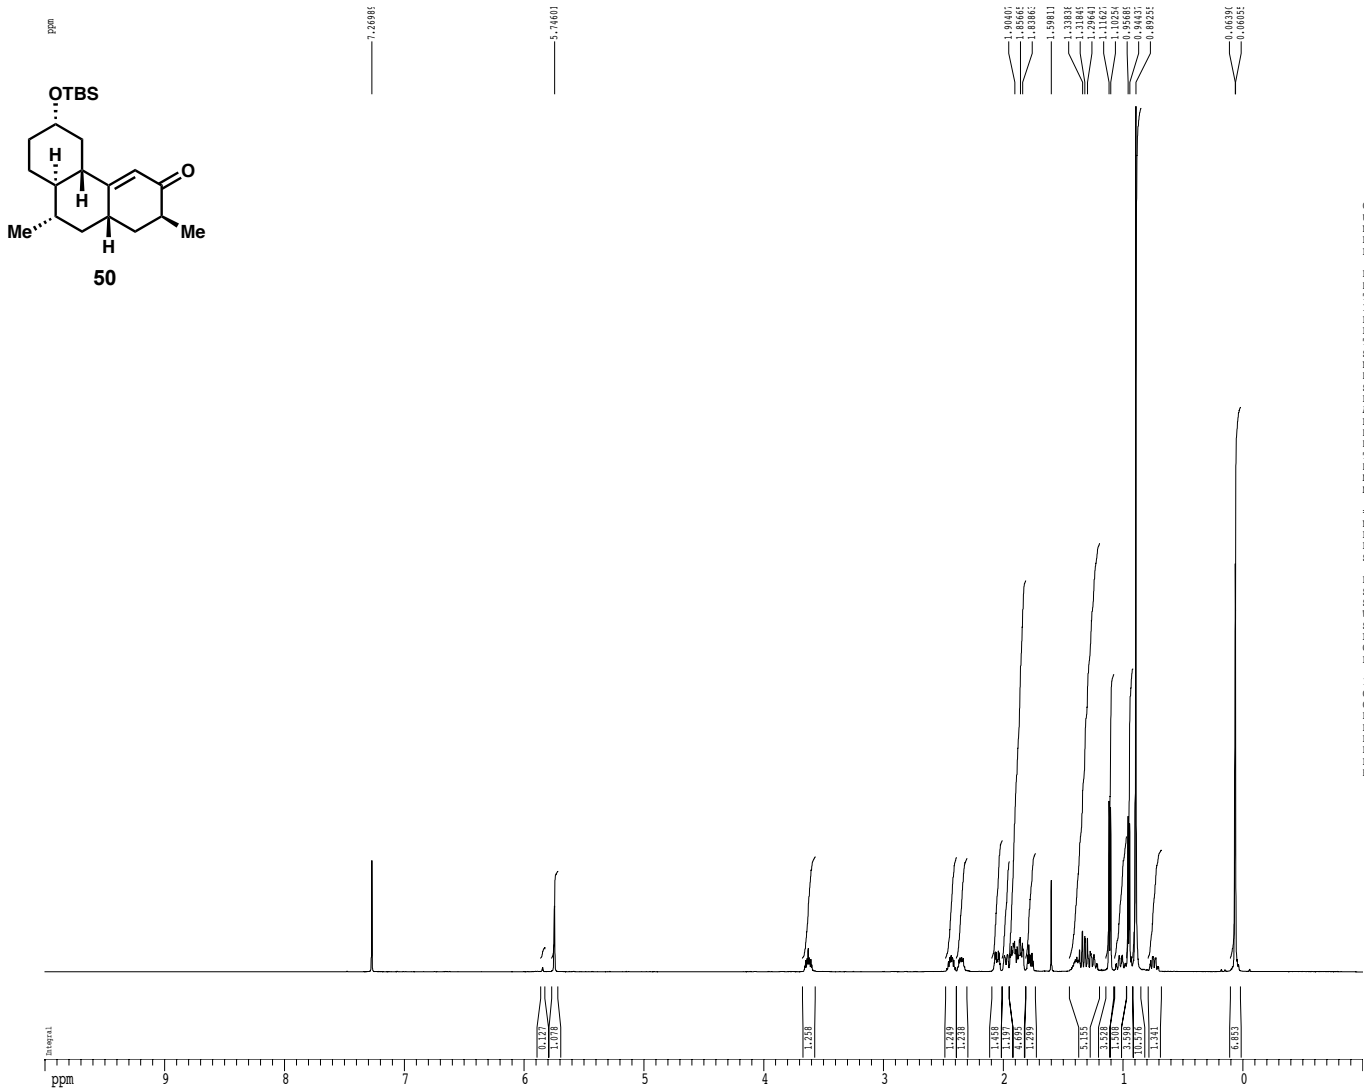

Current Data Parameters  
 USER roosen  
 NAME pcr4.289\_isolate  
 EXPNO 1  
 PROCNO 1

F2 - Acquisition Parameters  
 Date\_ 20151014  
 Time 11.15  
 INSTRUM cryo500  
 PROBRD 5 mm CPYC1 1H-  
 PULPROG zg30  
 TD 32048  
 SOLVENT CDCl3  
 NS 8  
 DS 2  
 SWH 8012.820 Hz  
 FIDRES 0.250026 Hz  
 AQ 1.9998451 sec  
 RG 10.1  
 DW 62.400 usec  
 DE 6.00 usec  
 TE 298.0 K  
 D1 0.10000000 sec  
 WCHST 0.00000000 sec  
 MCHRX 0.01500000 sec

----- CHANNEL f1 -----  
 NU01 1H  
 P1 7.50 usec  
 PL1 1.60 dB  
 SFO1 500.2233015 MHz

F2 - Processing parameters  
 SI 65536  
 SF 500.220265 MHz  
 WDW EM  
 SSB 0  
 LB 0.30 Hz  
 GB 0  
 PC 4.00

1D NMR plot parameters  
 CX 22.80 cm  
 CF 15.60 cm  
 FIP 10.000 ppm  
 F1 5002.20 Hz  
 FFP -1.000 ppm  
 FQ -500.22 Hz  
 PPMCM 0.48246 ppm/cm  
 HZCM 241.33423 Hz/cm

Z-restored spin-echo 13C spectrum with 1H decoupling

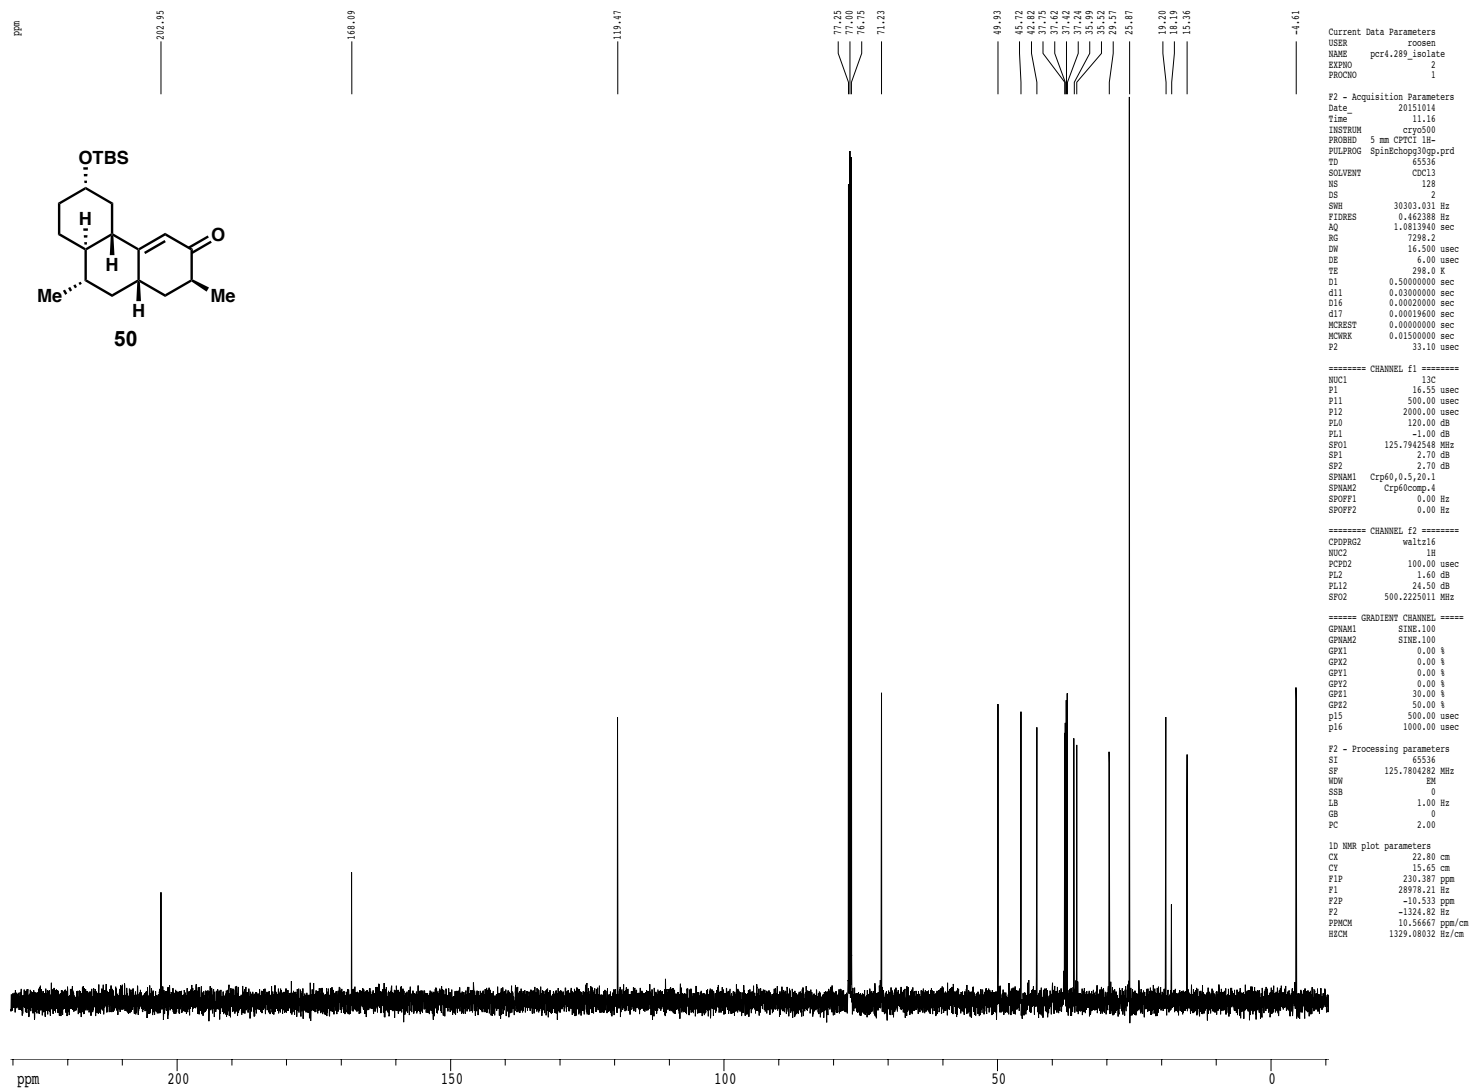



1H spectrum

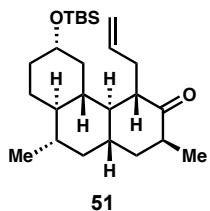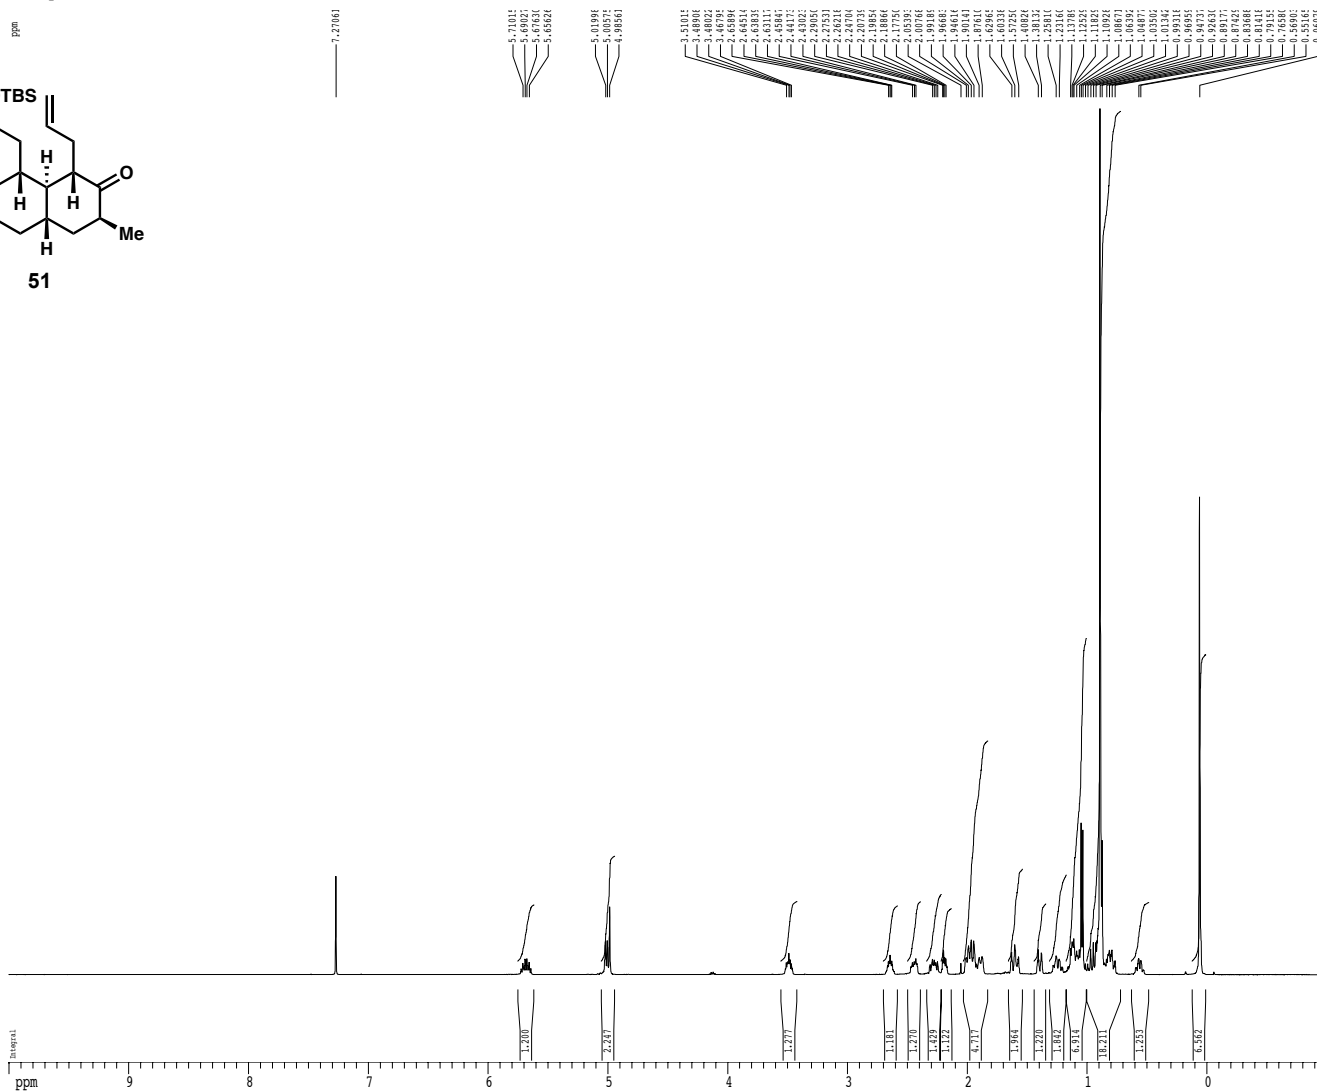

Current Data Parameters  
 USER roosen  
 NAME pcr4.296\_f5-9  
 EXPNO 1  
 PROCNO 1

F2 - Acquisition Parameters  
 Date\_ 20151020  
 Time 9.45  
 INSTRUM cryo500  
 PROBDW 5 mm CPYC1 1H-  
 PULPROG zg30  
 TD 32048  
 SOLVENT CDCl3  
 NS 8  
 DS 2  
 SWH 8012.820 Hz  
 FIDRES 0.250026 Hz  
 AQ 1.9998451 sec  
 RG 10.1  
 DW 62.400 usec  
 DE 6.00 usec  
 TE 298.0 K  
 D1 0.10000000 sec  
 MCHRES 0.00000000 sec  
 MCHW 0.01500000 sec

----- CHANNEL f1 -----  
 NU01 1H  
 P1 7.50 usec  
 PL1 1.60 dB  
 SP01 500.2233015 MHz

F2 - Processing parameters  
 SI 65536  
 SF 500.220260 MHz  
 WDW EM  
 SSB 0  
 LB 0.30 Hz  
 GB 0  
 PC 2.00

1D NMR plot parameters  
 CX 22.80 cm  
 CT 15.00 cm  
 FIP 10.000 ppm  
 F1 5002.20 Hz  
 FFP -1.000 ppm  
 F2 -500.22 Hz  
 PPMCM 0.48246 ppm/cm  
 HZCM 241.33423 Hz/cm

Z-restored spin-echo 13C spectrum with 1H decoupling

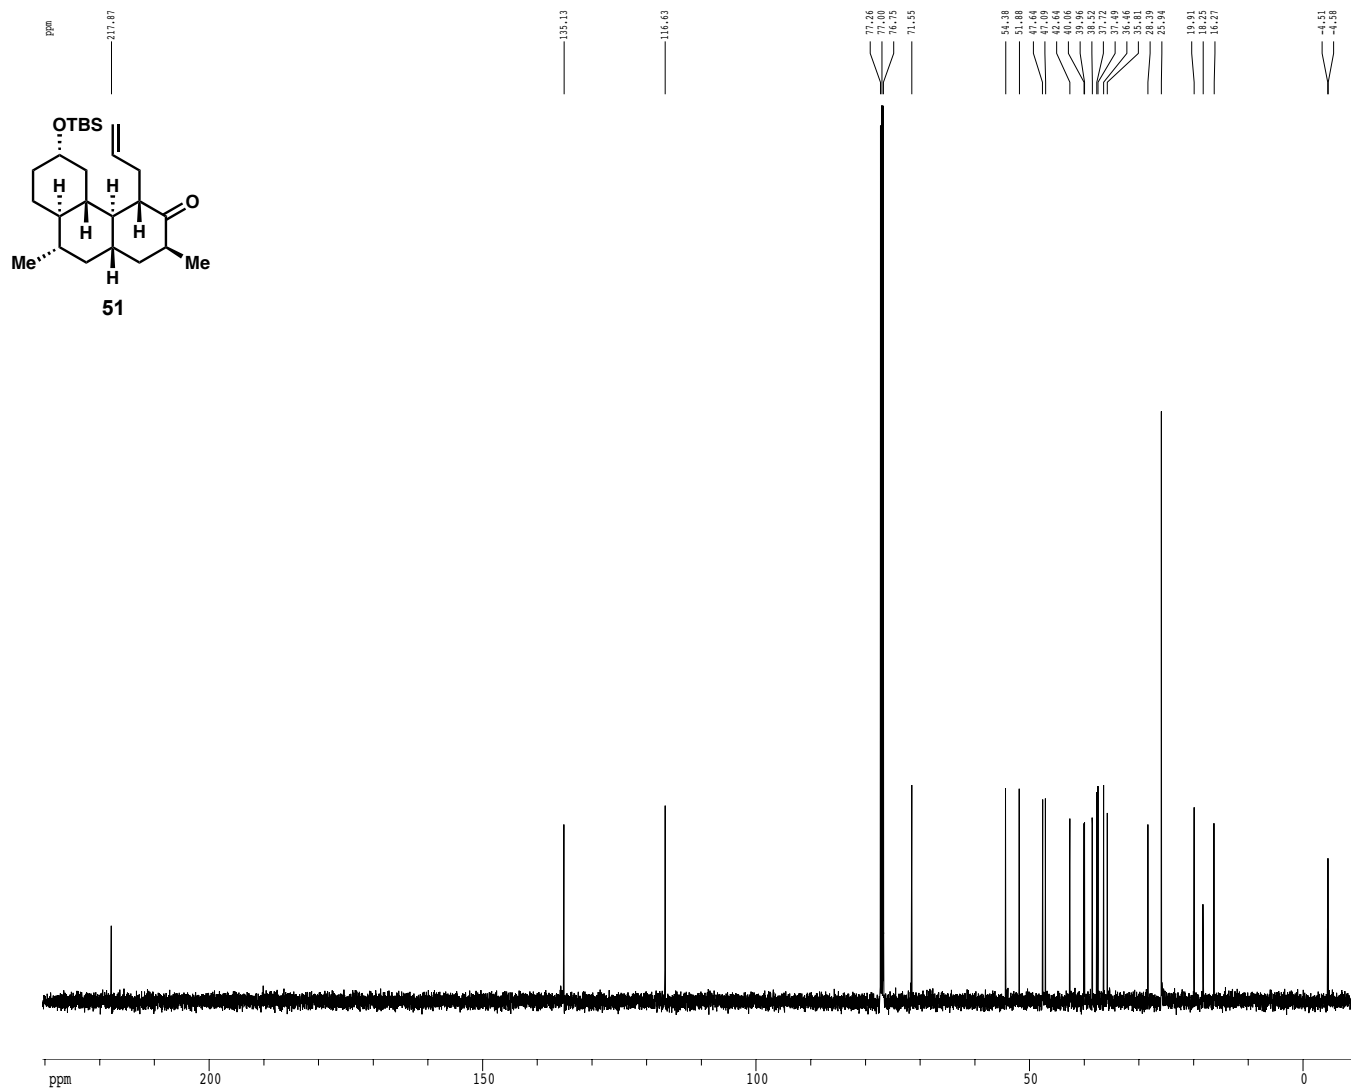

1H spectrum

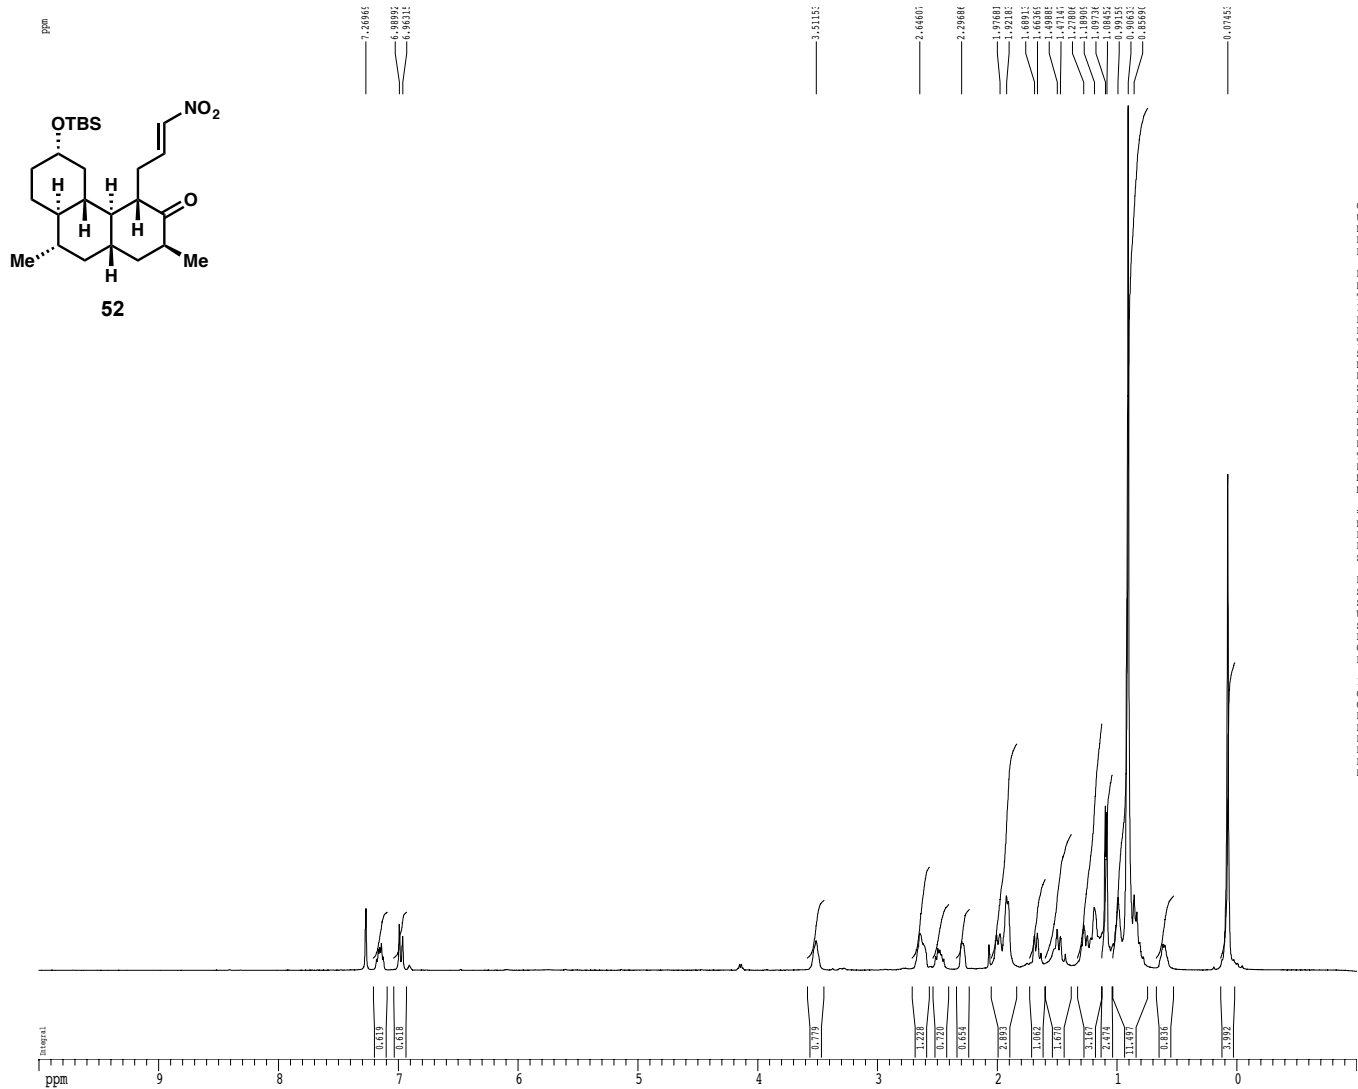

```

Current Data Parameters
USER      roosen
NAME      pcr5.011_f5-8
EXPNO     1
PROCNO    1

F2 - Acquisition Parameters
Date_     20151025
Time      20.33
INSTRUM   cryo500
PROBHD    5 mm CPYCI 1H-
PULPROG   zg30
TD         32048
SOLVENT   CDCl3
NS         8
DS         2
SWH        8012.820 Hz
FIDRES     0.250026 Hz
AQ         1.9998451 sec
RG         5.7
DW         62.400 usec
DE         6.00 usec
TE         298.0 K
D1         0.10000000 sec
MCHREST    0.00000000 sec
MCHRX      0.01500000 sec

----- CHANNEL f1 -----
NUC1       1H
P1         7.50 usec
PL1        1.60 dB
SFO1       500.2233015 MHz

F2 - Processing parameters
SI         65536
SF         500.220266 MHz
WDW        EM
SSB        0
LB         0.30 Hz
GB         0
PC         4.00

1D NMR plot parameters
CX         22.80 cm
CT         15.00 cm
FIP        10.000 ppm
F1         5002.20 Hz
F2         -1.000 ppm
F3         -500.22 Hz
PPHM       0.48246 ppm/cm
HZCM       241.33423 Hz/cm
    
```

Z-restored spin-echo 13C spectrum with 1H decoupling

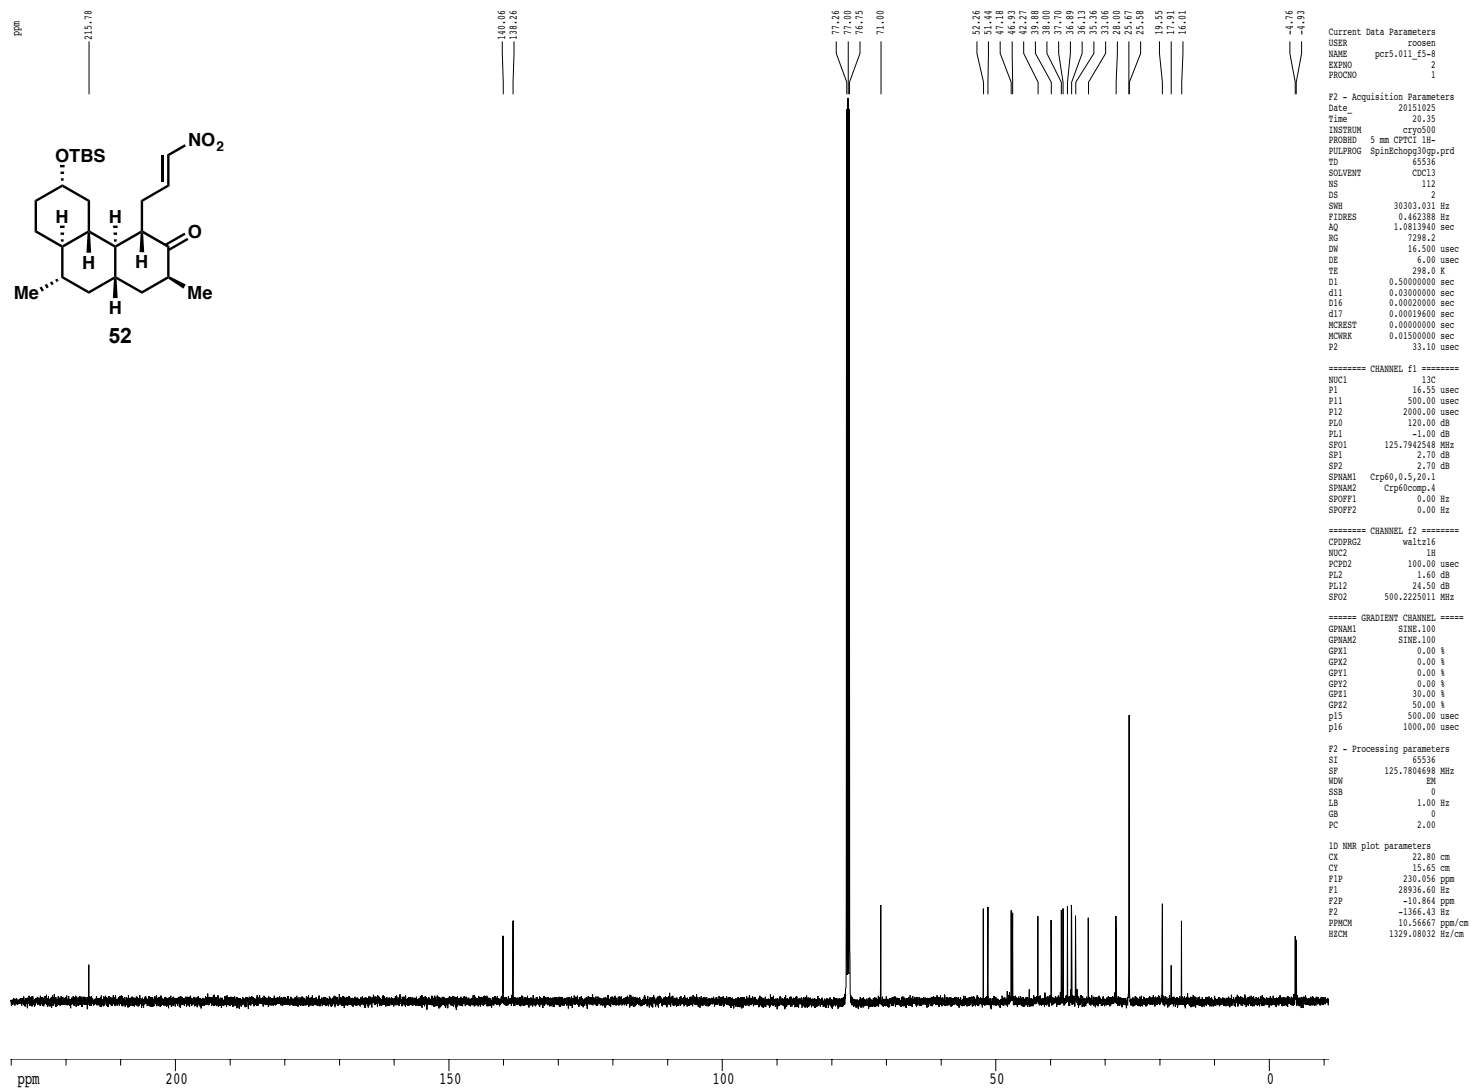

1H spectrum

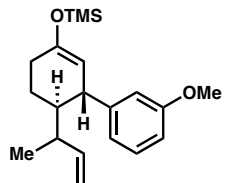

57

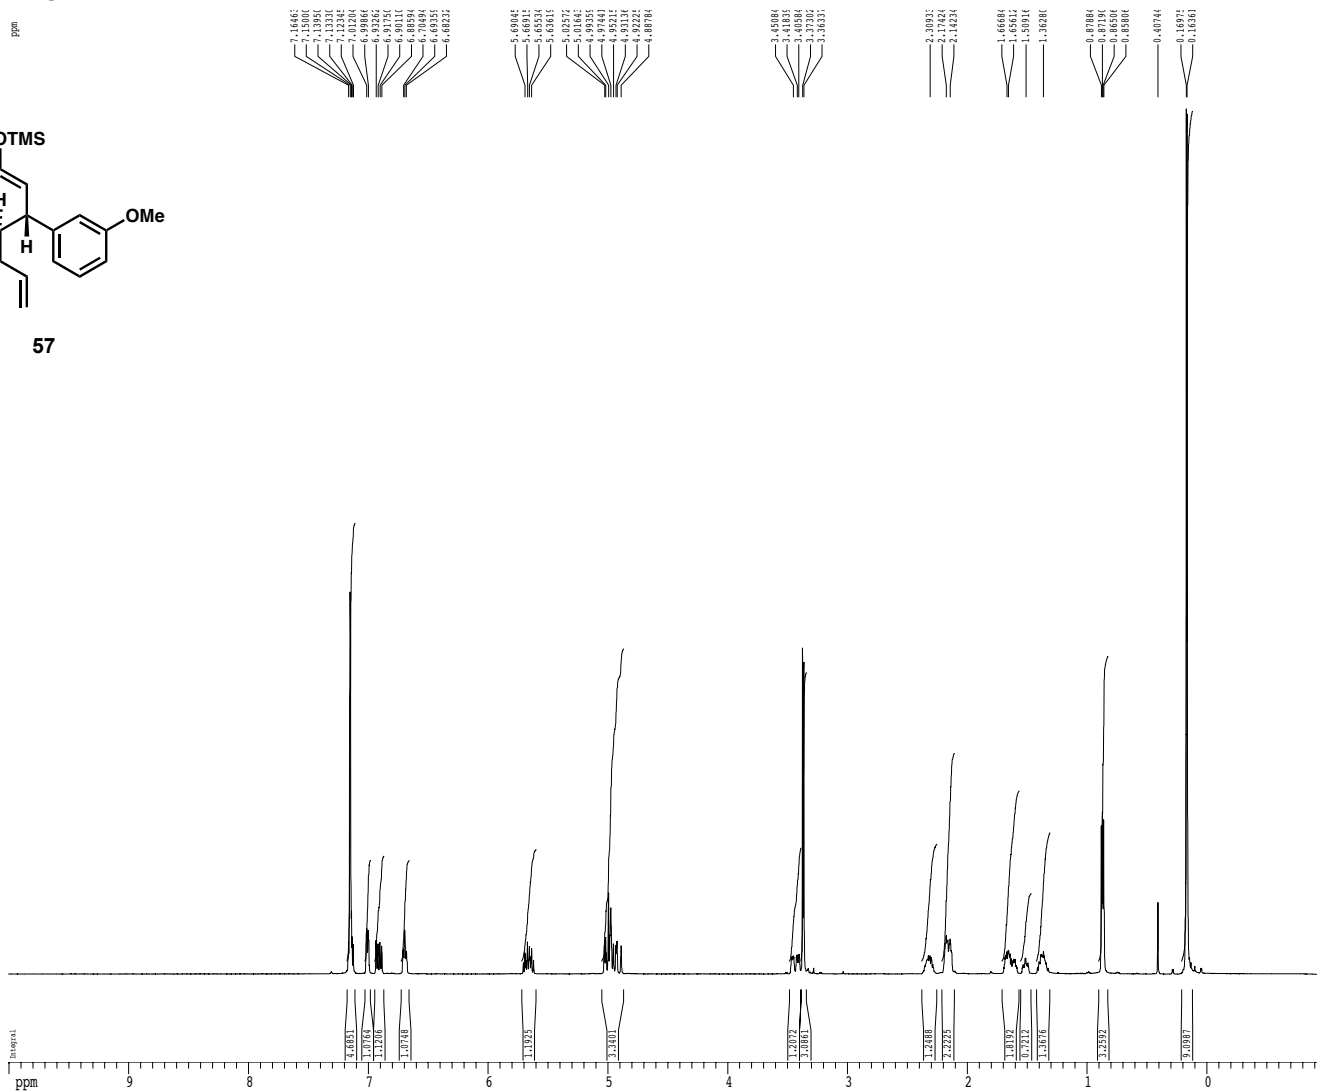

```

Current Data Parameters
NAME      roosen
EXPNO    pcr4.205_isolate_c6h6
PROCNO   1

F2 - Acquisition Parameters
Date_    20150707
Time     12.13
INSTRUM  cryo500
PROBHD   5 mm CPYCI 1H-
PULPROG  zg30
TD        32048
SOLVENT  c506
NS        8
DS        2
SWH       8012.820 Hz
FIDRES    0.250026 Hz
AQ        1.9998451 sec
RG         3.7
DM        62.400 usec
DE        6.00 usec
TE        298.0 K
D1        0.10000000 sec
MCHST     0.00000000 sec
MCHX      0.01500000 sec

***** CHANNEL f1 *****
NUC1      1H
P1        7.50 usec
PL1       1.40 dB
SFO1      500.225015 MHz

F2 - Processing parameters
SI         65536
SF         500.220054 MHz
WDW        EM
SSB        0
LB         0.30 Hz
GB         0
PC         4.00

1D NMR plot parameters
CT         22.80 cm
CY         15.00 cm
FIP        10.000 ppm
FI         5002.20 Hz
FZP        -1.000 ppm
F2         -500.22 Hz
F2NMR      0.46246 ppm/cm
HSCM       241.33421 Hz/cm
    
```

Z-restored spin-echo 13C spectrum with 1H decoupling

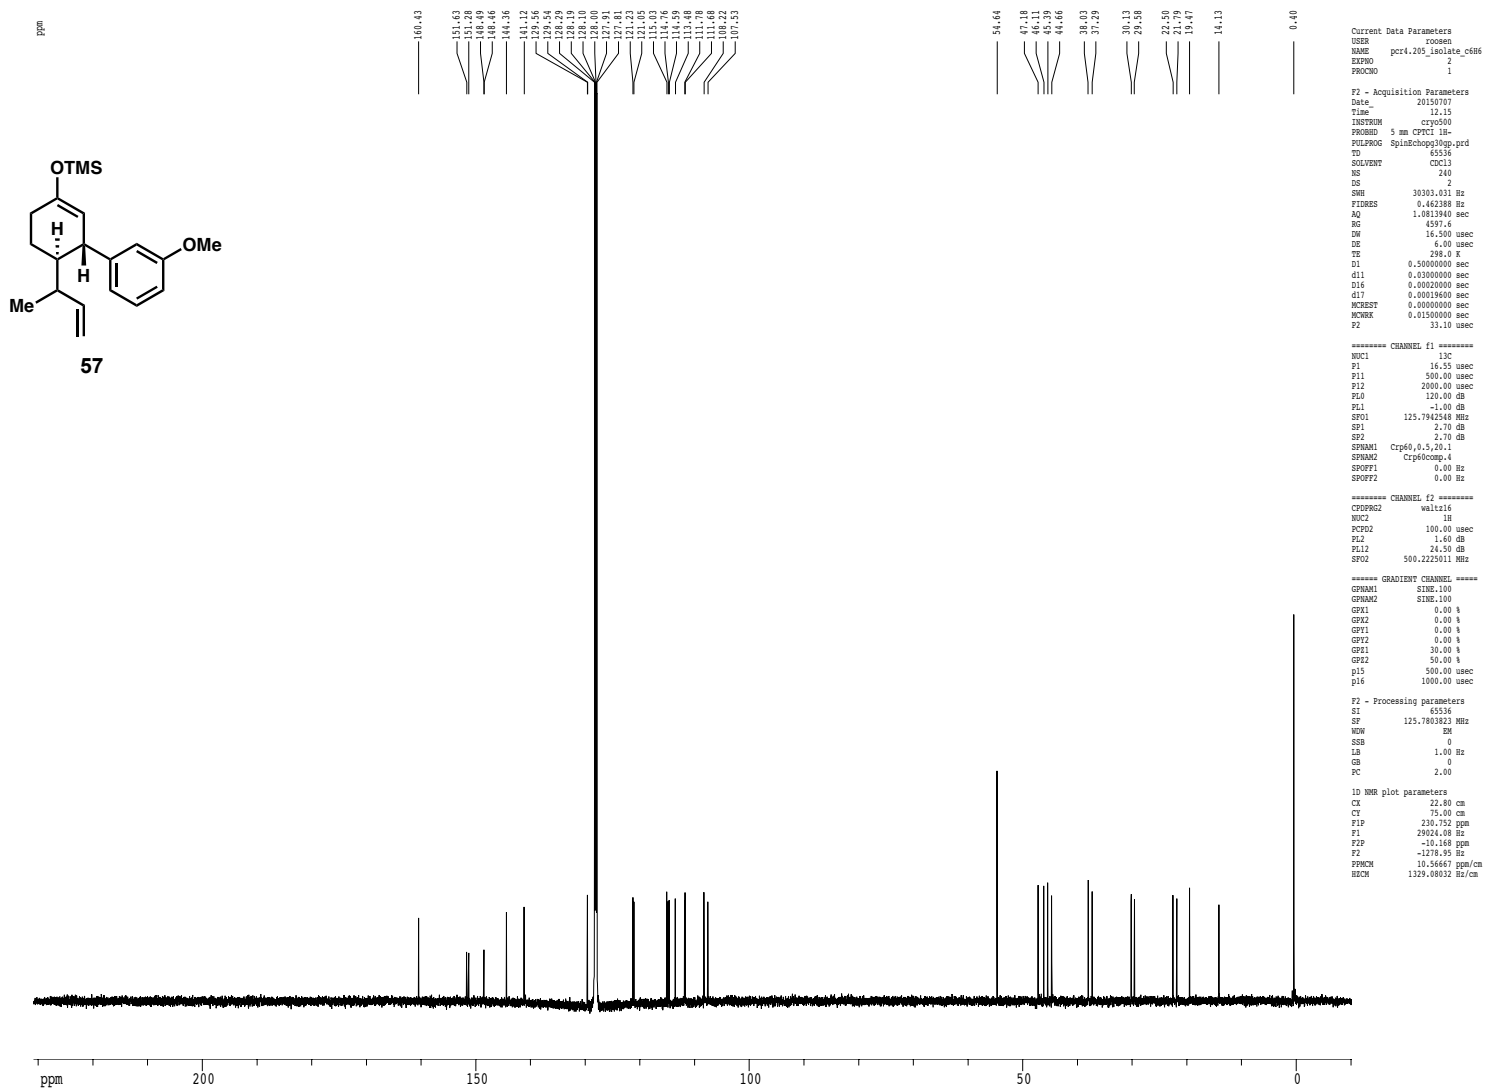

1H spectrum

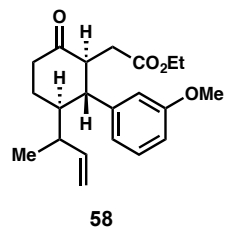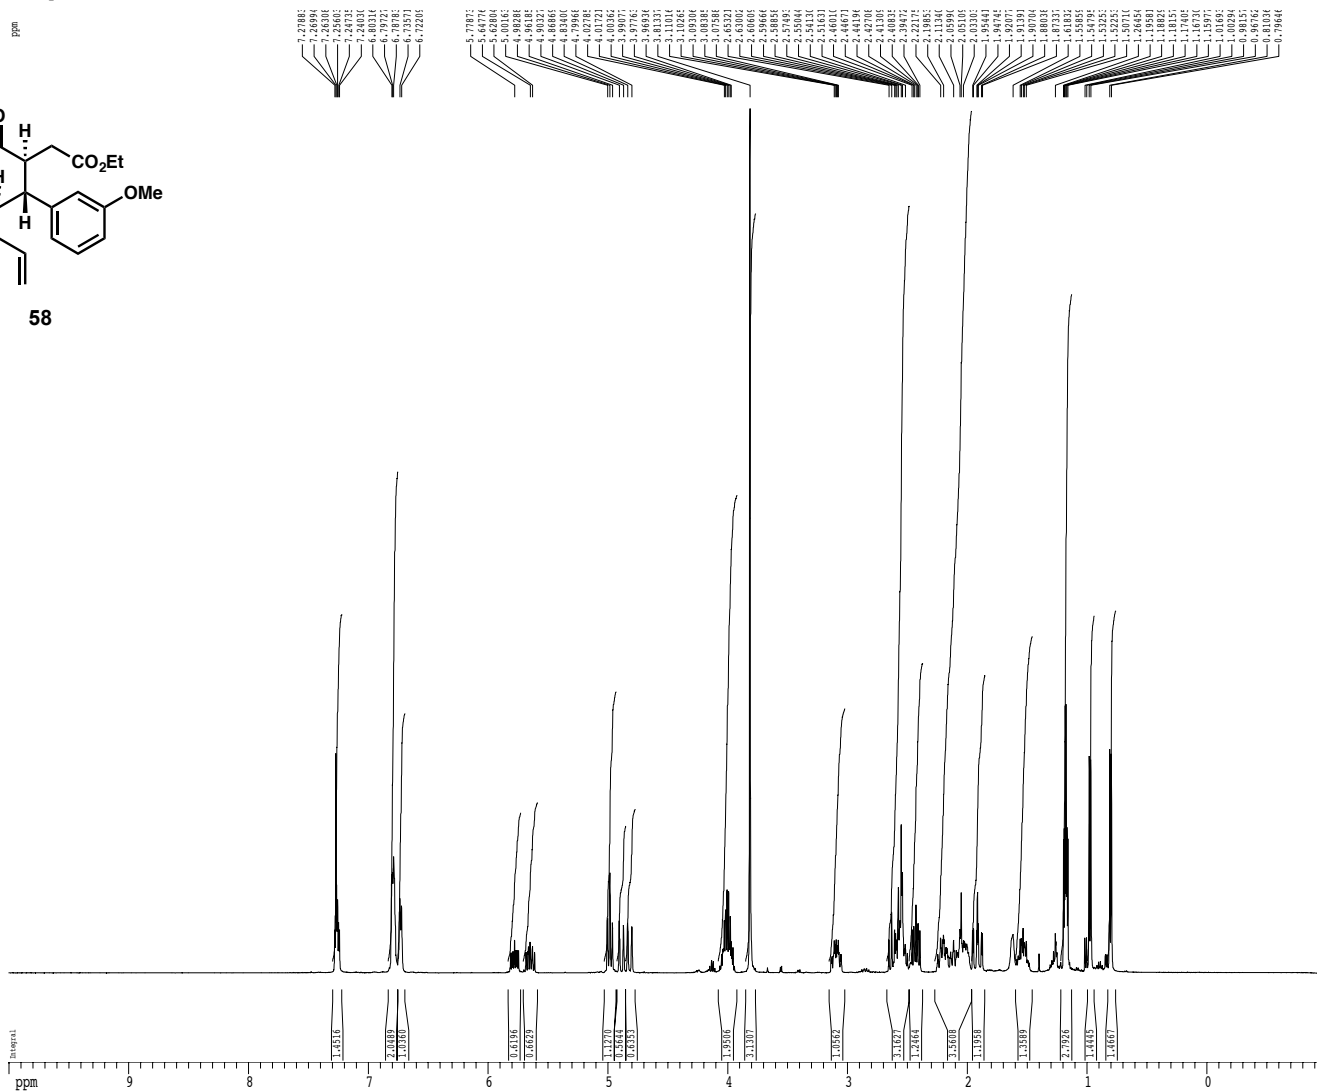

Current Data Parameters  
 USER roosen  
 NAME pcr4.188\_isolate  
 EXPNO 2  
 PROCNO 1

F2 - Acquisition Parameters  
 Date\_ 20150703  
 Time 12.43  
 INSTRUM cryo500  
 PROBRD 5 mm CPYC1 1H-  
 PULPROG zg30  
 TD 32048  
 SOLVENT CDCl3  
 NS 8  
 DS 2  
 SWH 8012.820 Hz  
 FIDRES 0.250026 Hz  
 AQ 1.9998451 sec  
 RG 6.3  
 DW 62.400 usec  
 DE 6.00 usec  
 TE 298.0 K  
 D1 0.10000000 sec  
 MCHRES 0.00000000 sec  
 MCHW 0.01500000 sec

----- CHANNEL f1 -----  
 NU01 1H  
 P1 7.50 usec  
 PE1 1.60 dB  
 SP01 500.2233015 MHz

F2 - Processing parameters  
 SI 65536  
 SF 500.2200265 MHz  
 WDW EM  
 SSB 0  
 LB 0.30 Hz  
 GB 0  
 PC 4.00

1D NMR plot parameters  
 CX 22.80 cm  
 CT 15.00 cm  
 FIP 10.000 ppm  
 FI 5002.20 Hz  
 FFP -1.000 ppm  
 FQ -500.22 Hz  
 PPMH 0.48246 ppm/cm  
 HZCM 241.33423 Hz/cm

Z-restored spin-echo 13C spectrum with 1H decoupling

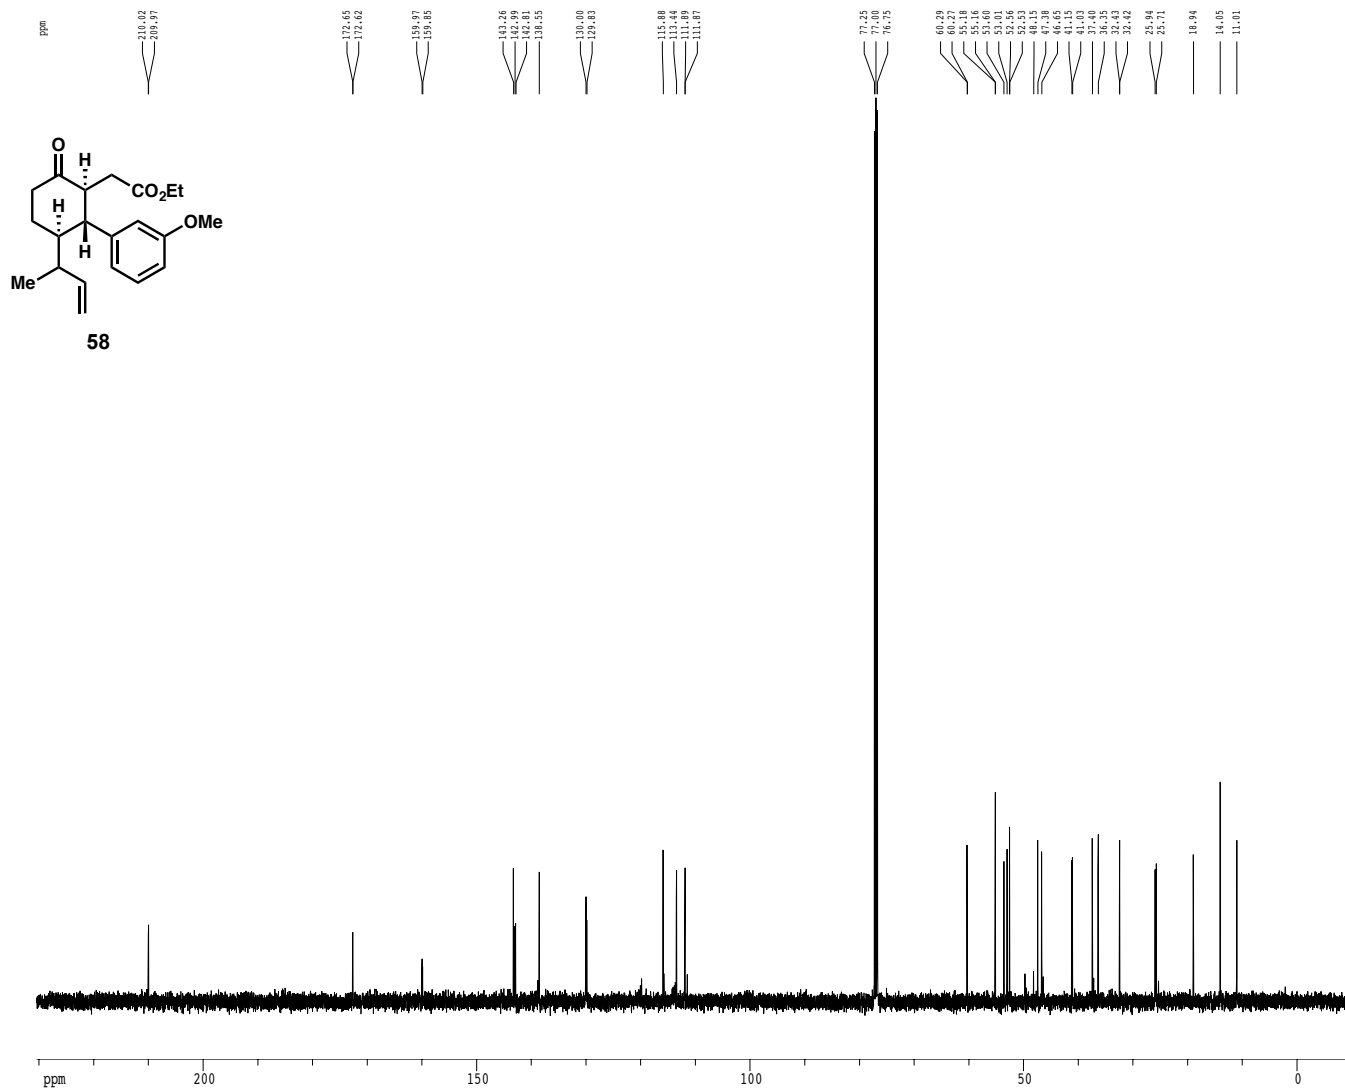

```

Current Data Parameters
USER          roosen
NAME         pcr4.188_isolate
EXPNO        3
PROCNO       1

F2 - Acquisition Parameters
Date_        20150703
Time         12.45
INSTRUM     cryo500
PROBHD      5 mm CPCL 1H-
PULPROG     SpinEcho30pp.prd
TD           65536
SOLVENT     CDCl3
NS           2
DS           160
SWEZ        30303.031 Hz
FIDRES      0.462388 Hz
AQ           1.0813940 sec
RG           650
DW           16.500 usec
DE           6.00 usec
TE           298.2 K
D1           0.50000000 sec
d11          0.03000000 sec
D16          0.00020000 sec
d17          0.00019600 sec
MCREST      0.00000000 sec
MCMCR      0.01500000 sec
P2           33.10 usec

===== CHANNEL f1 =====
NUC1         13C
P1           16.55 usec
P11          500.00 usec
P12          2000.00 usec
PL0          120.00 dB
PL1          -1.00 dB
SFO1        125.7942548 MHz
SP1          2.70 dB
SP2          2.70 dB
SPHM1       Crp60,0.5,20.1
SPHM2       Crp60comp.4
SFOFF1      0.00 Hz
SFOFF2      0.00 Hz

===== CHANNEL f2 =====
CPDPRG2     walz16
NUC2         1H
PCPD2       100.00 usec
PL2         1.60 dB
PL12        24.50 dB
SFO2        500.2225011 MHz

===== GRADIENT CHANNEL =====
GPRM1       SINE.100
GPRM2       SINE.100
GX1         0.00 k
GPX2        0.00 k
GPT1        0.00 k
GPT2        0.00 k
GPE1        30.00 k
GPE2        50.00 k
p15         500.00 usec
p16         1000.00 usec

F2 - Processing parameters
SI           65536
SF           125.7804291 MHz
WDW          EM
SSB          0
LB           1.00 Hz
GB           0
PC           2.00

1D NMR plot parameters
CX           22.80 cm
CY           15.63 cm
F1P         230.380 ppm
F1           28977.29 Hz
F2P         -10.540 ppm
F2           -1235.76 Hz
FPMCM       10.56667 ppm/cm
H1CH        1329.08020 Hz/cm
    
```



1H spectrum

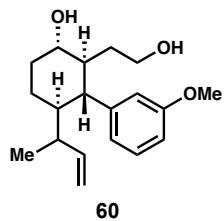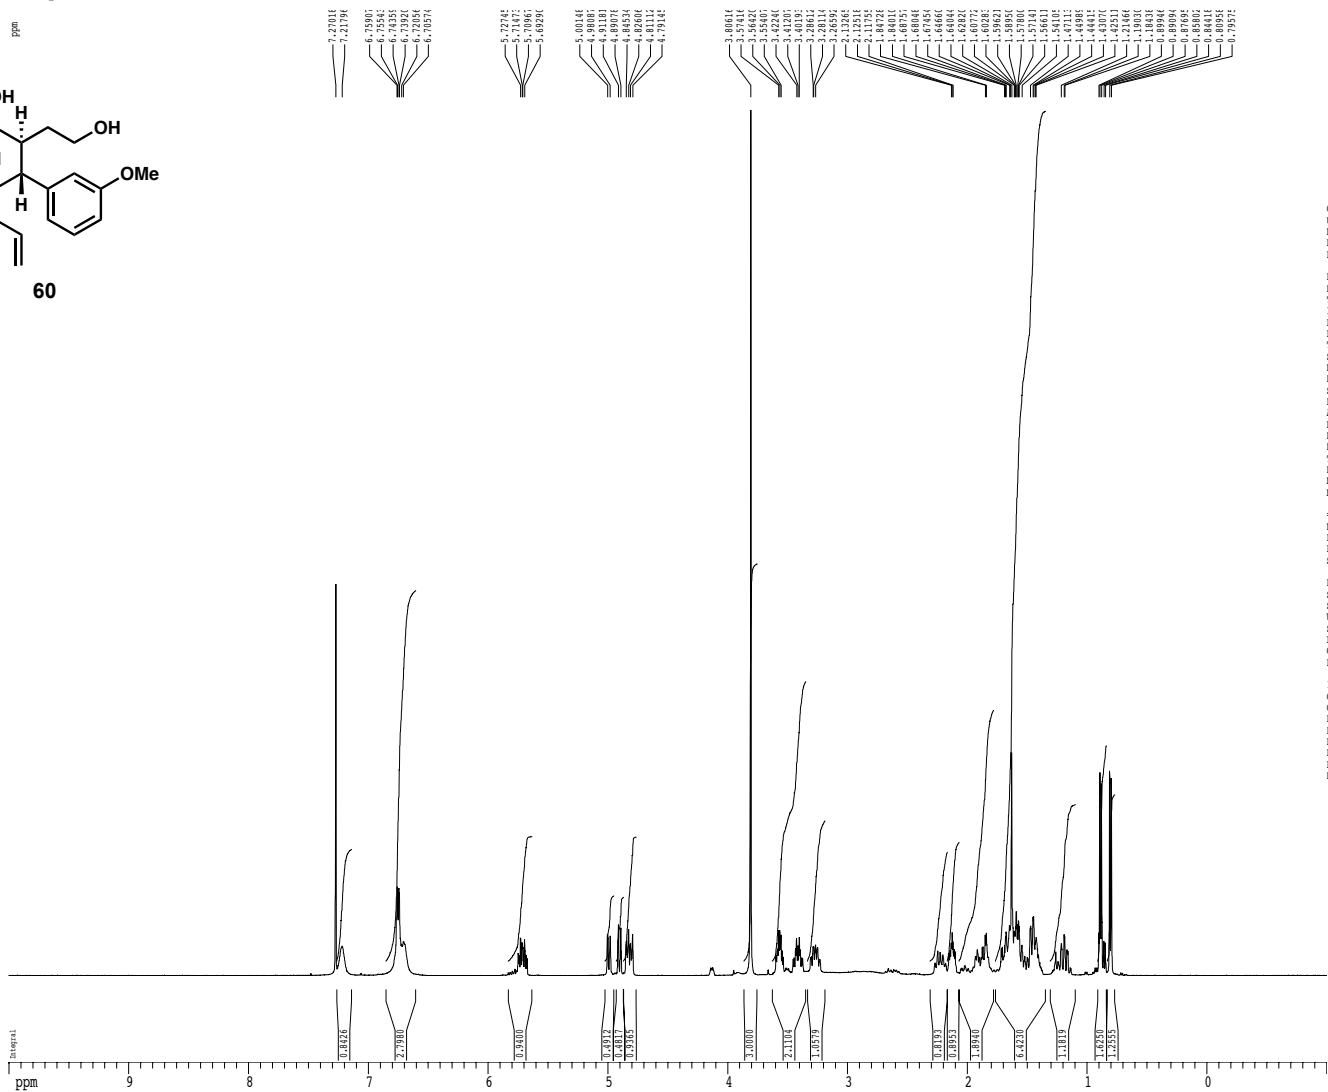

Current Data Parameters  
 USER roosen  
 NAME pcr4.276\_isolate  
 EXPNO 1  
 PROCNO 1

F2 - Acquisition Parameters  
 Date\_ 20151003  
 Time 20.17  
 INSTRUM cryo500  
 PROBRD 5 mm CPYC1 1H-  
 PULPROG zg30  
 TD 32048  
 SOLVENT CDCl3  
 NS 8  
 DS 2  
 SWH 8012.820 Hz  
 FIDRES 0.250026 Hz  
 AQ 1.9998451 sec  
 RG 9  
 DW 62.400 usec  
 DE 6.00 usec  
 TE 298.0 K  
 D1 0.10000000 sec  
 WCRET 0.00000000 sec  
 MCHRX 0.01500000 sec

----- CHANNEL f1 -----  
 NU01 1H  
 P1 7.50 usec  
 PL1 1.60 dB  
 SFO1 500.2239015 MHz

F2 - Processing parameters  
 SI 65536  
 SF 500.2200267 MHz  
 WDW EM  
 SSB 0  
 LB 0.30 Hz  
 GB 0  
 PC 4.00

1D NMR plot parameters  
 CX 22.80 cm  
 CT 15.00 cm  
 FIP 10.000 ppm  
 FI 5002.20 Hz  
 FFP -1.000 ppm  
 FQ -500.22 Hz  
 PPMCM 0.48246 ppm/cm  
 HZCM 241.33423 Hz/cm

Z-restored spin-echo 13C spectrum with 1H decoupling

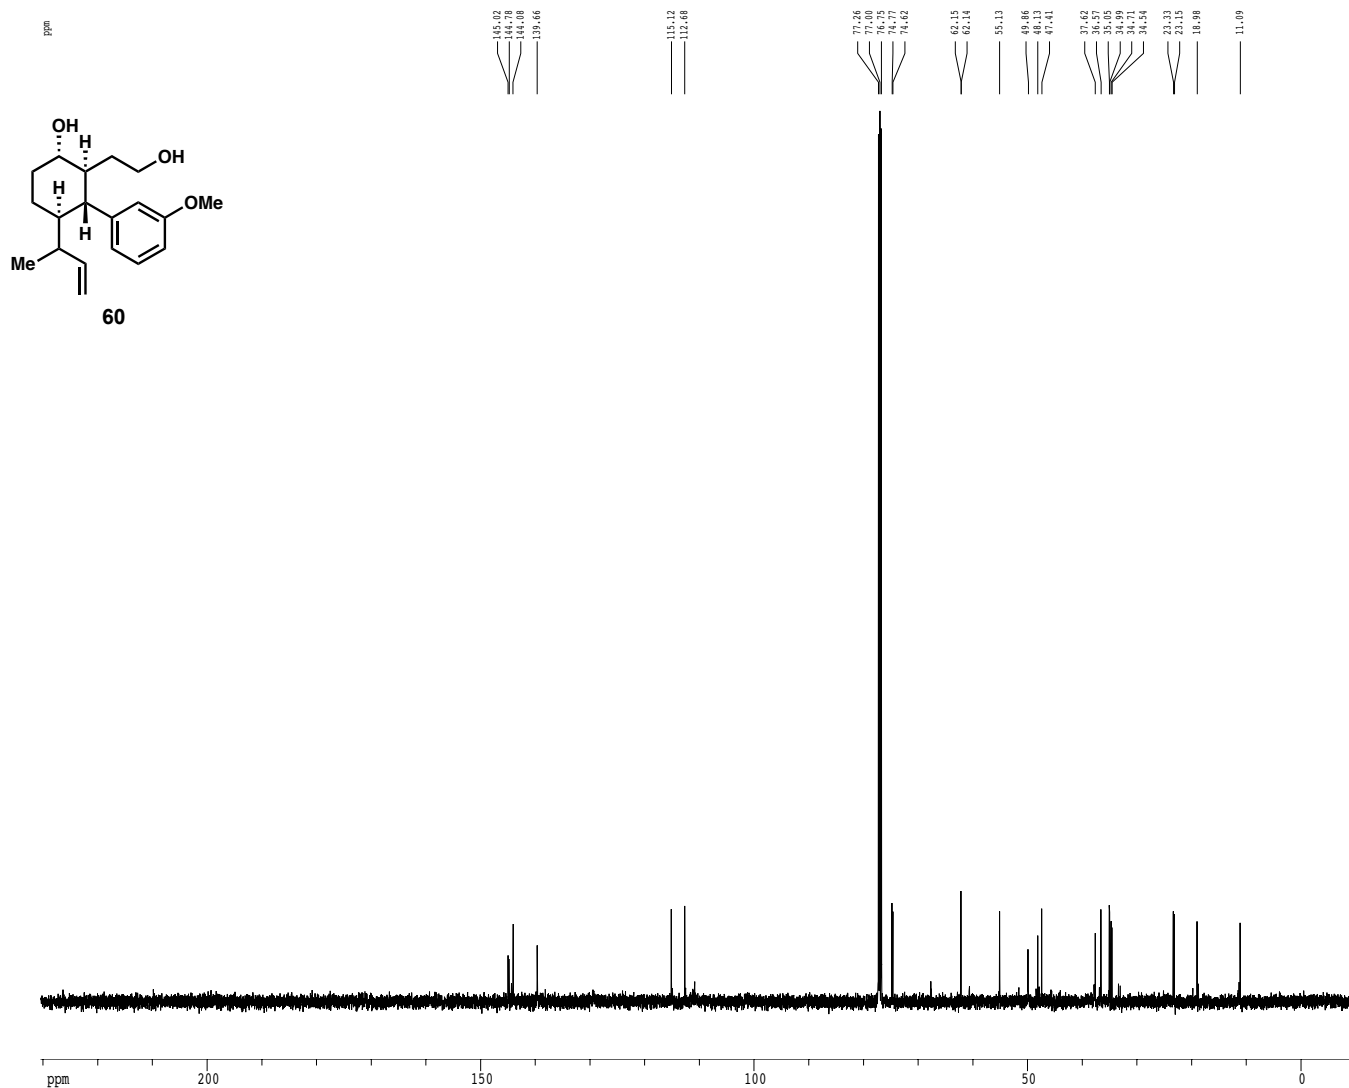

Current Data Parameters  
 USER roosen  
 NAME pcr4.276 isolate  
 EXPNO 2  
 PROCNO 1

F2 - Acquisition Parameters  
 Date 20151003  
 Time 20.20  
 INSTRUM cryo500  
 PROBHD 5 mm CPCL 1H-  
 PULPROG SpinEcho30ppg.prd  
 TD 65536  
 SOLVENT CDCl3  
 NS 392  
 DS 2  
 SWE 30303.031 Hz  
 FIDRES 0.462388 Hz  
 AQ 1.0813940 sec  
 RG 7296.2  
 DW 16.500 usec  
 DE 6.00 usec  
 TE 298.2 K  
 D1 0.50000000 sec  
 d11 0.03000000 sec  
 D16 0.00020000 sec  
 d17 0.00019600 sec  
 MCREST 0.00000000 sec  
 MCHKE 0.01500000 sec  
 P2 33.10 usec

===== CHANNEL f1 =====  
 NUC1 13C  
 P1 16.55 usec  
 PL1 500.00 usec  
 PL2 2000.00 usec  
 PL0 120.00 dB  
 PL1 -1.00 dB  
 SFO1 125.7942548 MHz  
 SF2 2.70 dB  
 SF1 2.70 dB  
 SFO1 Crg60,0.5,20.1  
 SFO2 Crg60comp,4  
 SFOFF1 0.00 Hz  
 SFOFF2 0.00 Hz

===== CHANNEL f2 =====  
 CPDPRG2 waltz16  
 NUC2 1H  
 PCPD2 100.00 usec  
 PL2 1.60 dB  
 PL12 24.50 dB  
 SFO2 500.2225011 MHz

===== GRADIENT CHANNEL =====  
 GPRAM1 SINE.100  
 GPRAM2 SINE.100  
 GX1 0.00 %  
 GPX2 0.00 %  
 GPY1 0.00 %  
 GPY2 0.00 %  
 GPZ1 30.00 %  
 GPZ2 50.00 %  
 p15 500.00 usec  
 p16 1000.00 usec

F2 - Processing parameters  
 SI 65536  
 SF 125.7804282 MHz  
 MW 80  
 SSB 0  
 LB 1.00 Hz  
 GB 0  
 PC 2.00

1D NMR plot parameters  
 CX 22.80 cm  
 CY 15.60 cm  
 F1P 230.387 ppm  
 F1 28978.21 Hz  
 F2P -10.533 ppm  
 F2 -1234.82 Hz  
 FPMCH 10.56667 ppm/cm  
 HCHC 1329.08032 Hz/cm

1H spectrum

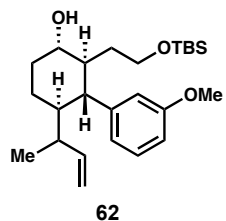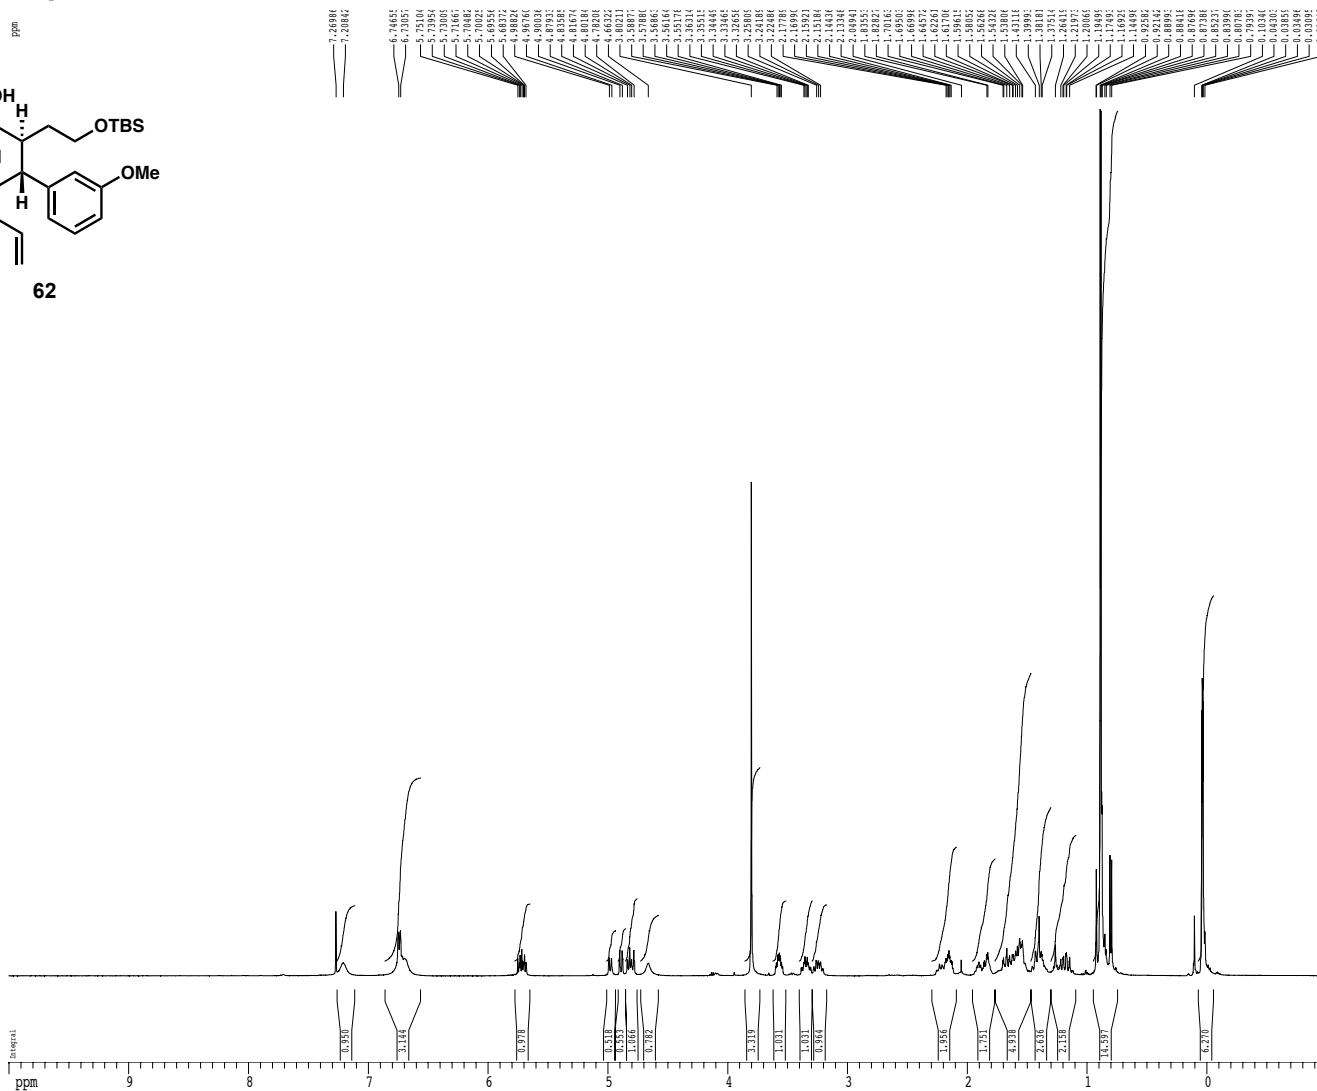

Current Data Parameters  
 USER roosen  
 NAME pcr4.215\_isolate  
 EXPNO 3  
 PROCNO 1

F2 - Acquisition Parameters  
 Date\_ 20150713  
 Time 22.23  
 INSTRUM gn500  
 PROBRD 5 mm broadband  
 PULPROG zg30  
 TD 32048  
 SOLVENT CDCl3T  
 NS 8  
 DS 2  
 SWH 8012.820 Hz  
 FIDRES 0.250026 Hz  
 AQ 1.998451 sec  
 RG 80.6  
 DW 62.400 usec  
 DE 6.00 usec  
 TE 298.0 K  
 D1 0.10000000 sec  
 MCKEY 0.00000000 sec  
 NUCYR 0.01500000 sec

===== CHANNEL f1 =====  
 NUCL 1H  
 P1 12.00 usec  
 PL1 -5.80 dB  
 SF01 499.1834943 MHz

F2 - Processing parameters  
 SI 65536  
 SF 499.1800225 MHz  
 WDW EM  
 SSB 0  
 LB 0.30 Hz  
 GB 0  
 PC 1.00

1D NMR plot parameters  
 CX 22.80 cm  
 CY 15.00 cm  
 F1P 10.000 ppm  
 F1 4991.80 Hz  
 F2P -1.000 ppm  
 F2 -499.18 Hz  
 FFCM 0.48246 ppm/cm  
 HZCM 240.83247 Hz/cm

13C spectrum with 1H decoupling

ppm

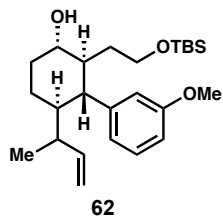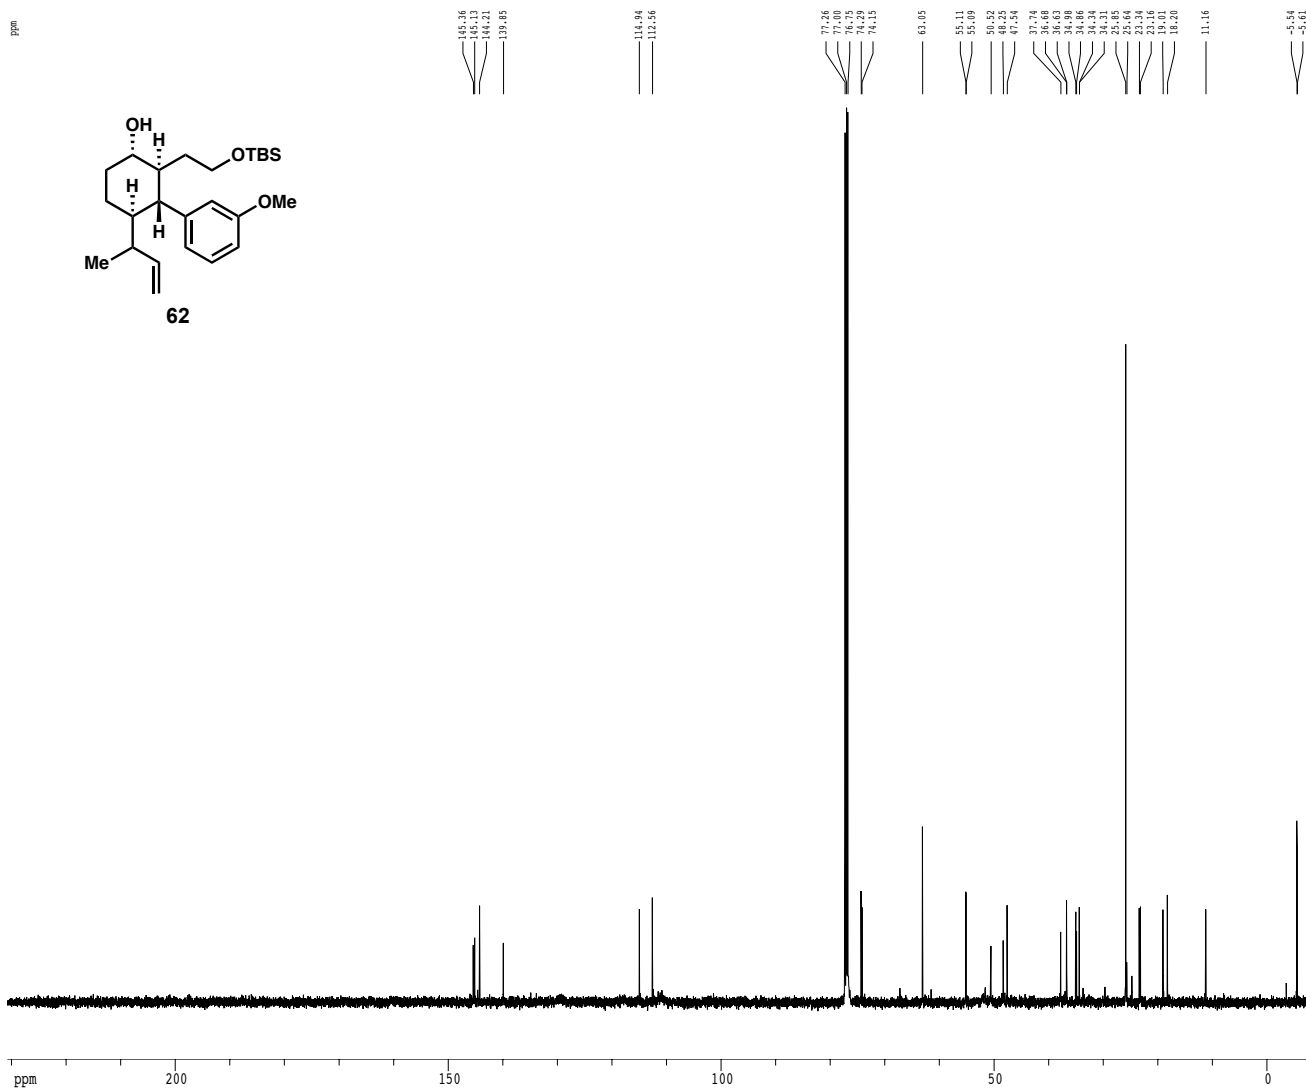

```

Current Data Parameters
USER          roosen
NAME         pcr4.215_isolate
EXPNO        2
PROCNO       1

F2 - Acquisition Parameters
Date_        20150713
Time         22.27
INSTRUM      gn500
PROBHD       5 mm broadband
PULPROG      zgpg30
TD           65536
SOLVENT      CDCl3
NS           864
DS           2
SWH          30303.031 Hz
FIDRES       0.462388 Hz
AQ           1.0813940 sec
RG           4597.6
DM           16.500 usec
DE           4.50 usec
TE           298.0 K
D1           1.5000000 sec
d11          0.0300000 sec
MCHEST       0.0000000 sec
MCNRX        0.0150000 sec

----- CHANNEL f1 -----
NUC1          13C
P1            9.00 usec
PL1           -9.00 dB
SFO1         125.5127181 MHz

===== CHANNEL f2 =====
CPDPRG2      waltz16
NUC2          1H
PCPD2        80.00 usec
PL2           -3.00 dB
PL12         12.80 dB
SFO2         499.1824959 MHz

F2 - Processing parameters
SI           65536
SF           125.5189180 MHz
WDW          EM
SSB          0
LB           1.00 Hz
GB           0
PC           2.00

ID NMR plot parameters
CX           22.80 cm
CY           15.45 cm
F1P          230.655 ppm
F1           28951.61 Hz
F2P          -10.767 ppm
F2           -1351.42 Hz
PPMCM        10.58869 ppm/cm
HZCM         1329.08032 Hz/cm
    
```

1H spectrum

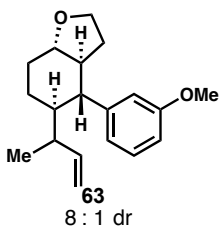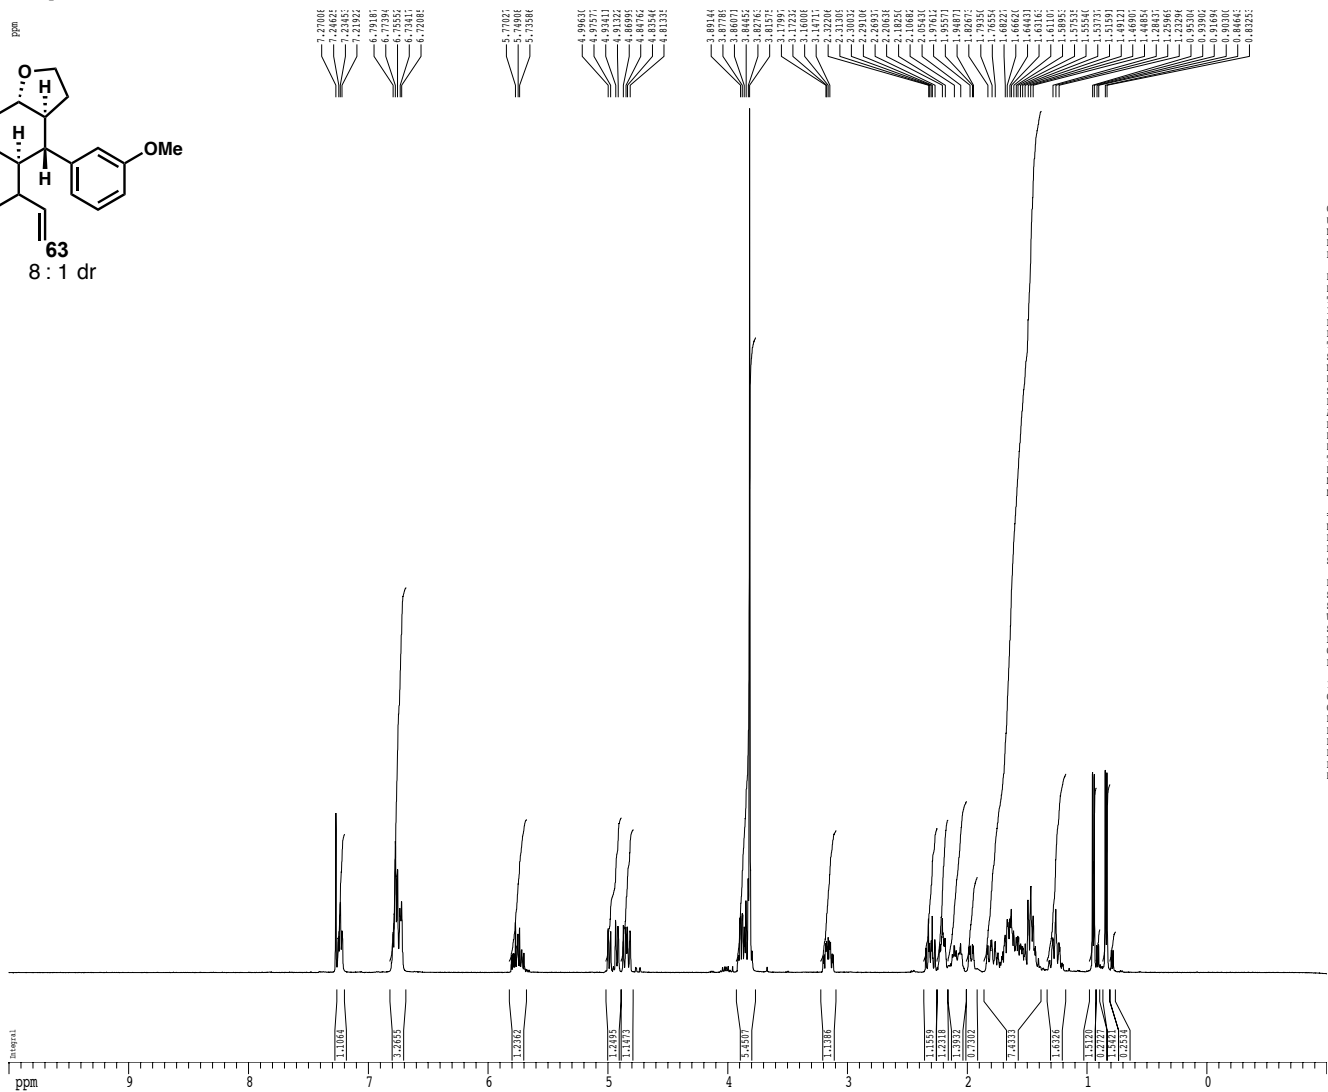

```

Current Data Parameters
USER roosen
NAME pcr4.222_isolate
EXPNO 1
PROCNO 1

F2 - Acquisition Parameters
Date_ 20150721
Time 11.05
INSTRUM cryo500
PROBHD 5 mm CPYC1 1H-
PULPROG zg30
TD 32048
SOLVENT CDCl3
NS 8
DS 2
SWH 8012.820 Hz
FIDRES 0.250026 Hz
AQ 1.9998451 sec
RG 7.1
DM 62.400 usec
DE 6.00 usec
TE 298.0 K
D1 0.10000000 sec
WCREST 0.00000000 sec
MCHX 0.01500000 sec

----- CHANNEL f1 -----
NUC1 1H
P1 7.50 usec
PE1 1.60 dB
SFO1 500.2233015 MHz

F2 - Processing parameters
SI 65536
SF 500.220267 MHz
WDW EM
SSB 0
LB 0.30 Hz
GB 0
PC 4.00

1D NMR plot parameters
CX 22.80 cm
CT 15.00 cm
FIP 10.000 ppm
F1 5002.20 Hz
FPP -1.000 ppm
FQ -500.22 Hz
PPHM 0.48246 ppm/cm
HSCM 241.33423 Hz/cm
    
```

Z-restored spin-echo 13C spectrum with 1H decoupling

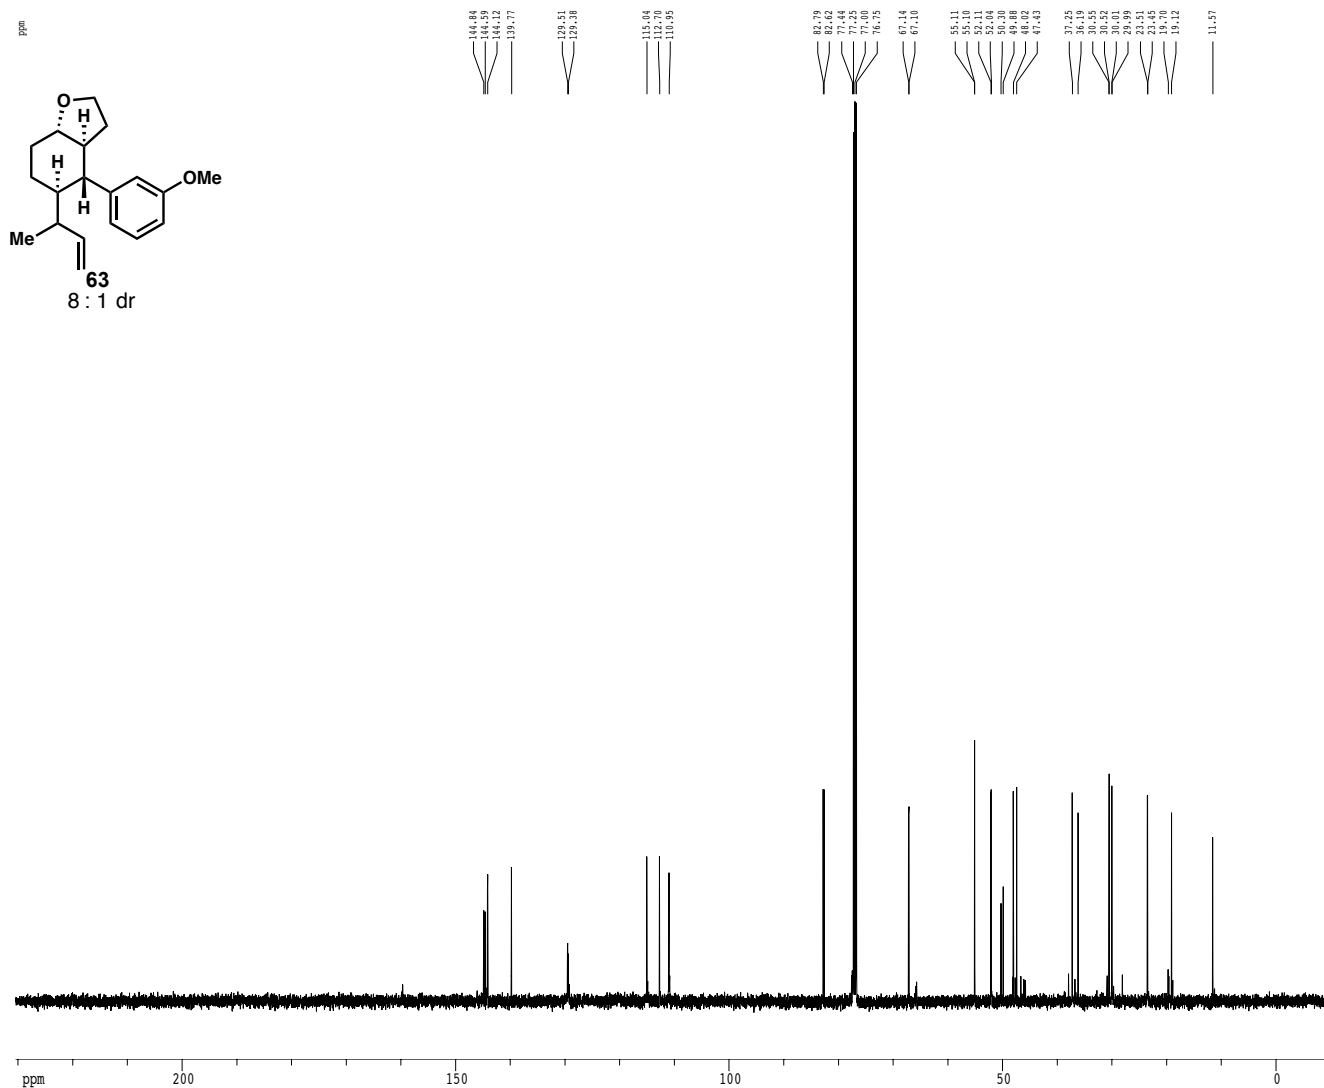

```

Current Data Parameters
USER          roosen
NAME         pcr4.222_isolate
EXPNO        2
PROCNO       1

F2 - Acquisition Parameters
Date_         20150721
Time          11.07
INSTRUM      cryo500
PROBHD       5 mm CPCL 1H-
PULPROG      SpinEcho30pp.prd
TD            65536
SOLVENT      CDCl3
NS            384
DS            2
SWEZ         30303.031 Hz
FIDRES       0.462388 Hz
AQ           1.0813940 sec
RG           2896.3
DW           16.500 usec
DE           6.00 usec
TE           298.2 K
D1           0.50000000 sec
d11          0.03000000 sec
d16          0.00000000 sec
d17          0.00019600 sec
MCREST       0.00000000 sec
MCMXR       0.01500000 sec
P2           33.10 usec

===== CHANNEL f1 =====
NUC1         13C
P1           16.55 usec
P11          500.00 usec
P12          2000.00 usec
PL0          120.00 dB
PL1          -1.00 dB
SFO1         125.7942648 MHz
SF1          2.70 dB
SF2          2.70 dB
SFO2         Cmp60,0.5,20.1
SFO3         Cmp60comp.4
SFOFF1       0.00 Hz
SFOFF2       0.00 Hz

===== CHANNEL f2 =====
CPDPRG2      walz16
NUC2         1H
PCPD2        100.00 usec
PL2          1.60 dB
PL12         24.50 dB
SFO2         500.2225011 MHz

===== GRADIENT CHANNEL =====
GPRAM1       SINE.100
GPRAM2       SINE.100
GFX1         0.00 k
GFX2         0.00 k
GPT1         0.00 k
GPT2         0.00 k
GPT3         30.00 k
GPT4         50.00 k
p15          500.00 usec
p16          1000.00 usec

F2 - Processing parameters
SI           65536
SF           125.7804286 MHz
WDW          EM
SSB          0
LB           1.00 Hz
GB           0
PC           2.00

1D NMR plot parameters
CX           22.80 cm
CY           15.63 cm
F1P          230.384 ppm
F1           28977.75 Hz
F2P          -10.536 ppm
F2           -1235.2 Hz
FPMCM        10.56667 ppm/cm
H1CH         1329.08032 Hz/cm
    
```

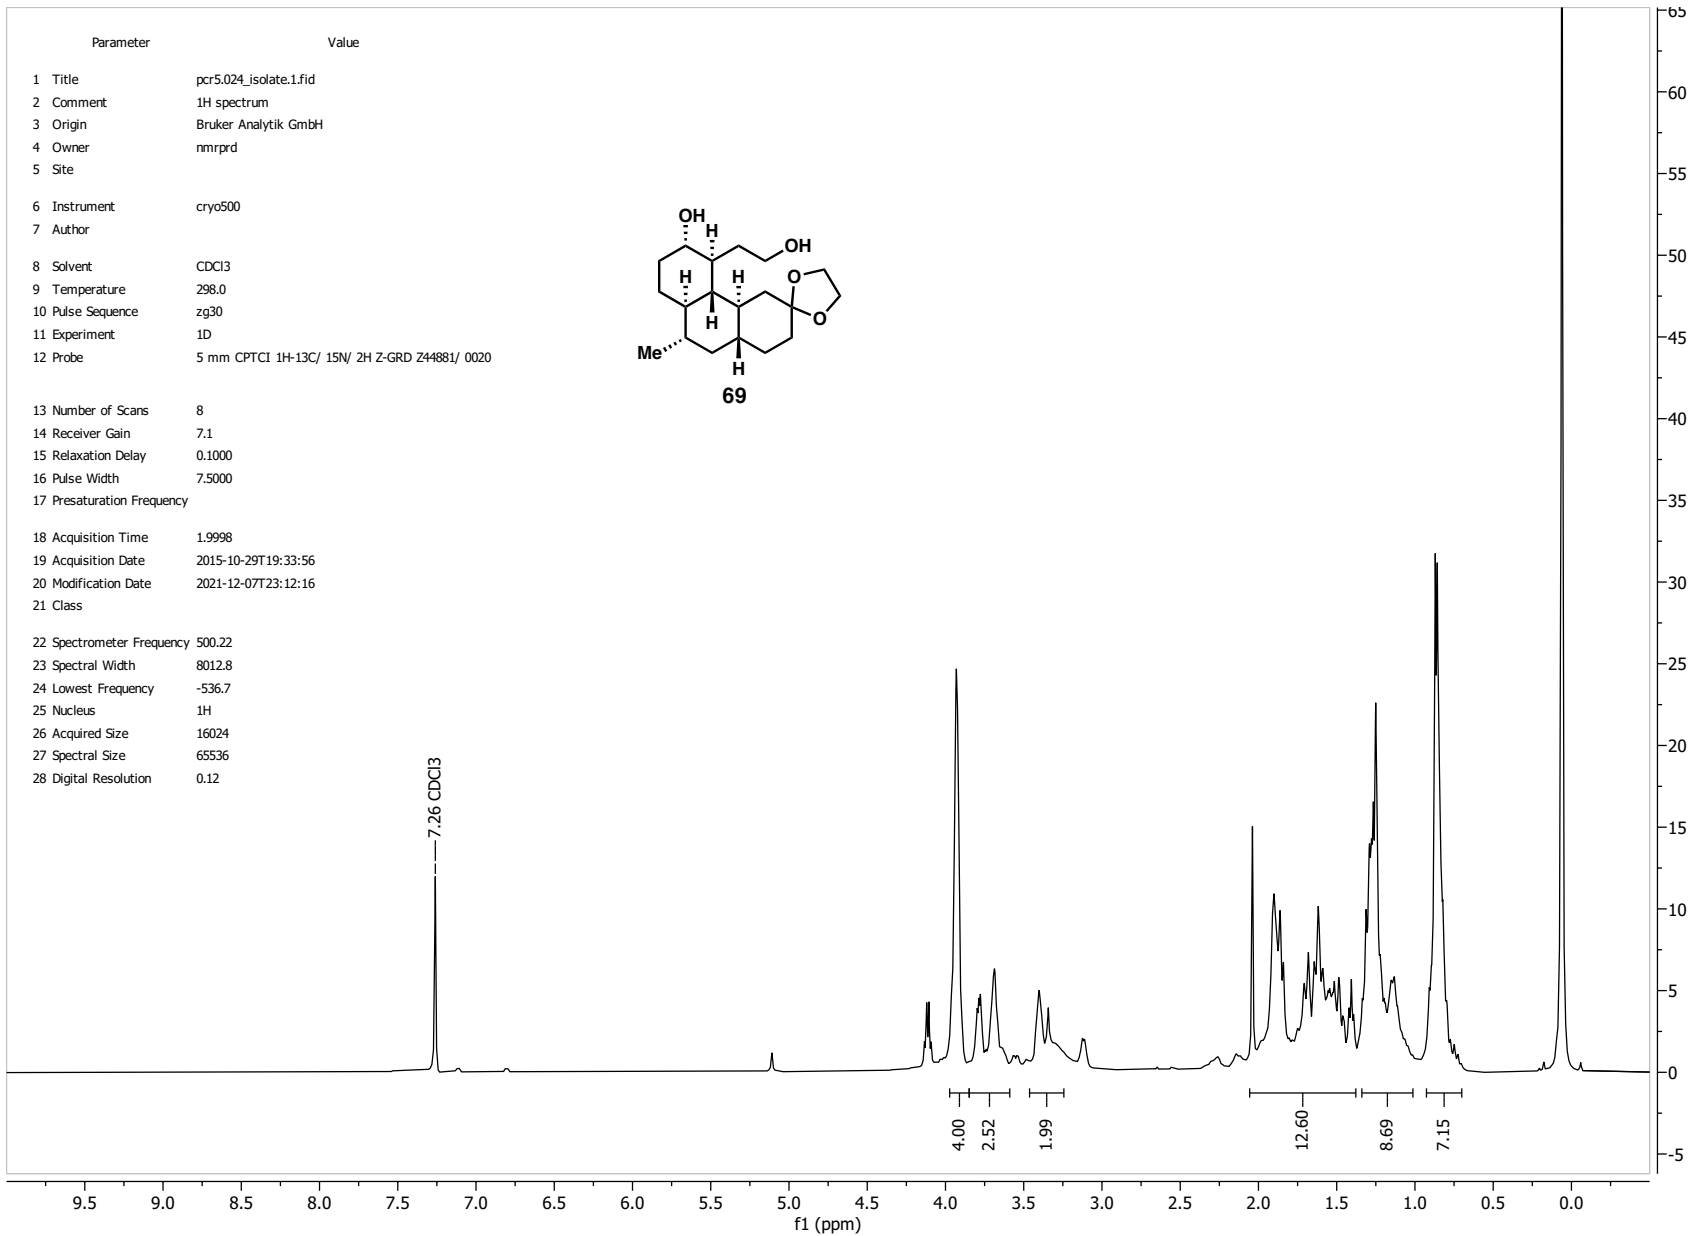

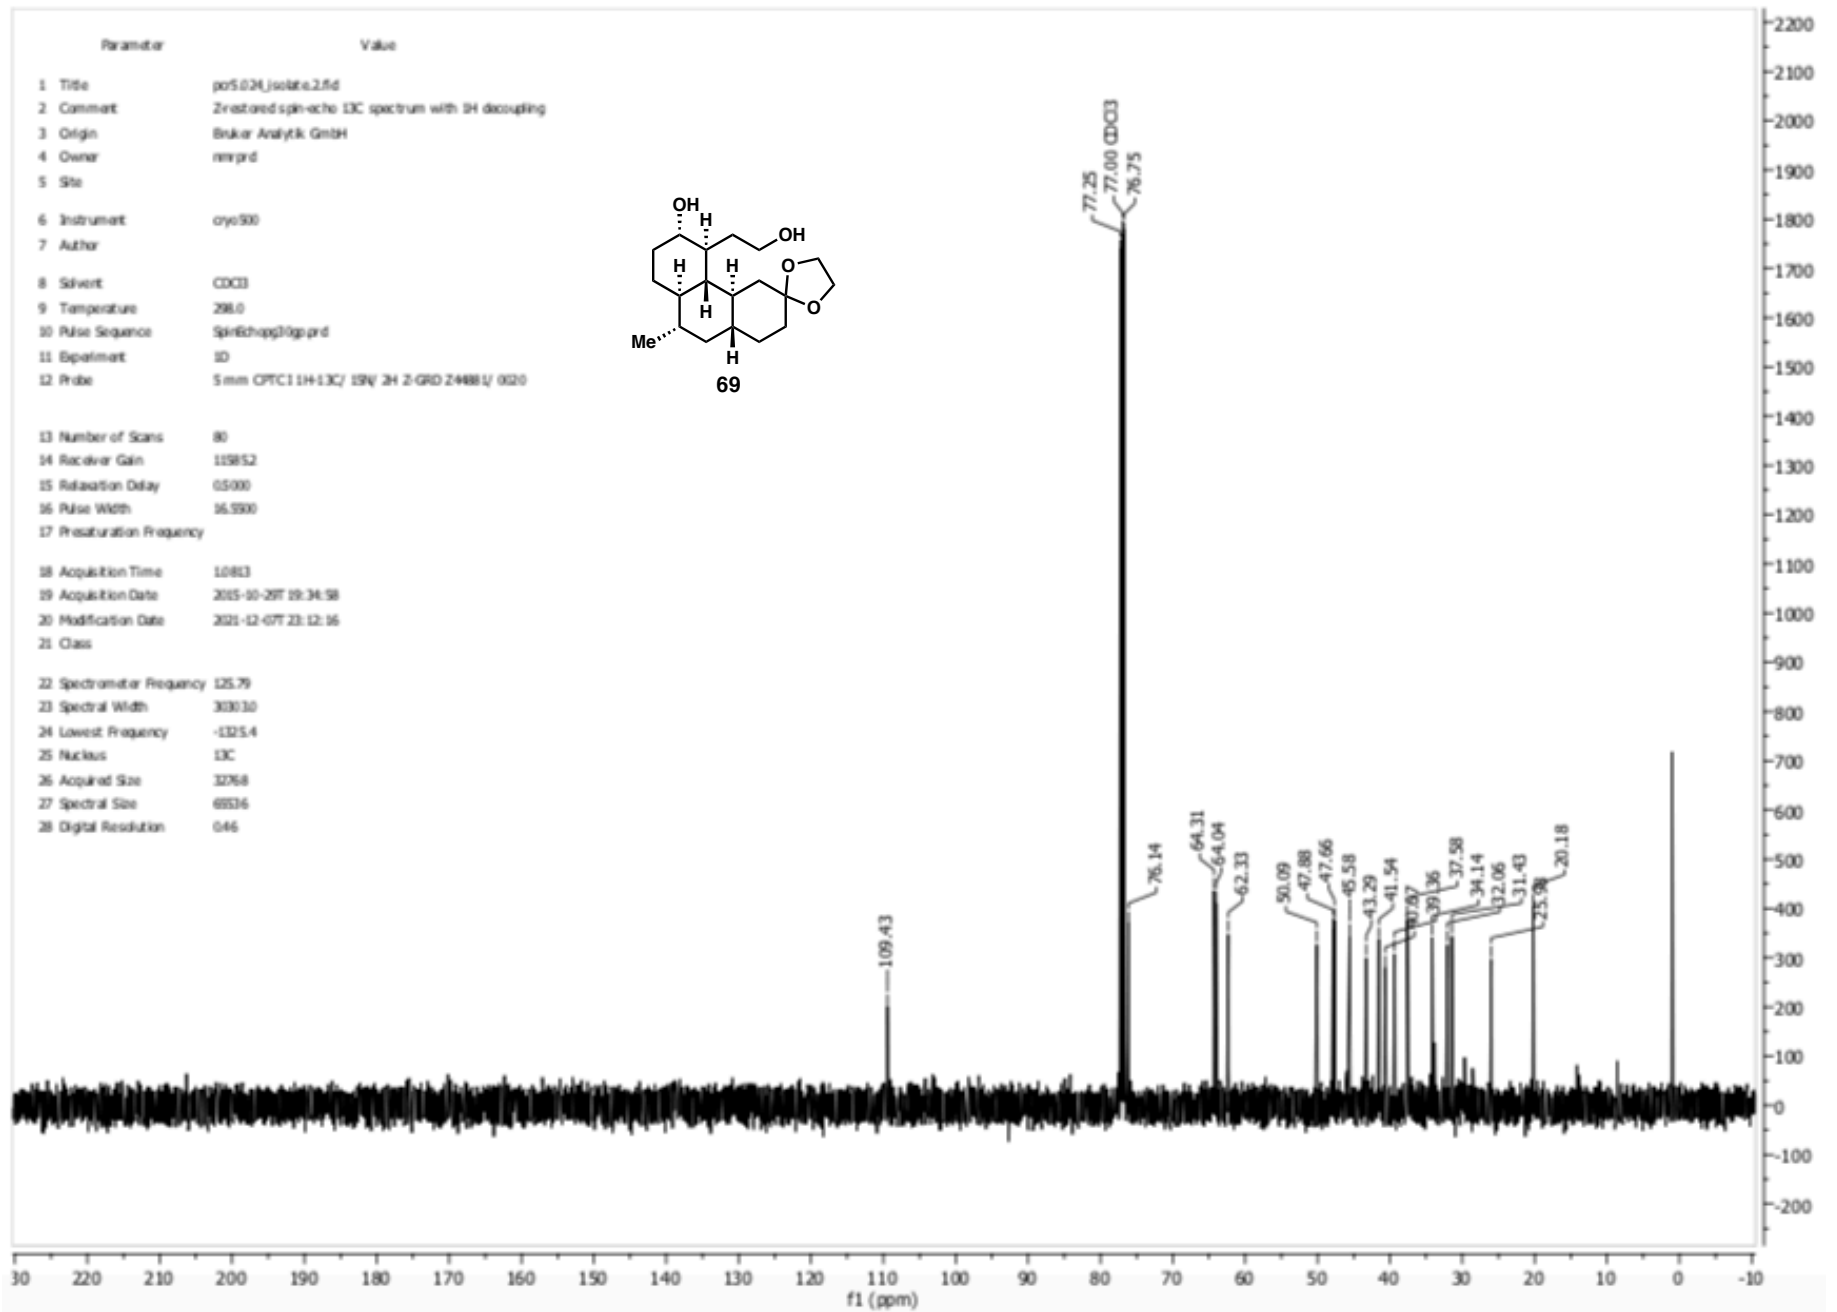



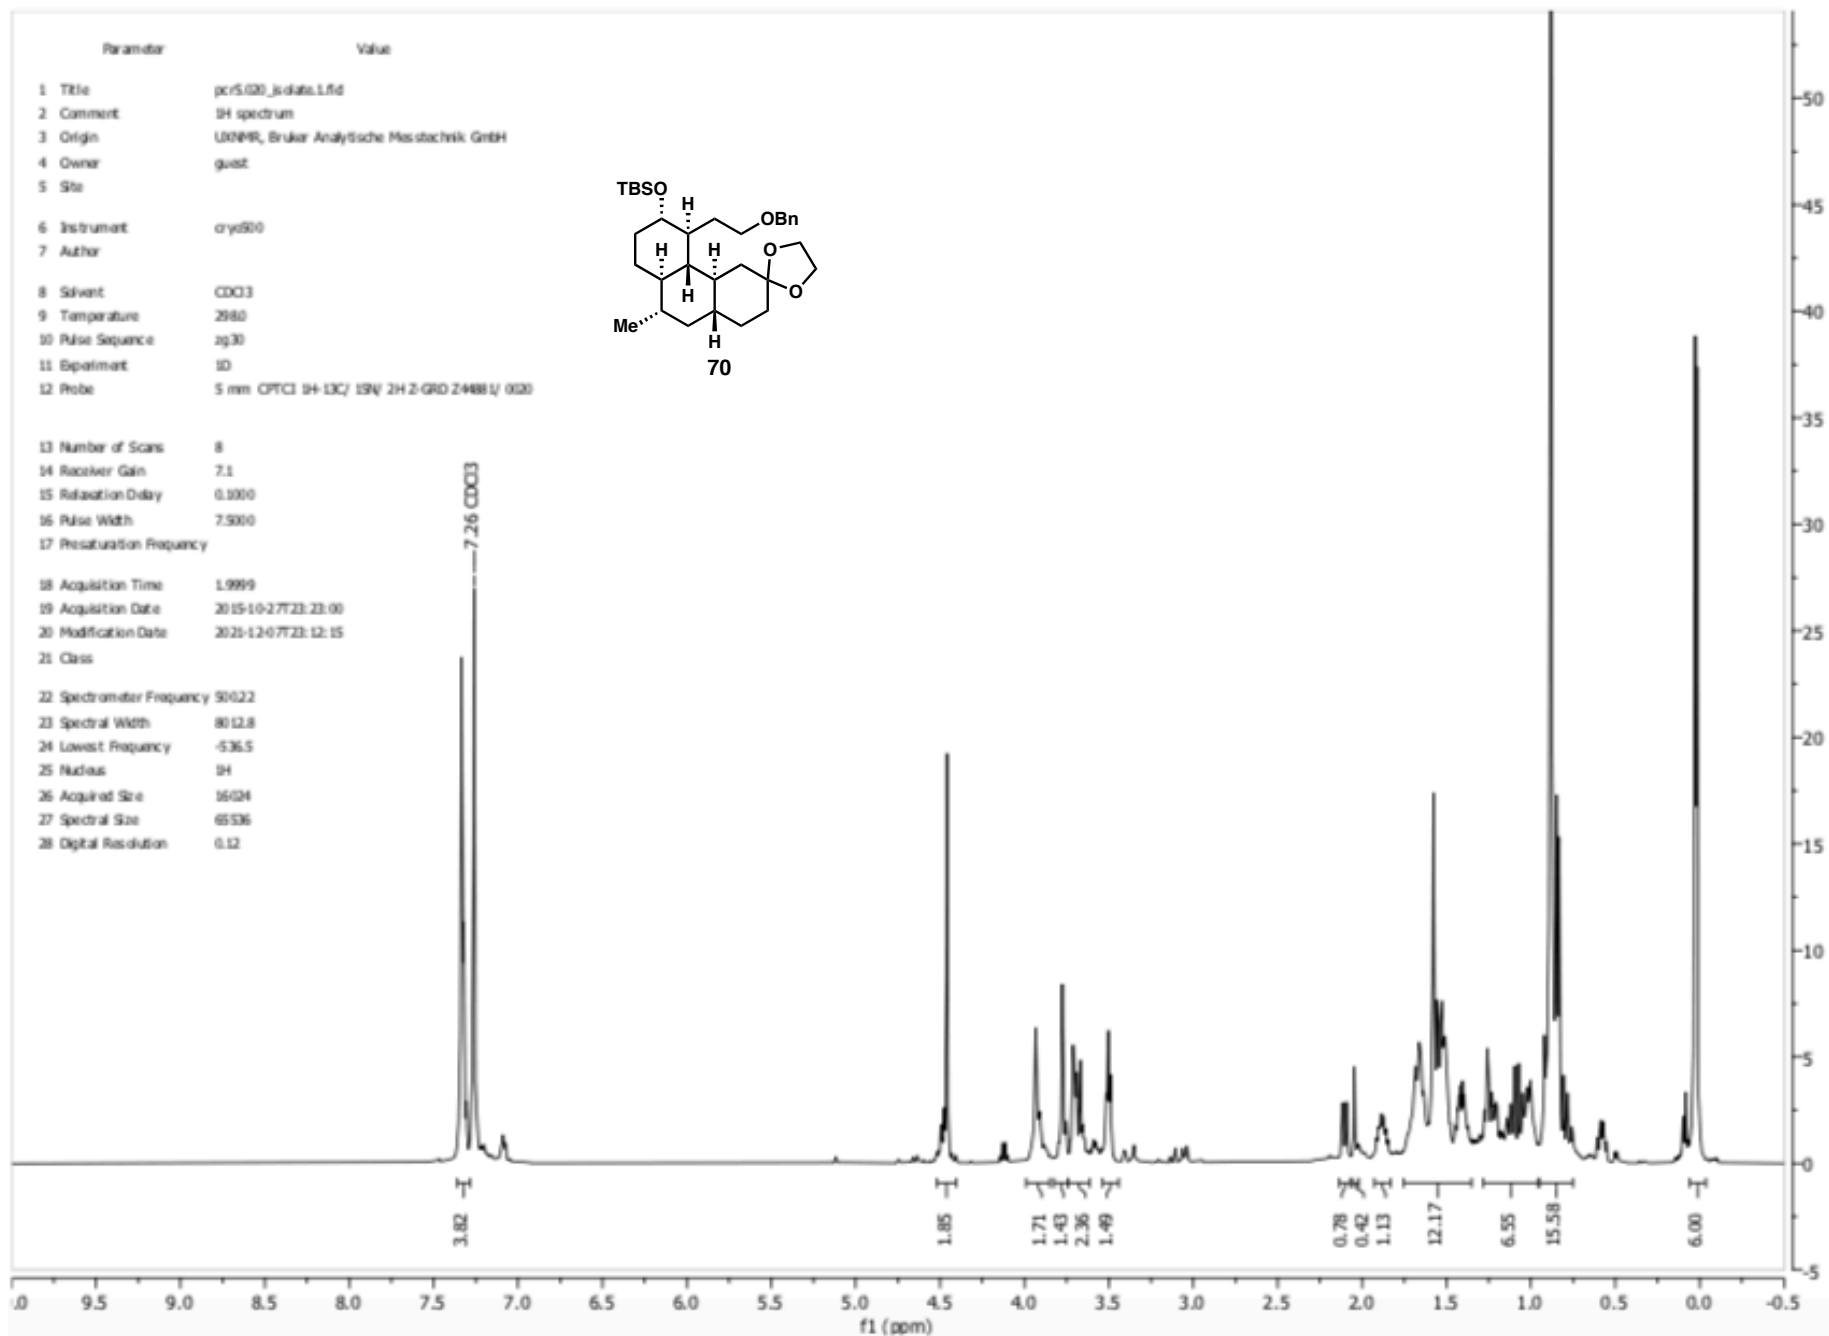

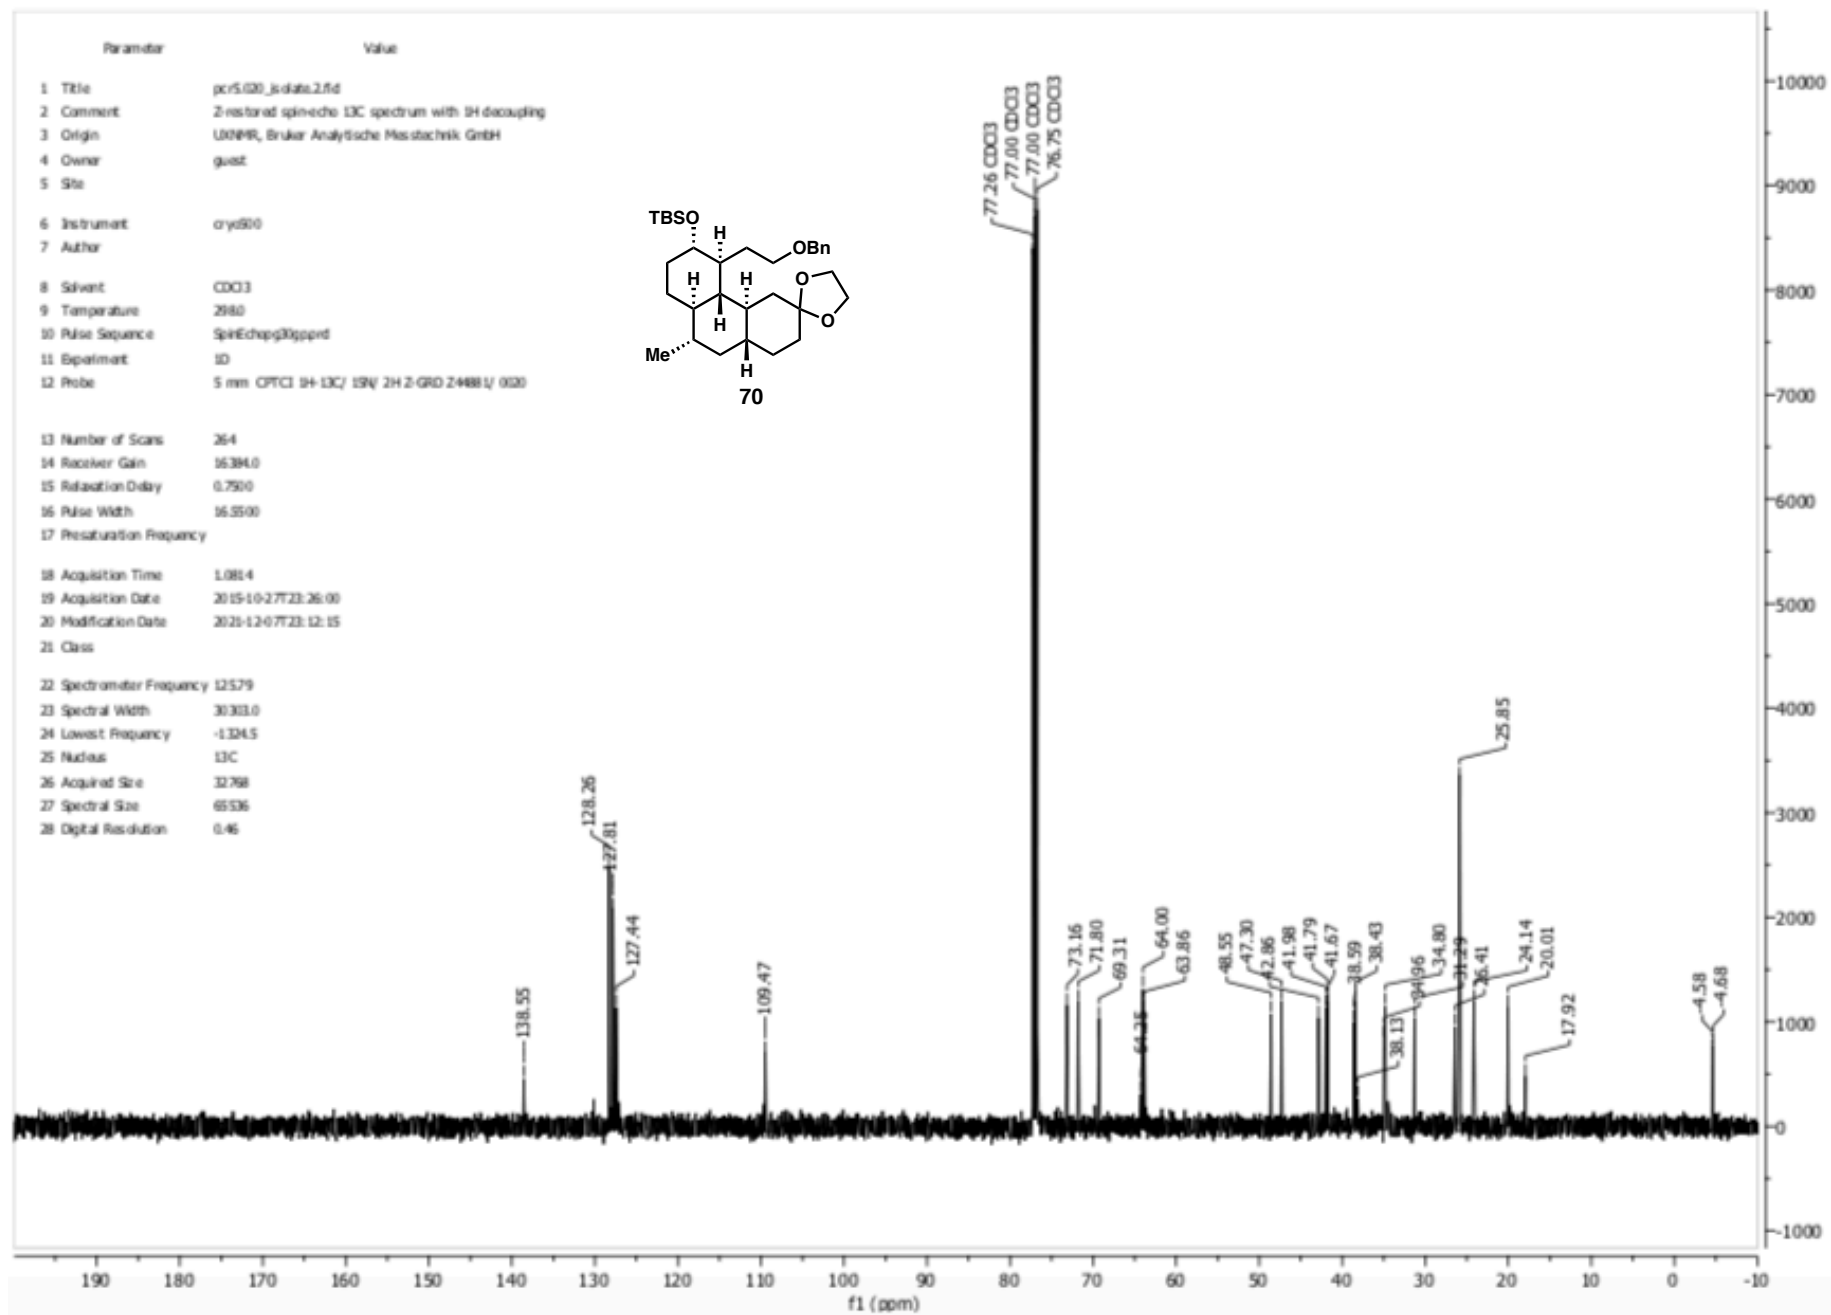

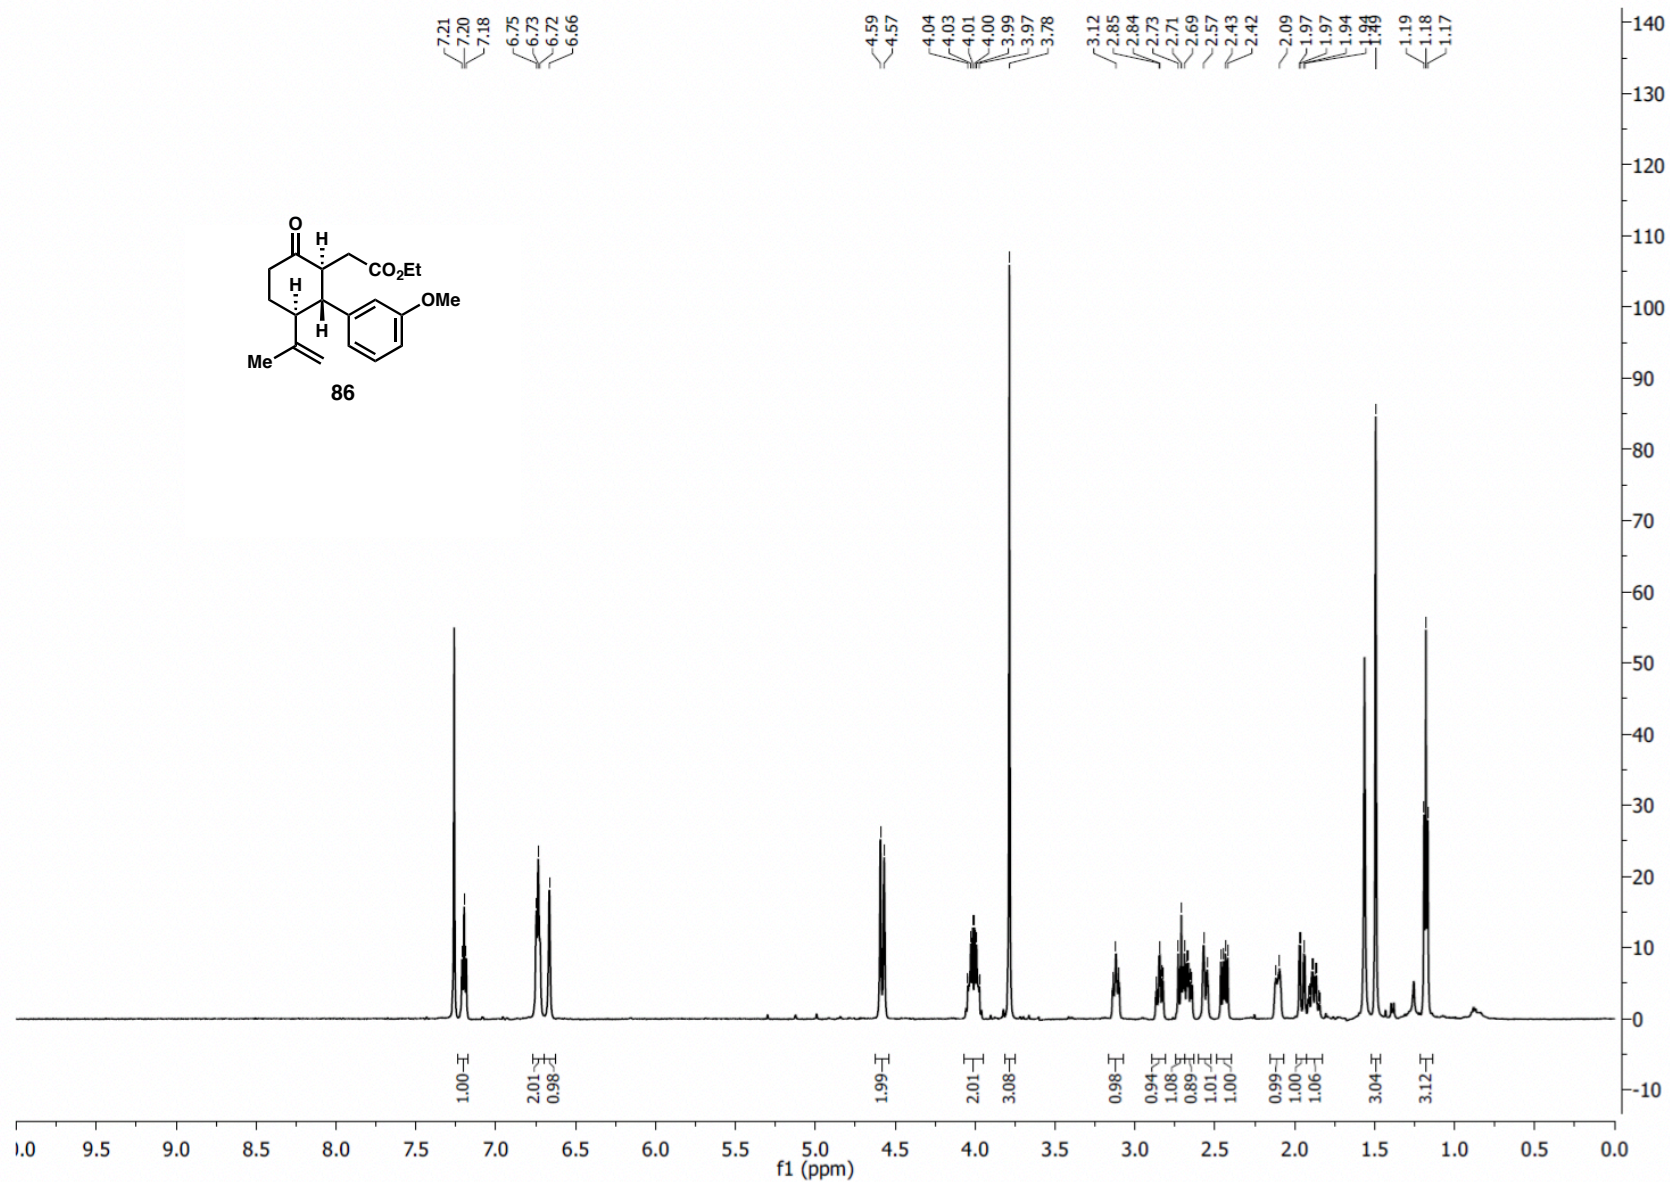

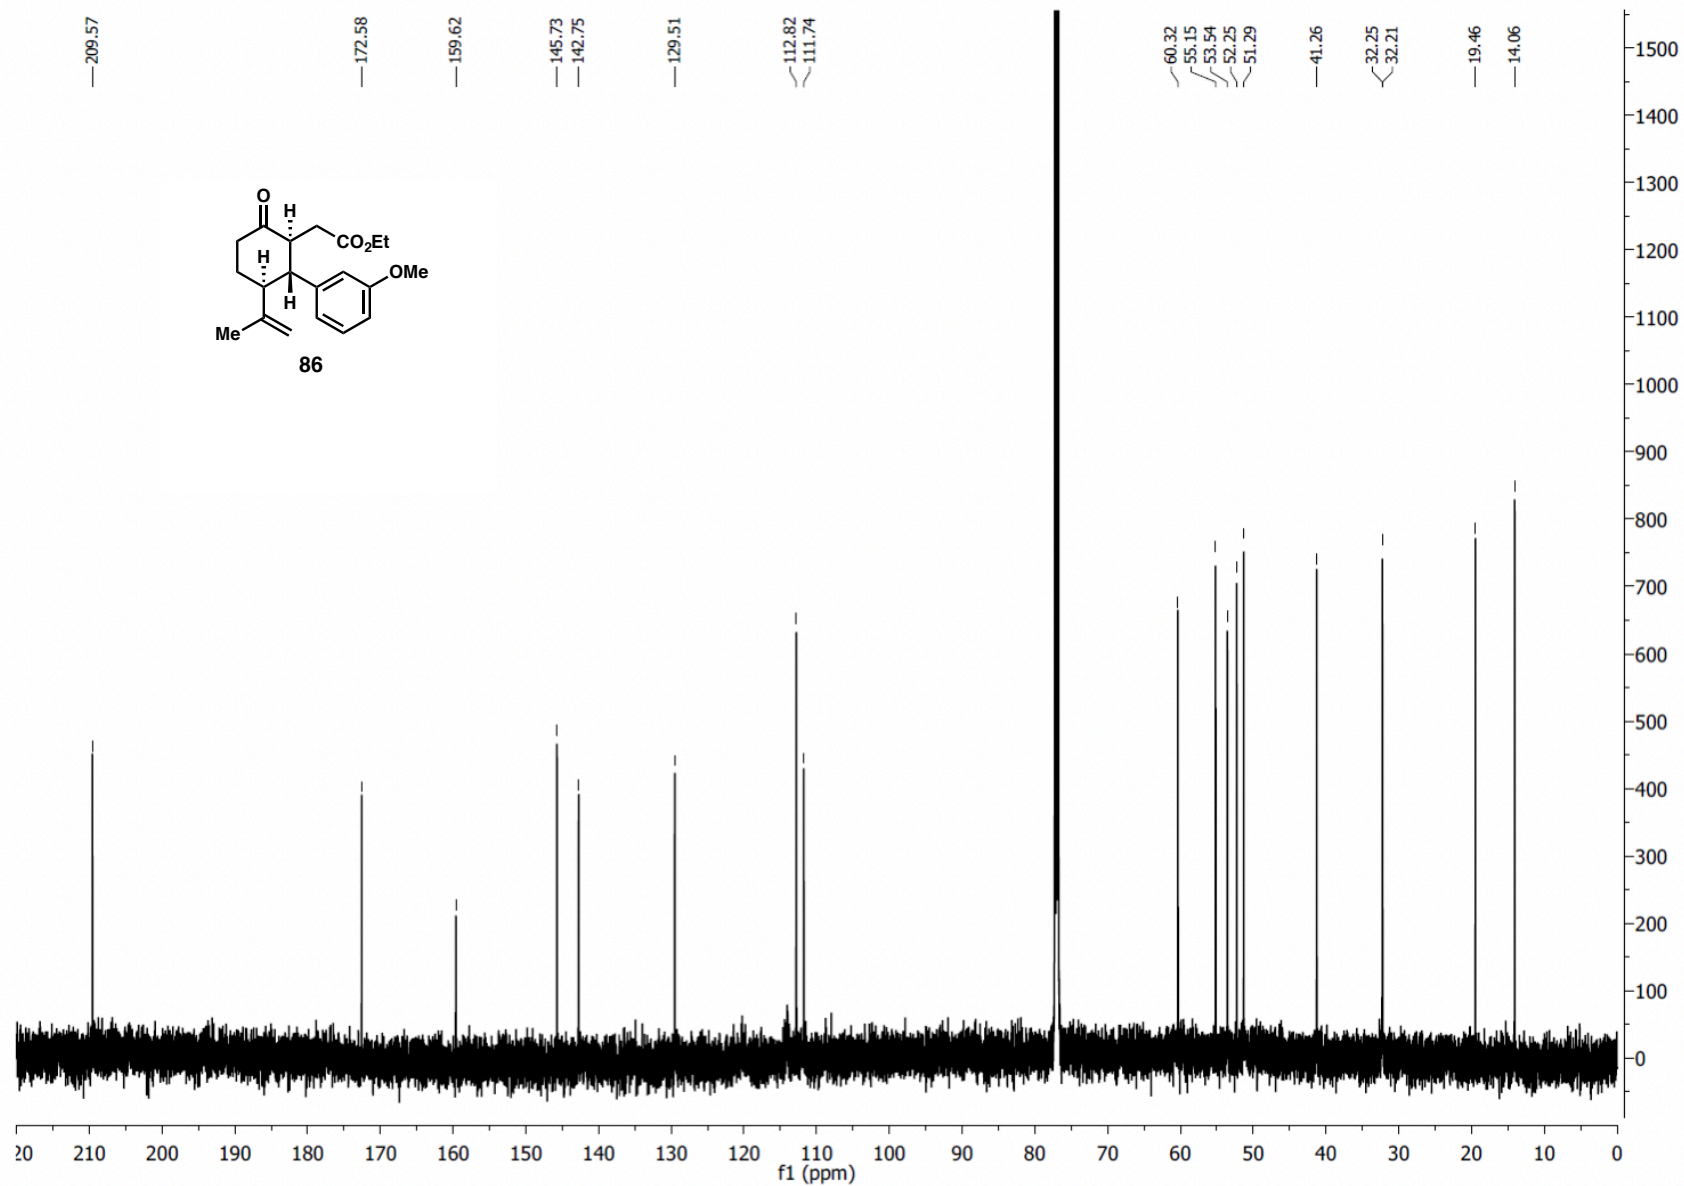

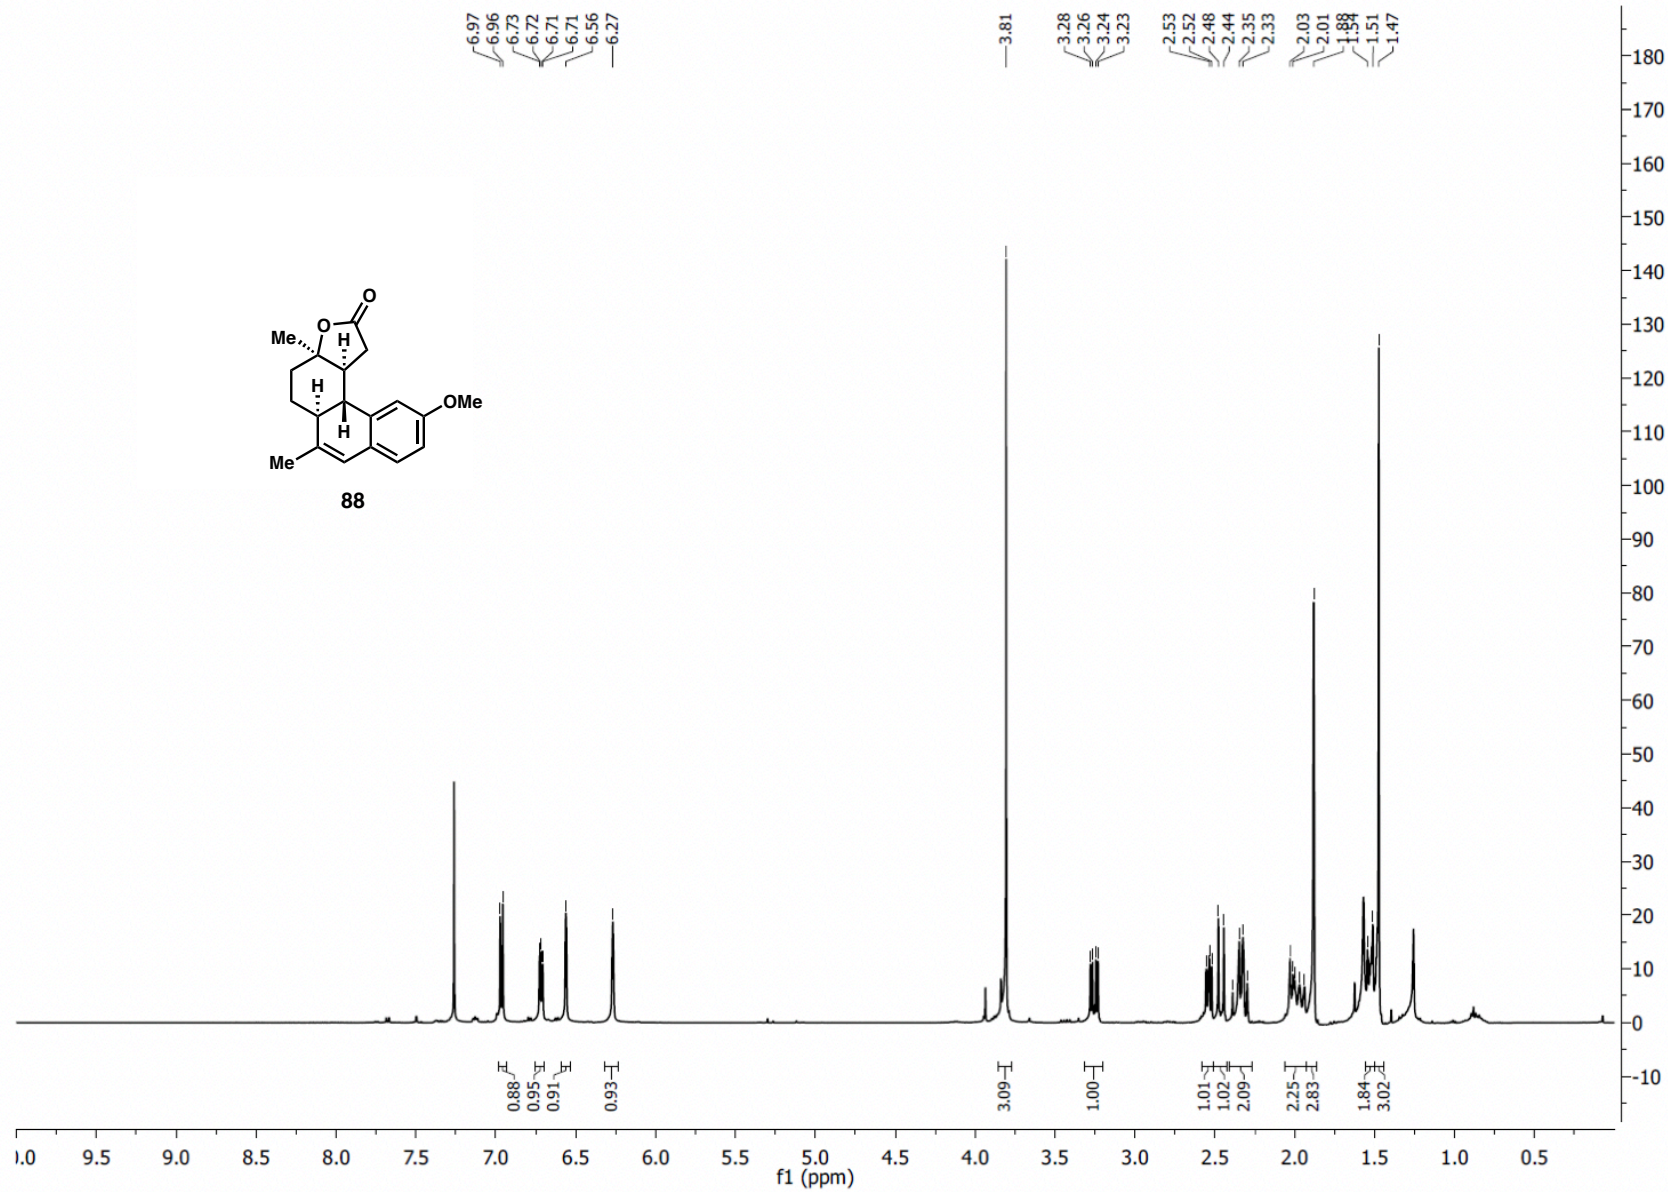

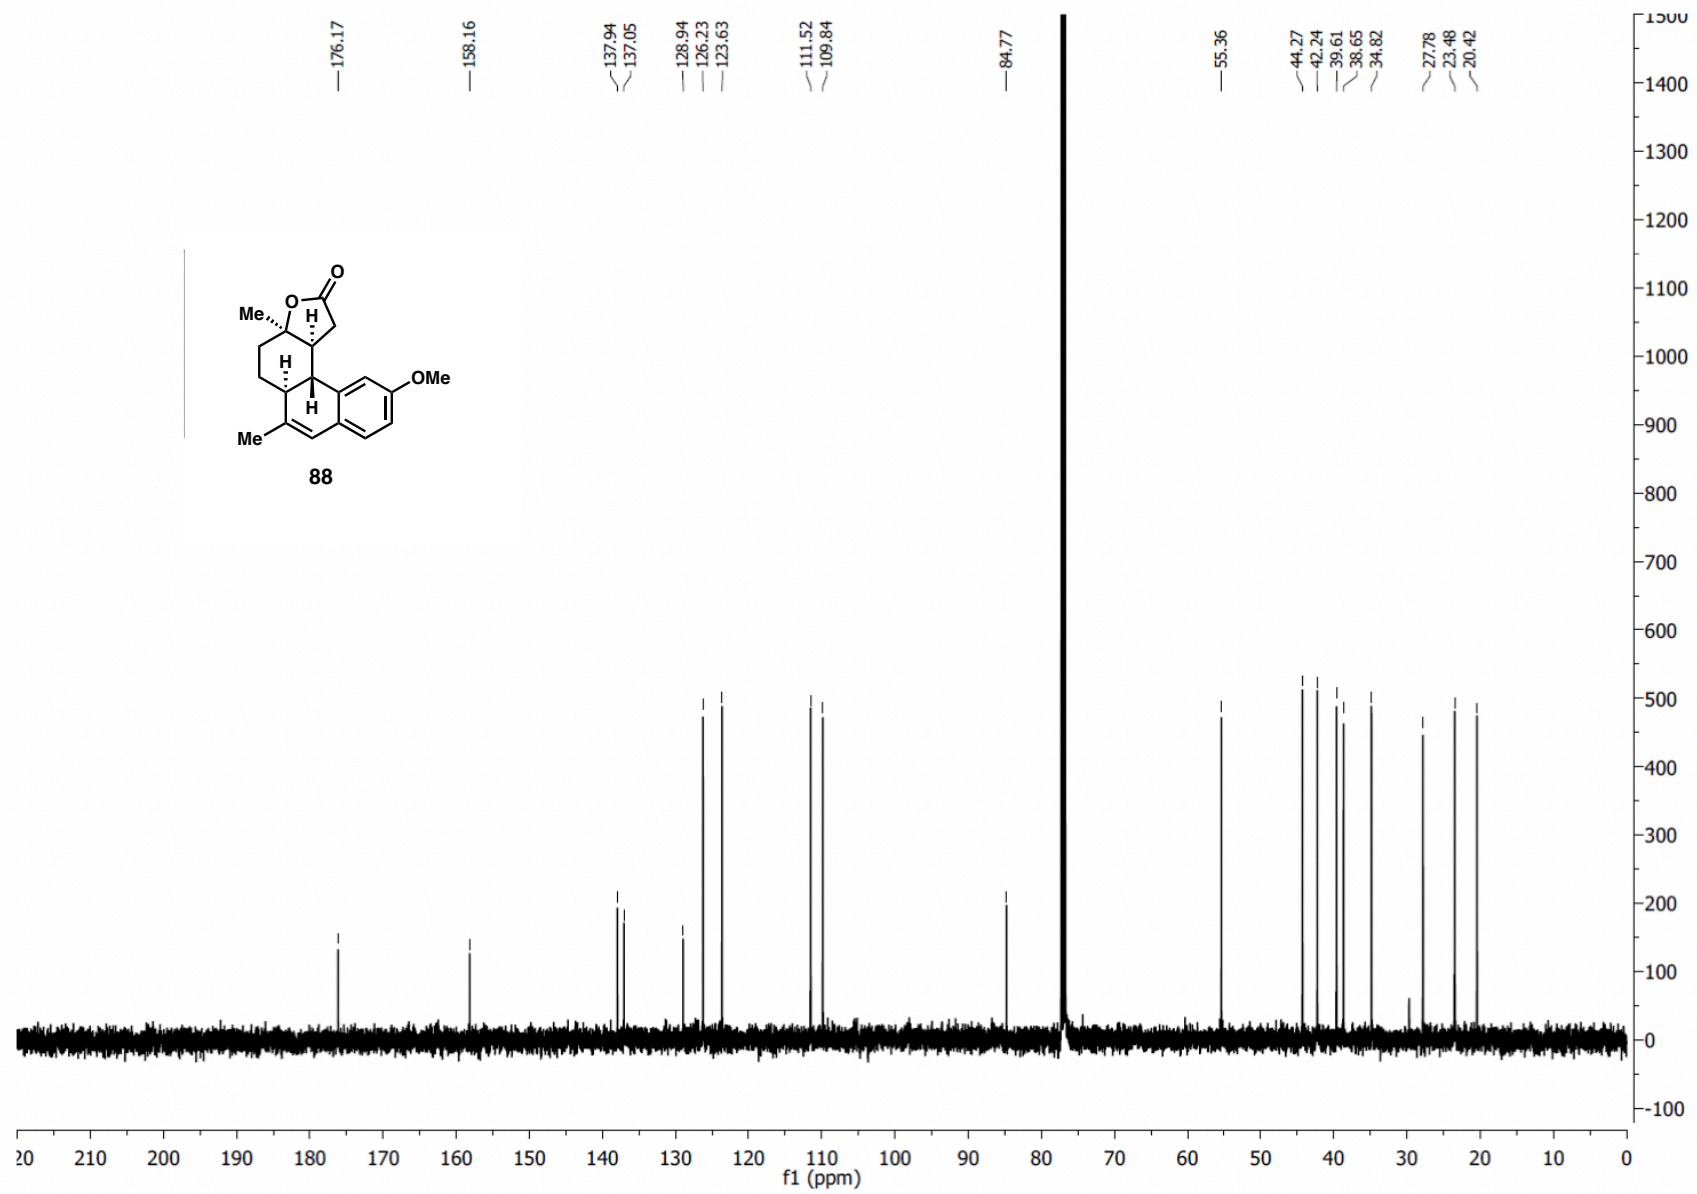

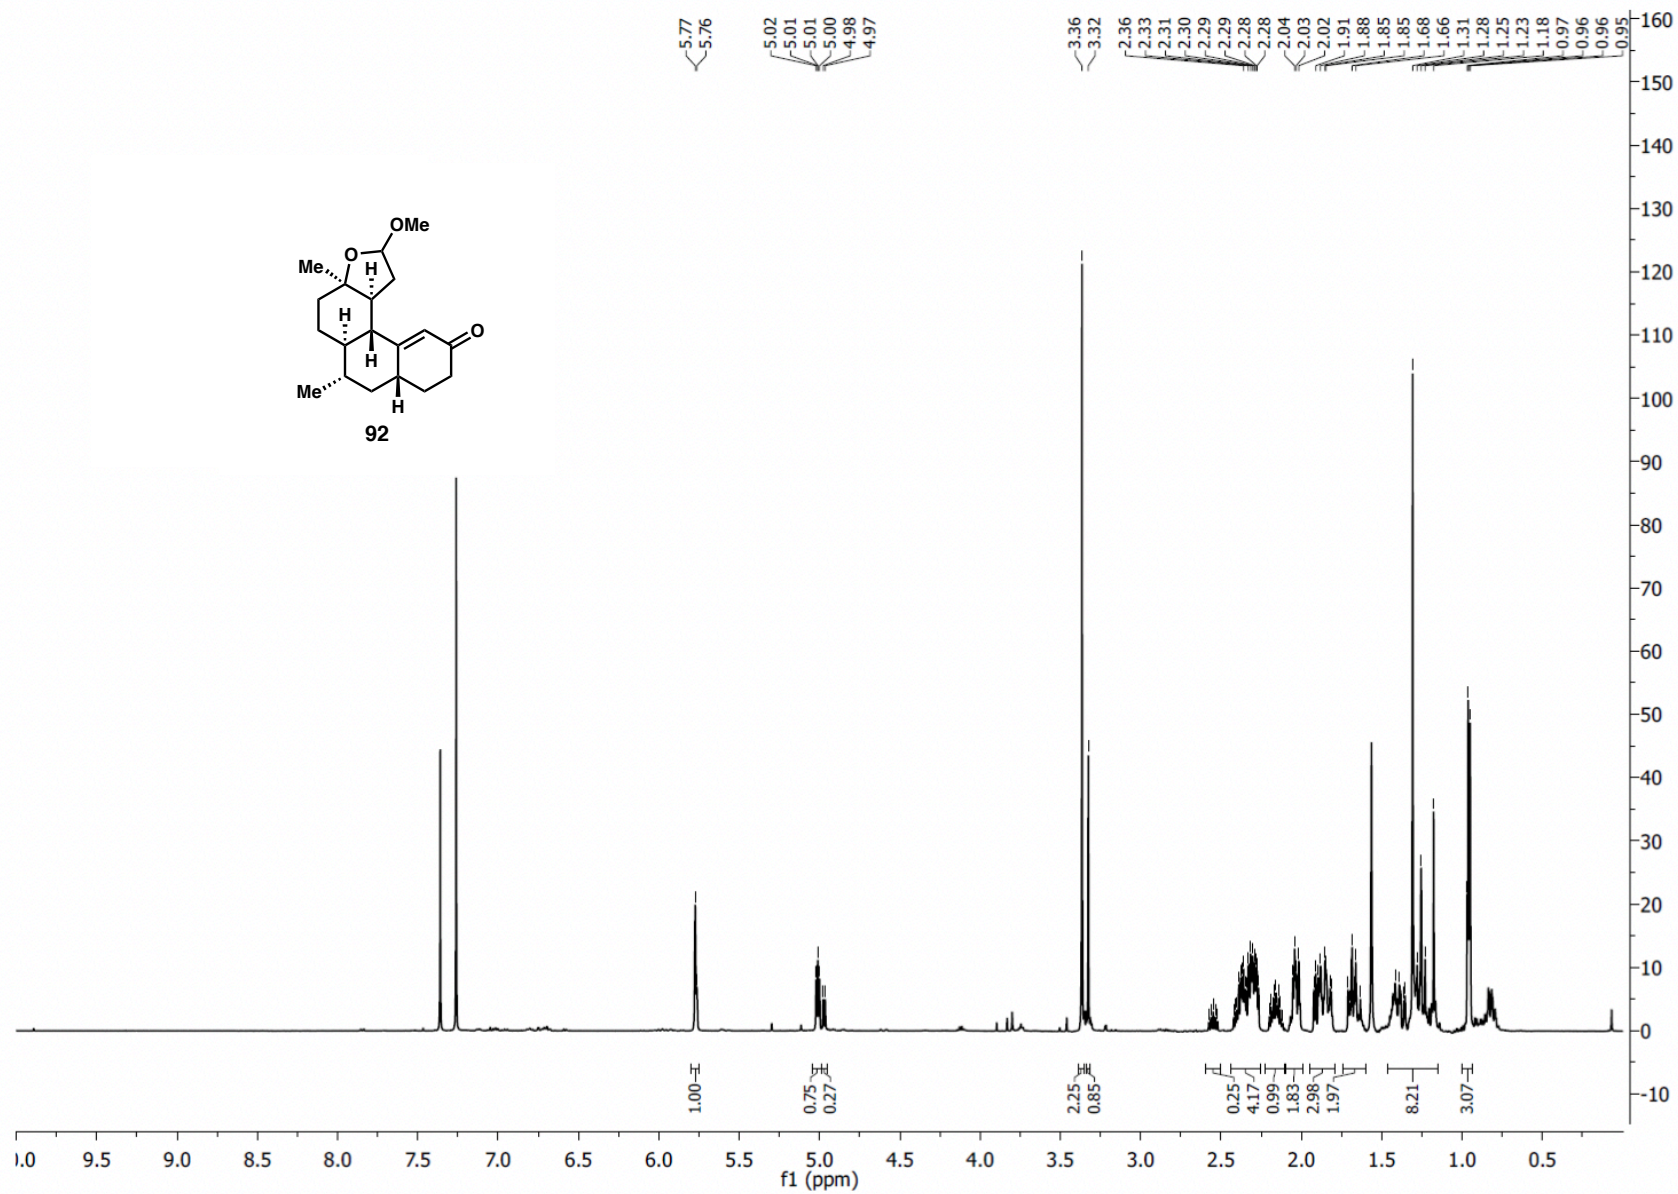



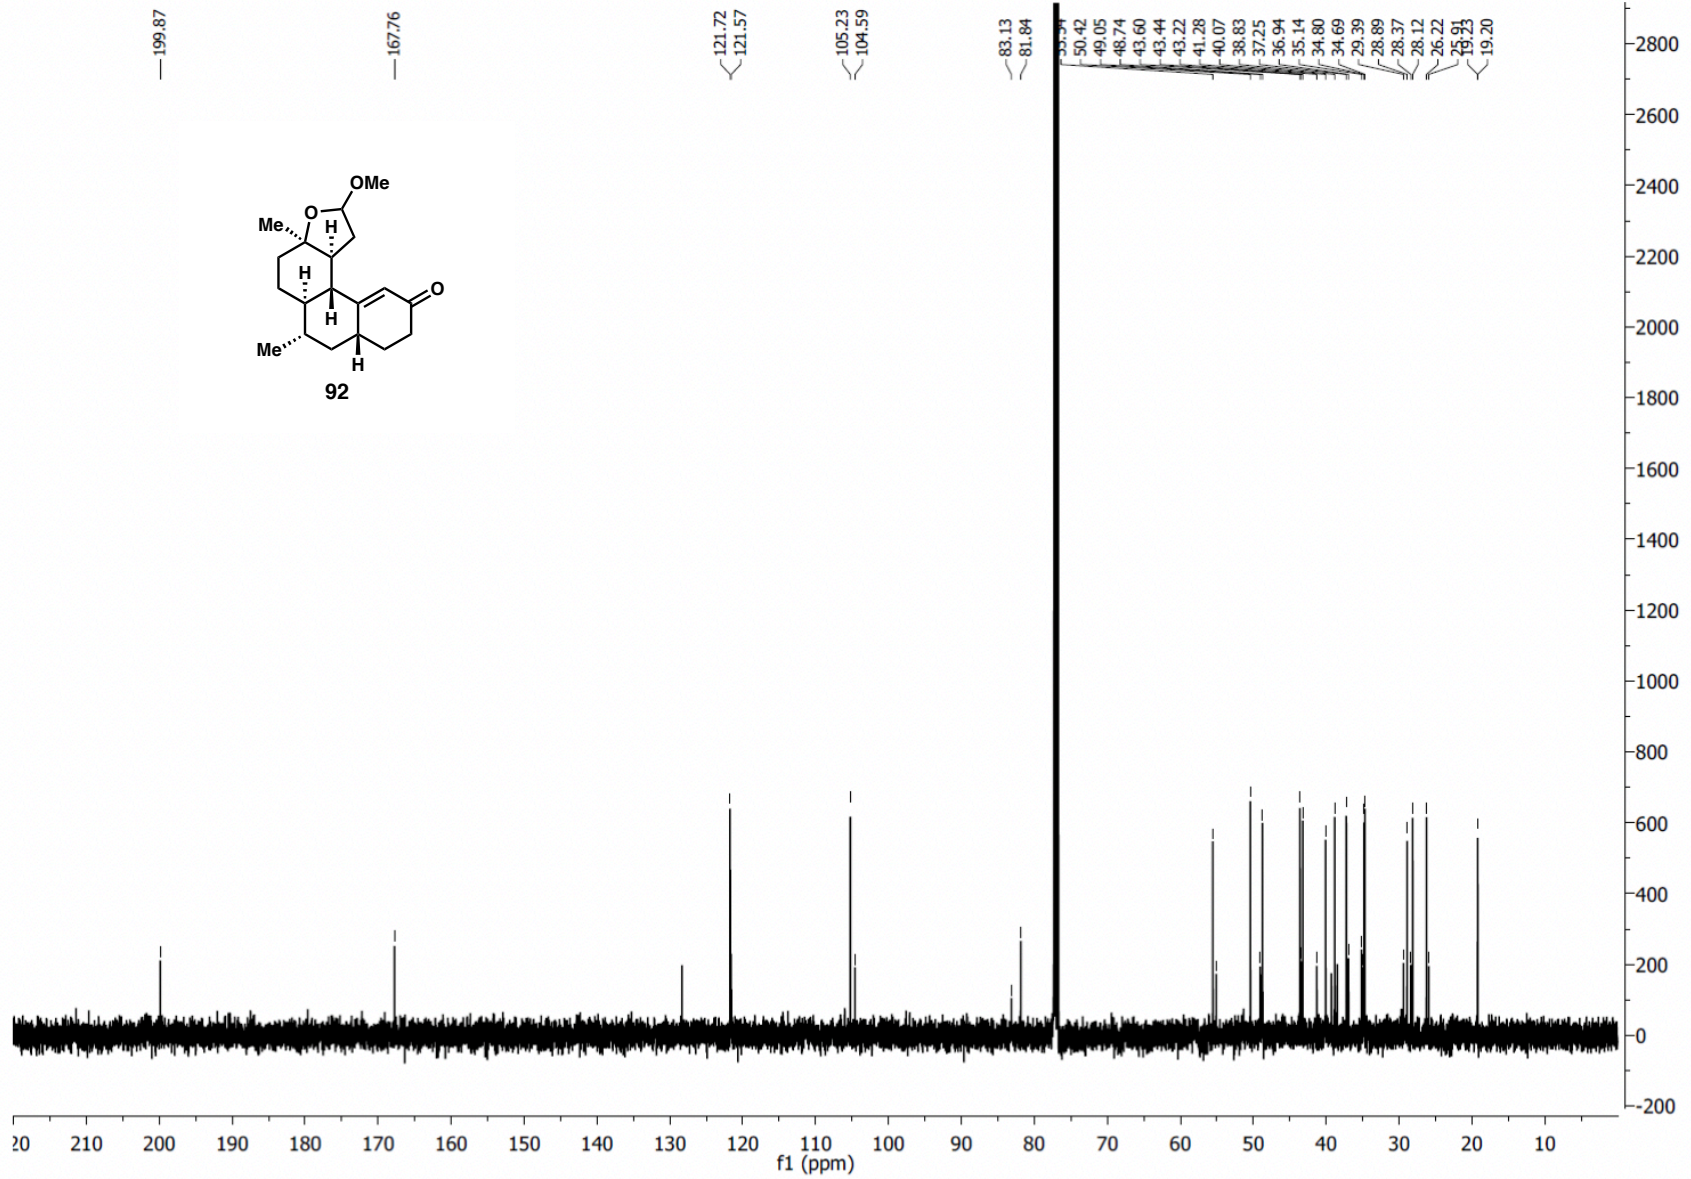



1H spectrum

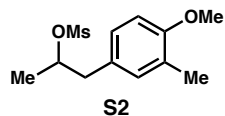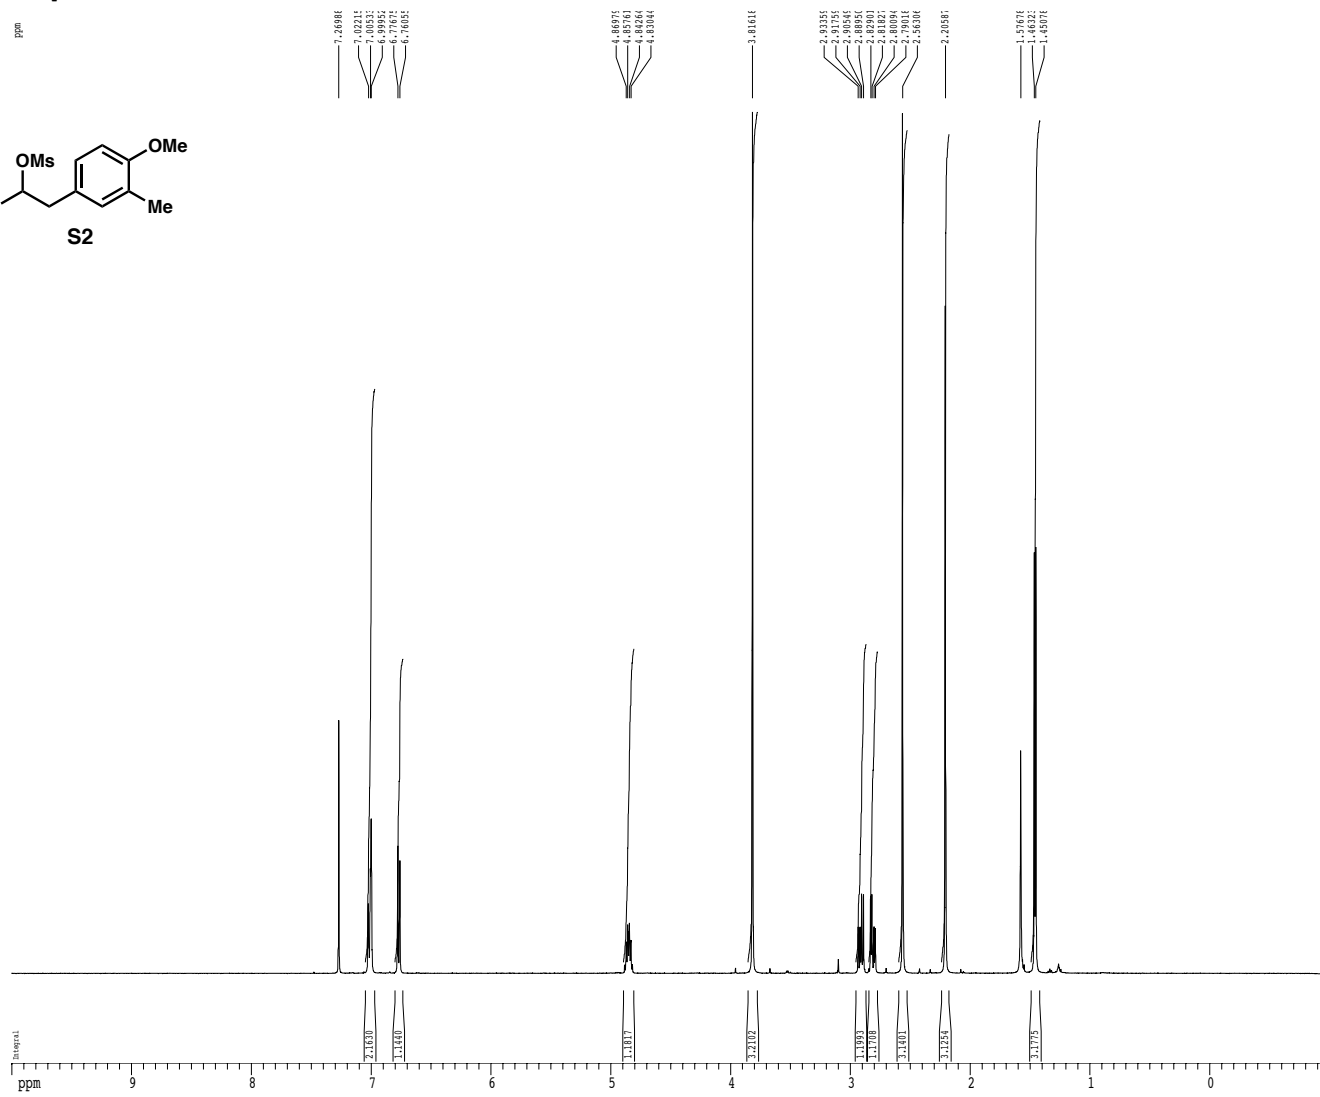

```

Current Data Parameters
USER          roosen
NAME          pc3.140_isolate
EXPNO        1
PROCNO       1

F2 - Acquisition Parameters
Date_        20140707
Time         23.02
INSTRUM      cryo500
PROBHD      5 mm CPYCI 1H-
PULPROG      zg30
TD           32048
SOLVENT      CDCl3
NS           16
DS           2
SWH          8012.820 Hz
FIDRES       0.250026 Hz
AQ           1.9998451 sec
RG           5
DM           62.400 usec
DE           6.00 usec
TE           298.0 K
D1           0.10000000 sec
MCHYST       0.00000000 sec
MCHRX        0.01500000 sec

----- CHANNEL f1 -----
NUC1          1H
P1            7.50 usec
PE1           1.60 dB
SFO1         500.2239015 MHz

F2 - Processing parameters
SI            65536
SF           500.220266 MHz
WDW           EM
SSB           0
LB            0.30 Hz
GB            0
PC            4.00

1D NMR plot parameters
CX            22.80 cm
CT            15.60 cm
FIP           10.000 ppm
FI            5002.20 Hz
FP            -1.000 ppm
FQ            -500.22 Hz
PPHMH         0.48246 ppm/cm
HSCN         241.33423 Hz/cm
    
```

Z-restored spin-echo 13C spectrum with 1H decoupling

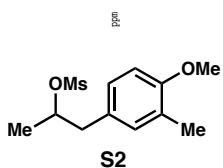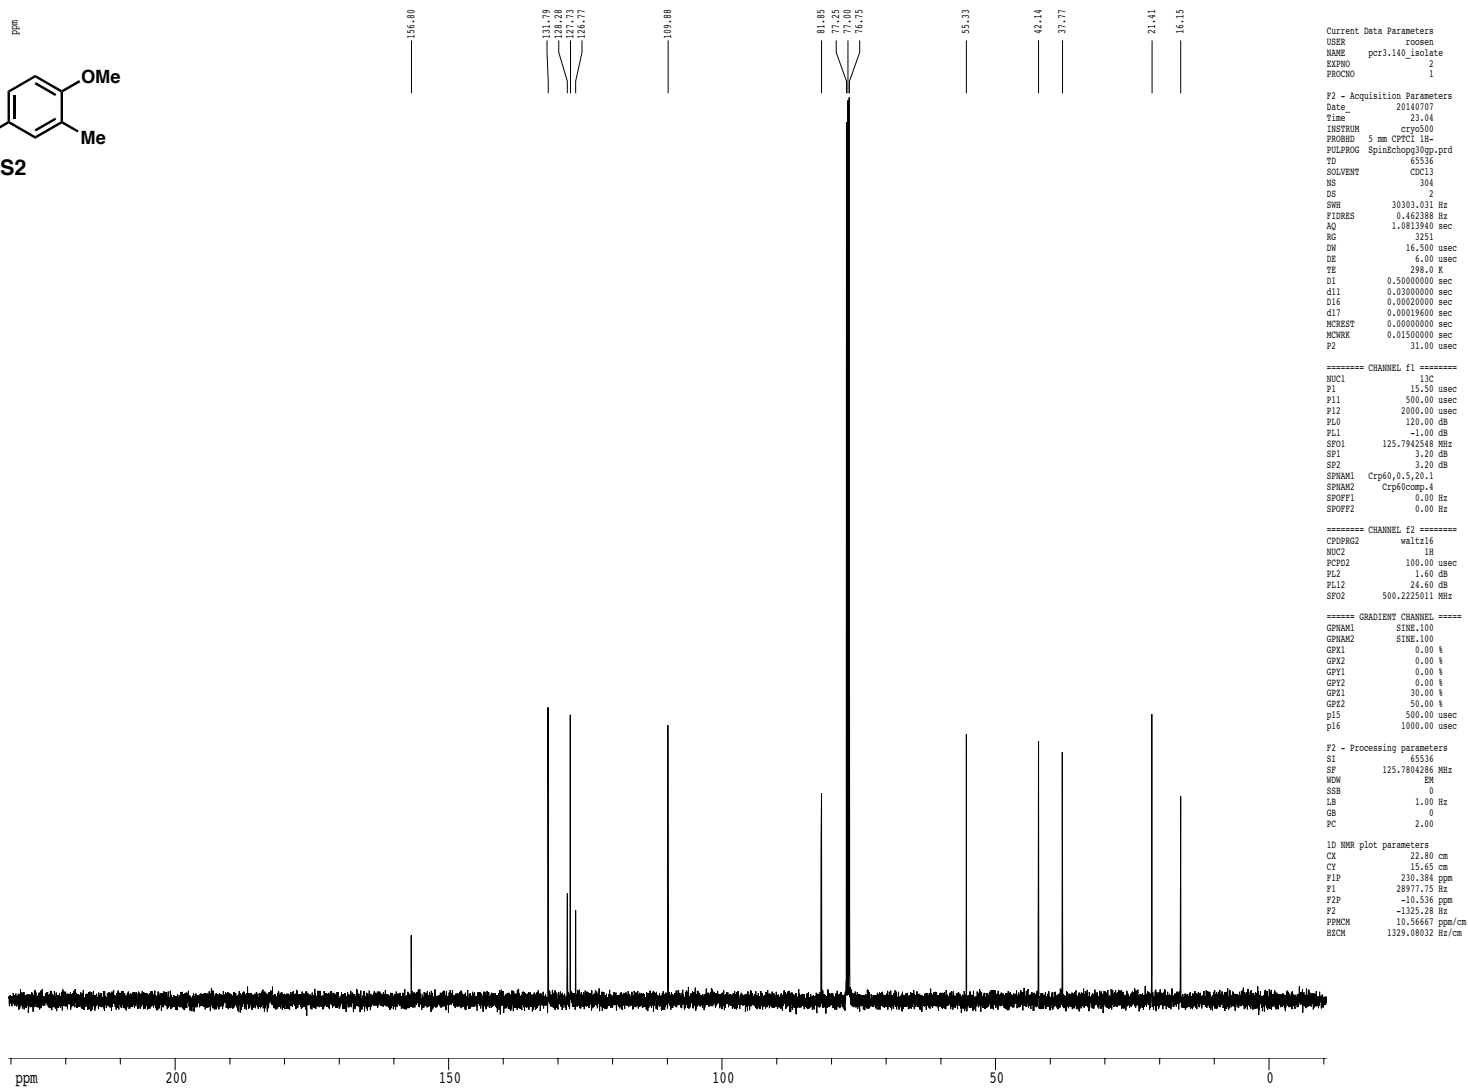

```

Current Data Parameters
USER          roosen
NAME         pcr3.140 isolate
EXPNO        2
PROCNO       1

F2 - Acquisition Parameters
Date_        20140707
Time         23.04
INSTRUM      cryo500
PROBHD       5 mm CPCL 1H-
PULPROG      SpinEcho30pp.prd
TD           65536
SOLVENT      CDCl3
NS           304
DS           2
SWE          30303.031 Hz
FIDRES       0.462388 Hz
AQ           1.0813940 sec
RG           3251
DW           16.500 usec
DE           6.00 usec
TE           298.2 K
D1           0.50000000 sec
d11          0.03000000 sec
D16          0.00000000 sec
d17          0.00019600 sec
MCREST       0.00000000 sec
MCMCR        0.01500000 sec
P2           31.00 usec

===== CHANNEL f1 =====
NUC1         13C
P1           15.50 usec
PL1          500.00 usec
PL2          2000.00 usec
PL0         120.00 dB
PL1         -1.00 dB
SFO1        125.7942549 MHz
SF1          3.20 dB
SF2          3.20 dB
SFO2         Crp60,0.5,20.1
SFO3         Crp60comp.4
SFOFF1       0.00 Hz
SFOFF2       0.00 Hz

===== CHANNEL f2 =====
CPDPRG2      waltz16
NUC2         1H
PCPD2       100.00 usec
PL2         1.60 dB
PL12        24.60 dB
SFO2        500.2225011 MHz

===== GRADIENT CHANNEL =====
GPRAM1       SINE.100
GPRAM2       SINE.100
GEX1         0.00 %
GFX2         0.00 %
GFT1         0.00 %
GFT2         0.00 %
GFT3         0.00 %
GFT4         30.00 %
GFT5         50.00 %
p15          500.00 usec
p16          1000.00 usec

F2 - Processing parameters
SI           65536
SF           125.7804286 MHz
WDW          EM
SSB          0
LB           1.00 Hz
GB           0
PC           2.00

1D NMR plot parameters
CX           22.80 cm
CY           15.68 cm
F1P          230.384 ppm
F1           28977.75 Hz
F2P          -10.536 ppm
F2           -125.2 Hz
FPCMCN       10.56667 ppm/cm
HPCMCN       1329.08032 Hz/cm
    
```

<sup>1</sup>H spectrum

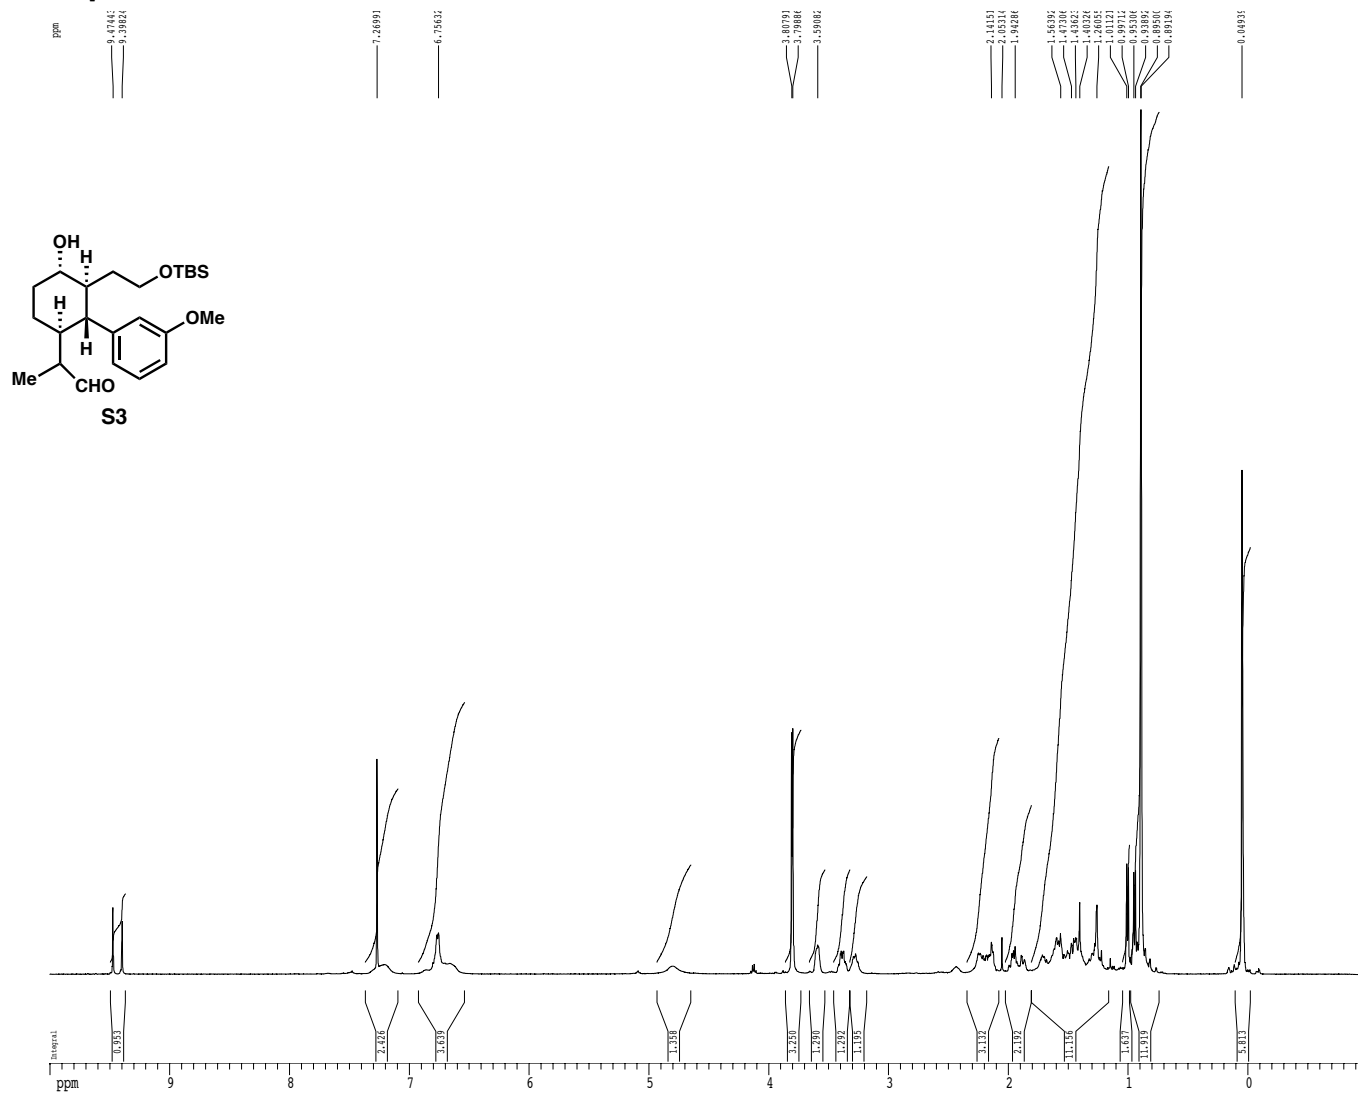

```

Current Data Parameters
USER          roosen
NAME          pcr4.217_isolate
EXPNO         1
PROCNO        1

F2 - Acquisition Parameters
Date_         20150715
Time          14.59
INSTRUM       cryo500
PROBHD        5 mm CPMCI 1H-
PULPROG       zg30
TD            32048
SOLVENT       CDCl3
NS            8
DS            2
SWH           8012.820 Hz
FIDRES        0.250026 Hz
AQ            1.9998451 sec
RG            8
EW           62.400 usec
DE            6.00 usec
TE            298.0 K
DQ            0.10000000 sec
MCHYST        0.00000000 sec
MCHXK         0.01500000 sec

----- CHANNEL f1 -----
NUC1          1H
P1            7.50 usec
PL1           1.60 dB
SFO1         500.2239015 MHz

F2 - Processing parameters
SI            65536
SF           500.220269 MHz
WDW           EM
SSB           0
LB            0.30 Hz
GB            0
PC            4.00

1D NMR plot parameters
CX            22.80 cm
CT            15.00 cm
FIP           10.000 ppm
F1            5002.20 Hz
F2            -1.000 ppm
F0            +500.22 Hz
PPHM         0.48246 ppm/cm
HSCM         241.33423 Hz/cm
    
```

Z-restored spin-echo 13C spectrum with 1H decoupling

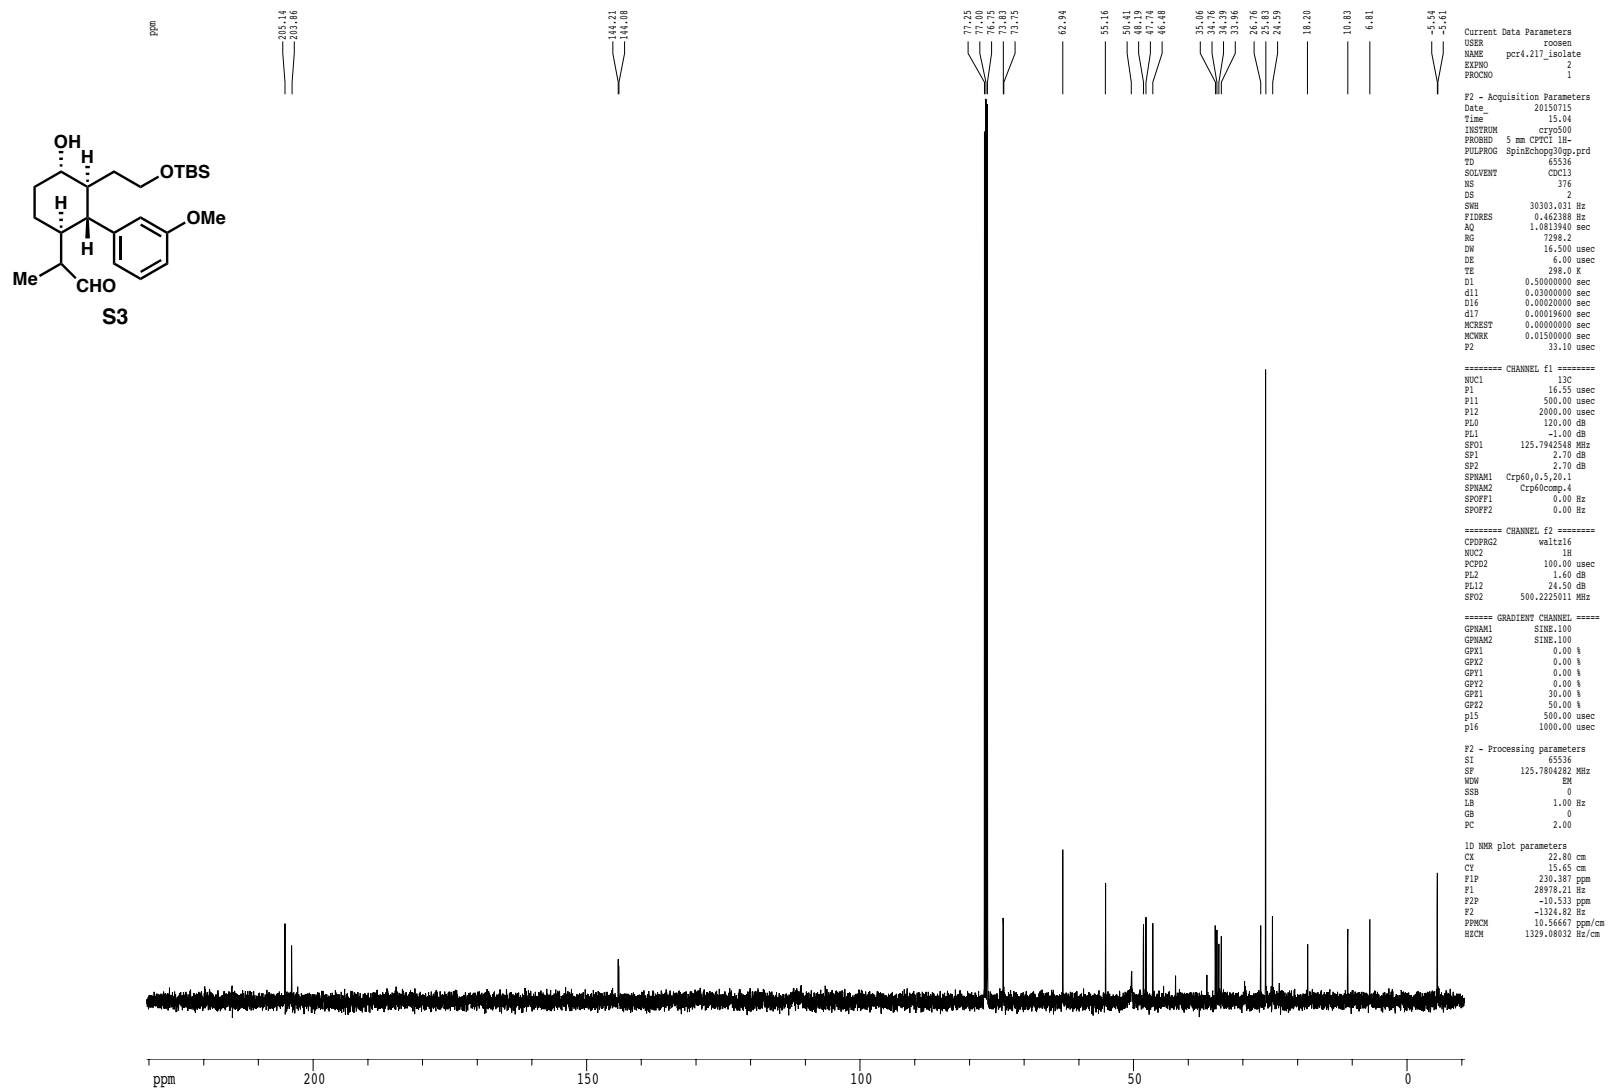

<sup>1</sup>H spectrum

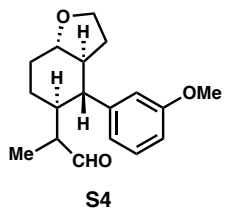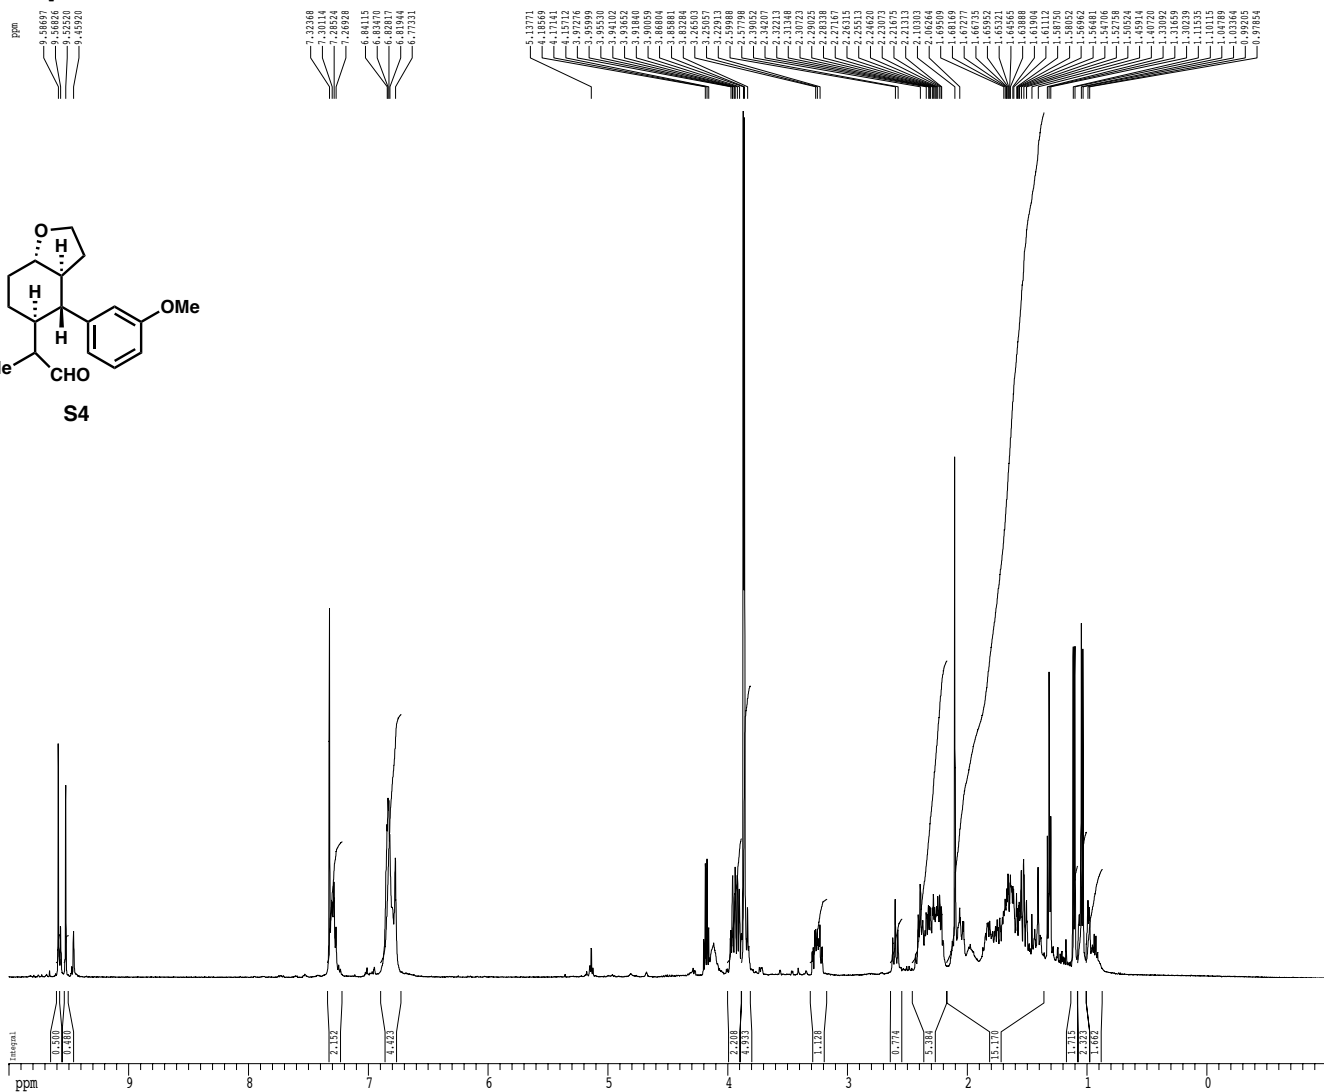

```

Current Data Parameters
USER      roosen
NAME      pcr4.224_isolate
EXPNO    1
PROCNO   1

F2 - Acquisition Parameters
Date_    20150722
Time     9.41
INSTRUM  cryo500
PROBHD   5 mm CPTCI 1H-
PULPROG  zg30
TD       32048
SOLVENT  CDCl3
NS       8
DS       2
SWH      8012.820 Hz
FIDRES   0.250026 Hz
AQ       1.9998451 sec
RG       6.3
DW       62.400 usec
DE       6.00 usec
TE       298.0 K
D1       0.10000000 sec
MCKEYST  0.00000000 sec
MCKWRK   0.01500000 sec

===== CHANNEL f1 =====
NUC1      1H
P1       7.50 usec
PL1      1.60 dB
SFO1     500.2235015 MHz

F2 - Processing parameters
SI        65536
SF       500.2230000 MHz
WDW      EM
SSB      0
LB       0.30 Hz
GB       0
PC       4.00

1D NMR plot parameters
CX       22.80 cm
CY       15.00 cm
FLP      10.000 ppm
F1       5002.20 Hz
F2P      -1.000 ppm
F2       -500.22 Hz
FPCMN    0.68246 ppm/cm
H1CHM    241.33421 Hz/cm
    
```

Z-restored spin-echo 13C spectrum with 1H decoupling

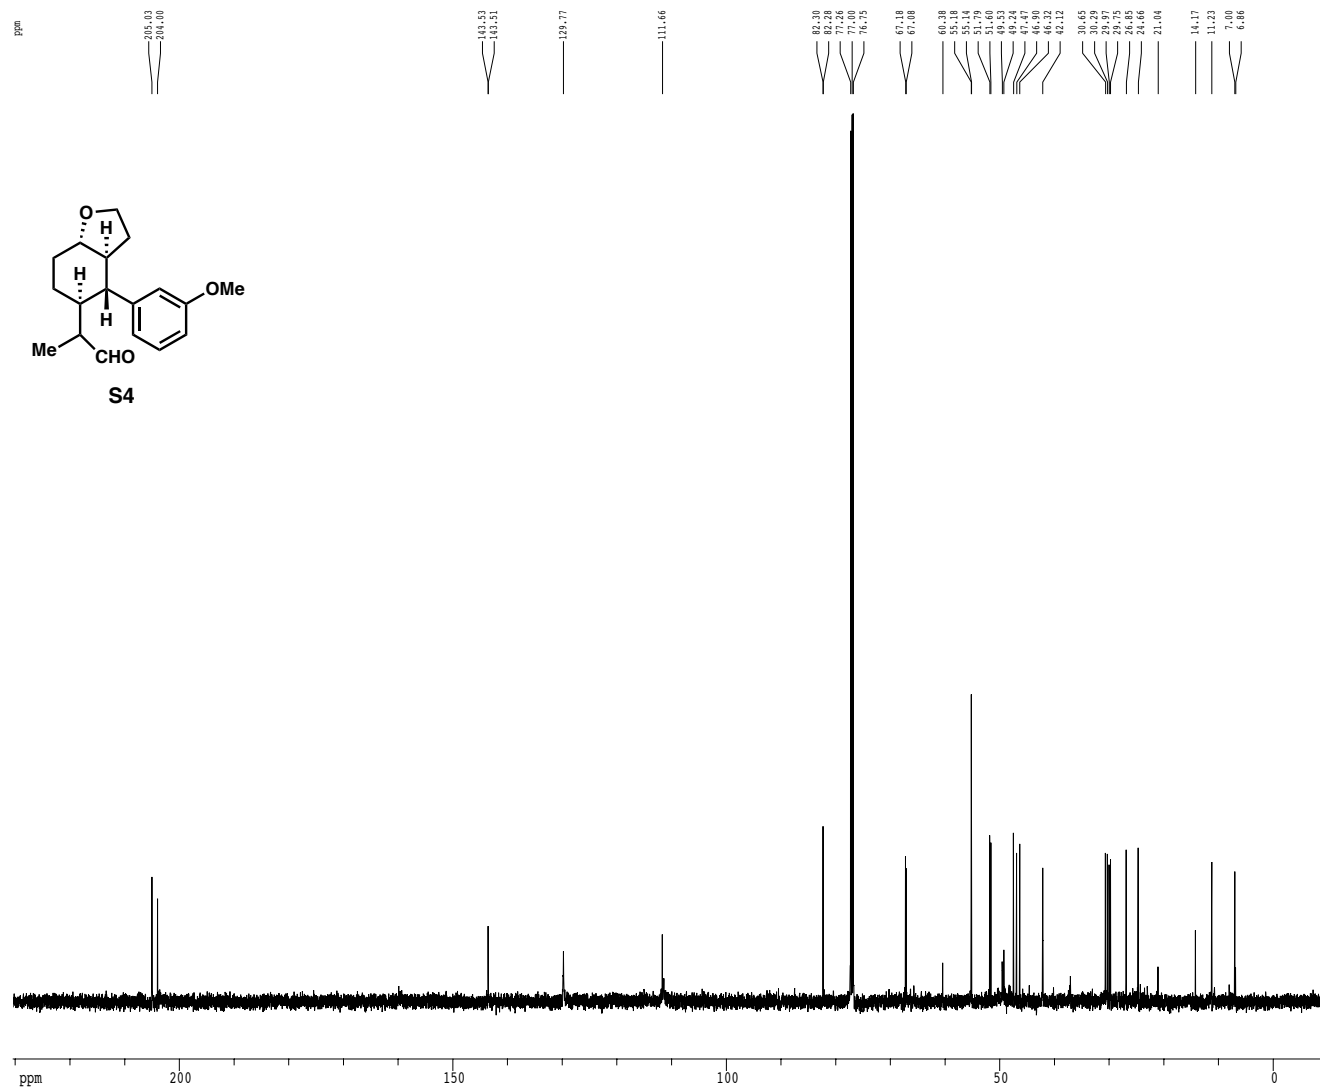

```

Current Data Parameters
USER          roosen
NAME         pcr4.224_isolate
EXPNO        2
PROCNO       1

F2 - Acquisition Parameters
Date_         20150722
Time          9.43
INSTRUM      cryo500
PROBHD       5 mm CPYC1 1H-
PULPROG      Spinschops30pp.prd
TD           65536
SOLVENT      CDCl3
NS           304
DS           2
SWH          30303.031 Hz
FIDRES      0.462388 Hz
AQ          1.0813940 sec
RG          3446.1
DW          16.500 usec
DE          6.00 usec
TE          298.0 K
D1          0.50000000 sec
d11         0.03000000 sec
D16         0.00020000 sec
d17         0.00019600 sec
MCREST      0.00000000 sec
MCRMK       0.01000000 sec
P2          33.10 usec

===== CHANNEL f1 =====
NUC1         13C
P1           16.55 usec
PL1          500.00 usec
PL2          2000.00 usec
PL0          120.00 dB
PL1         -1.00 dB
SFO1        125.7842548 MHz
SP1          2.70 dB
SP2          2.70 dB
SFOAM1       Crp60,0.5,20.1
SFOAM2       Crp60comp,4
SFOFF1       0.00 Hz
SFOFF2       0.00 Hz

===== CHANNEL f2 =====
CPDPRG2     waltz16
NUC2         1H
PCPD2       100.00 usec
PL2         1.60 dB
PL12        24.50 dB
SFO2        500.2225011 MHz

===== GRADIENT CHANNEL =====
GPRAM1      SINE.100
GPRAM2      SINE.100
GPX1        0.00 %
GPX2        0.00 %
GPF1        0.00 %
GPF2        0.00 %
GPI1        30.00 %
GPI2        50.00 %
p15         500.00 usec
p16         1000.00 usec

F2 - Processing parameters
SI          65536
SF          125.7804295 MHz
WDW         EM
SSB         0
LB          1.00 Hz
GB          0
PC          2.00

1D NMR plot parameters
CX          22.80 cm
CY          15.65 cm
F1P         230.637 ppm
F1          29009.68 Hz
F2P         -10.287 ppm
F2          -1293.96 Hz
FPGMC       10.56688 ppm/cm
HECM       1329.10718 Hz/cm
    
```
